# Supplementary material for: Data assimilation with an improved particle filter and its application in the TRIGRS landslide model
Source: Copernicus journal article supplement (doi:10.5194/nhess-18-2801-2018), 2018-10-26
Supplement: Supplementary file 1 [file Data set of Fig.1 annd Fig.2.xlsx]

## Sheet: Sheet1
Step	Lorenz-63 model	Observations	Assimilated results	95% Confidence interval of X
				upper	lower
0	1.50887	1.50887	1.50887	7.05259	-4.03485
1	1.20486		1.20486	6.7892	-4.29824
2	0.936606		0.936606	6.41744	-4.66999
3	0.700563		0.700563	6.08934	-4.99809
4	0.49322		0.49322	5.79985	-5.28758
5	0.311188		0.311188	5.54417	-5.54326
6	0.151256		0.151256	5.31779	-5.76965
7	0.0104171		0.0104171	5.11653	-5.9709
8	-0.11411		-0.11411	4.93661	-6.15083
9	-0.224876		-0.224876	4.77458	-6.31286
10	-0.324206		-0.324206	4.62736	-6.46007
11	-0.414207		-0.414207	4.49221	-6.59522
12	-0.49678		-0.49678	4.3667	-6.72073
13	-0.573643		-0.573643	4.24868	-6.83876
14	-0.646342		-0.646342	4.13625	-6.95118
15	-0.716276		-0.716276	4.02778	-7.05965
16	-0.784717		-0.784717	3.92182	-7.16562
17	-0.852826		-0.852826	3.81711	-7.27033
18	-0.921673		-0.921673	3.71256	-7.37487
19	-0.992258		-0.992258	3.60725	-7.48018
20	-1.06552		-1.06552	3.50037	-7.58706
21	-1.14238		-1.14238	3.39125	-7.69619
22	-1.22369		-1.22369	3.27932	-7.80811
23	-1.31035		-1.31035	3.16416	-7.92327
24	-1.40322		-1.40322	3.04545	-8.04199
25	-1.5032		-1.5032	2.92299	-8.16444
26	-1.6112		-1.6112	2.79674	-8.29069
27	-1.72818		-1.72818	2.66678	-8.42065
28	-1.85517		-1.85517	2.53338	-8.55405
29	-1.99323		-1.99323	2.39697	-8.69046
30	-2.1435		-2.1435	2.2582	-8.82923
31	-2.30721		-2.30721	2.11794	-8.96949
32	-2.48569		-2.48569	1.9773	-9.11013
33	-2.68033		-2.68033	1.83763	-9.24981
34	-2.89266		-2.89266	1.70055	-9.38688
35	-3.12431		-3.12431	1.56797	-9.51947
36	-3.37701		-3.37701	1.44201	-9.64542
37	-3.65261		-3.65261	1.32509	-9.76235
38	-3.95306		-3.95306	1.21979	-9.86765
39	-4.28043		-4.28043	1.1289	-9.95854
40	-4.63682	-6.92288	-4.63682	-1.77604	-12.8635
41	-5.02443		-5.02443	-2.45082	-13.5383
42	-5.44541		-5.44541	-3.11627	-14.2037
43	-5.90191		-5.90191	-3.7745	-14.8619
44	-6.39589		-6.39589	-4.42545	-15.5129
45	-6.92907		-6.92907	-5.06684	-16.1543
46	-7.5028		-7.5028	-5.69406	-16.7815
47	-8.11779		-8.11779	-6.30017	-17.3876
48	-8.77396		-8.77396	-6.87601	-17.9634
49	-9.4701		-9.4701	-7.41031	-18.4977
50	-10.2035		-10.2035	-7.89009	-18.9775
51	-10.9695		-10.9695	-8.30112	-19.3886
52	-11.7613		-11.7613	-8.62871	-19.7161
53	-12.5689		-12.5689	-8.85859	-19.946
54	-13.3792		-13.3792	-8.97799	-20.0654
55	-14.1754		-14.1754	-8.97675	-20.0642
56	-14.9365		-14.9365	-8.84838	-19.9358
57	-15.6378		-15.6378	-8.59081	-19.6782
58	-16.2511		-16.2511	-8.20684	-19.2943
59	-16.7458		-16.7458	-7.7041	-18.7915
60	-17.0909		-17.0909	-7.09455	-18.182
61	-17.2568		-17.2568	-6.39364	-17.4811
62	-17.2187		-17.2187	-5.61917	-16.7066
63	-16.9593		-16.9593	-4.79016	-15.8776
64	-16.4718		-16.4718	-3.92571	-15.0131
65	-15.7613		-15.7613	-3.04408	-14.1315
66	-14.8456		-14.8456	-2.162	-13.2494
67	-13.7538		-13.7538	-1.29414	-12.3816
68	-12.5235		-12.5235	-0.452843	-11.5403
69	-11.1972		-11.1972	0.351988	-10.7354
70	-9.81827		-9.81827	1.1129	-9.97453
71	-8.42741		-8.42741	1.82476	-9.26268
72	-7.05982		-7.05982	2.4845	-8.60293
73	-5.74372		-5.74372	3.09092	-7.99652
74	-4.49993		-4.49993	3.6443	-7.44314
75	-3.34218		-3.34218	4.14617	-6.94126
76	-2.27803		-2.27803	4.59899	-6.48845
77	-1.31002		-1.31002	5.00587	-6.08157
78	-0.436793		-0.436793	5.37036	-5.71707
79	0.345752		0.345752	5.69628	-5.39115
80	1.04361	2.02218	1.04361	11.5017	0.414291
81	1.66389		1.66389	12.1	1.01258
82	2.21428		2.21428	12.6273	1.53982
83	2.70264		2.70264	13.0891	2.00164
84	3.13668		3.13668	13.4904	2.40293
85	3.52377		3.52377	13.8353	2.7479
86	3.87086		3.87086	14.1275	3.04011
87	4.18433		4.18433	14.37	3.28261
88	4.47004		4.47004	14.5655	3.47803
89	4.73328		4.73328	14.7162	3.62875
90	4.97877		4.97877	14.8244	3.73697
91	5.2107		5.2107	14.8923	3.80486
92	5.4328		5.4328	14.922	3.83459
93	5.64828		5.64828	14.9159	3.82847
94	5.85994		5.85994	14.8764	3.78893
95	6.07019		6.07019	14.806	3.7186
96	6.28104		6.28104	14.7078	3.62033
97	6.49416		6.49416	14.5846	3.49716
98	6.71089		6.71089	14.4397	3.35229
99	6.93224		6.93224	14.2765	3.18909
100	7.15893		7.15893	14.0984	3.01102
101	7.39137		7.39137	13.909	2.82152
102	7.62969		7.62969	13.7115	2.62402
103	7.87368		7.87368	13.5093	2.42182
104	8.12286		8.12286	13.3054	2.21801
105	8.37642		8.37642	13.1029	2.01547
106	8.63323		8.63323	12.9042	1.8168
107	8.89183		8.89183	12.7117	1.62427
108	9.15041		9.15041	12.5273	1.43986
109	9.40684		9.40684	12.3527	1.26522
110	9.65865		9.65865	12.1891	1.1017
111	9.90304		9.90304	12.0378	0.950351
112	10.137		10.137	11.8994	0.811961
113	10.357		10.357	11.7745	0.687071
114	10.5598		10.5598	11.6634	0.576002
115	10.7416		10.7416	11.5663	0.478882
116	10.8988		10.8988	11.4831	0.395666
117	11.0279		11.0279	11.4136	0.326164
118	11.1254		11.1254	11.3575	0.270061
119	11.1885		11.1885	11.3144	0.22694
120	11.2146	10.0279	11.2146	18.0585	6.97103
121	11.2019		11.2019	18.6282	7.54078
122	11.1491		11.1491	19.0496	7.96213
123	11.0561		11.0561	19.3145	8.22709
124	10.9233		10.9233	19.4169	8.32947
125	10.7523		10.7523	19.3538	8.26636
126	10.5453		10.5453	19.1268	8.0394
127	10.3056		10.3056	18.7431	7.65567
128	10.0371		10.0371	18.2153	7.12787
129	9.74406		9.74406	17.5614	6.47394
130	9.43146		9.43146	16.8034	5.71601
131	9.10434		9.10434	15.9663	4.87883
132	8.76783		8.76783	15.0755	3.98809
133	8.42698		8.42698	14.1562	3.06873
134	8.08658		8.08658	13.231	2.14358
135	7.75109		7.75109	12.3198	1.23237
136	7.42451		7.42451	11.4386	0.351162
137	7.11034		7.11034	10.5997	-0.487748
138	6.81159		6.81159	9.81175	-1.27569
139	6.53071		6.53071	9.08022	-2.00722
140	6.26965		6.26965	8.40779	-2.67965
141	6.02991		6.02991	7.79491	-3.29252
142	5.81252		5.81252	7.24033	-3.84711
143	5.61816		5.61816	6.7415	-4.34594
144	5.4472		5.4472	6.295	-4.79244
145	5.2997		5.2997	5.89684	-5.1906
146	5.17557		5.17557	5.54271	-5.54472
147	5.07452		5.07452	5.22818	-5.85925
148	4.99615		4.99615	4.94885	-6.13858
149	4.94		4.94	4.70044	-6.38699
150	4.90558		4.90558	4.47888	-6.60856
151	4.89237		4.89237	4.28033	-6.8071
152	4.89986		4.89986	4.10125	-6.98619
153	4.92761		4.92761	3.93835	-7.14908
154	4.97518		4.97518	3.78865	-7.29878
155	5.04221		5.04221	3.64944	-7.43799
156	5.12839		5.12839	3.51826	-7.56917
157	5.23346		5.23346	3.3929	-7.69454
158	5.35724		5.35724	3.27137	-7.81606
159	5.49956		5.49956	3.15189	-7.93554
160	5.66032	6.14983	5.66032	6.74087	-4.34657
161	5.83942		5.83942	7.50238	-3.58505
162	6.03677		6.03677	8.19021	-2.89722
163	6.25227		6.25227	8.81779	-2.26964
164	6.48575		6.48575	9.39707	-1.69036
165	6.73698		6.73698	9.93844	-1.14899
166	7.00563		7.00563	10.4508	-0.636666
167	7.29118		7.29118	10.9414	-0.145985
168	7.59295		7.59295	11.4165	0.329069
169	7.90997		7.90997	11.8806	0.793201
170	8.241		8.241	12.3373	1.24987
171	8.5844		8.5844	12.7888	1.70132
172	8.93812		8.93812	13.2361	2.14866
173	9.29962		9.29962	13.6793	2.59186
174	9.66579		9.66579	14.1172	3.0298
175	10.033		10.033	14.5478	3.46033
176	10.3968		10.3968	14.9677	3.88031
177	10.7524		10.7524	15.3732	4.28575
178	11.094		11.094	15.7594	4.67194
179	11.4157		11.4157	16.1211	5.03363
180	11.7106		11.7106	16.4527	5.36531
181	11.9719		11.9719	16.7489	5.66145
182	12.1925		12.1925	17.0042	5.91679
183	12.3655		12.3655	17.2141	6.12666
184	12.4844		12.4844	17.3746	6.28716
185	12.5435		12.5435	17.4828	6.39537
186	12.5383		12.5383	17.5368	6.4494
187	12.4656		12.4656	17.5359	6.44848
188	12.3242		12.3242	17.4802	6.3928
189	12.1145		12.1145	17.3709	6.28345
190	11.8391		11.8391	17.2097	6.12224
191	11.5026		11.5026	16.999	5.91153
192	11.1112		11.1112	16.7415	5.65406
193	10.6728		10.6728	16.4403	5.35284
194	10.1961		10.1961	16.0984	5.011
195	9.69066		9.69066	15.7193	4.63184
196	9.16635		9.16635	15.3062	4.21877
197	8.63266		8.63266	14.8629	3.77545
198	8.09861		8.09861	14.3933	3.30584
199	7.57233		7.57233	13.9018	2.81432
200	7.06094	3.99251	7.06094	8.44484	-2.6426
201	6.57038		6.57038	8.66341	-2.42402
202	6.10539		6.10539	8.84806	-2.23938
203	5.66957		5.66957	9.00384	-2.08359
204	5.26544		5.26544	9.1356	-1.95183
205	4.89455		4.89455	9.24782	-1.83961
206	4.55762		4.55762	9.3446	-1.74283
207	4.25471		4.25471	9.42962	-1.65781
208	3.98528		3.98528	9.50616	-1.58127
209	3.74841		3.74841	9.5771	-1.51033
210	3.54287		3.54287	9.64498	-1.44246
211	3.36721		3.36721	9.71198	-1.37546
212	3.21991		3.21991	9.78	-1.30743
213	3.09936		3.09936	9.85069	-1.23675
214	3.00402		3.00402	9.92543	-1.16201
215	2.93238		2.93238	10.0054	-1.08202
216	2.88305		2.88305	10.0917	-0.995761
217	2.85478		2.85478	10.1851	-0.90238
218	2.84643		2.84643	10.2863	-0.801152
219	2.85705		2.85705	10.396	-0.691477
220	2.88585		2.88585	10.5146	-0.572862
221	2.9322		2.9322	10.6425	-0.444911
222	2.99563		2.99563	10.7801	-0.307319
223	3.07585		3.07585	10.9276	-0.159869
224	3.17273		3.17273	11.085	-0.00242953
225	3.28627		3.28627	11.2525	0.165042
226	3.41665		3.41665	11.4299	0.342493
227	3.56417		3.56417	11.6172	0.52977
228	3.72927		3.72927	11.814	0.726604
229	3.9125		3.9125	12.02	0.9326
230	4.11452		4.11452	12.2347	1.14722
231	4.33611		4.33611	12.4572	1.36977
232	4.5781		4.5781	12.6868	1.59936
233	4.84139		4.84139	12.9224	1.83493
234	5.12692		5.12692	13.1626	2.0752
235	5.43563		5.43563	13.4061	2.31866
236	5.76843		5.76843	13.651	2.56358
237	6.12615		6.12615	13.8954	2.80801
238	6.50948		6.50948	14.1372	3.04981
239	6.9189		6.9189	14.374	3.28662
240	7.35459	5.54304	7.35459	13.1008	2.01333
241	7.81633		7.81633	13.5681	2.48068
242	8.30338		8.30338	14.0907	3.00328
243	8.81431		8.81431	14.6632	3.57573
244	9.34688		9.34688	15.2797	4.19224
245	9.89783		9.89783	15.9336	4.84615
246	10.4627		10.4627	16.6168	5.52935
247	11.0356		11.0356	17.3193	6.2319
248	11.6091		11.6091	18.029	6.94158
249	12.1741		12.1741	18.731	7.64361
250	12.7197		12.7197	19.408	8.32052
251	13.2334		13.2334	20.0398	8.95233
252	13.7009		13.7009	20.6044	9.51693
253	14.1069		14.1069	21.0784	9.99092
254	14.4355		14.4355	21.4382	10.3508
255	14.671		14.671	21.6618	10.5743
256	14.7989		14.7989	21.73	10.6426
257	14.8068		14.8068	21.6287	10.5413
258	14.6859		14.6859	21.3499	10.2625
259	14.4318		14.4318	20.893	9.8056
260	14.0451		14.0451	20.2651	9.17772
261	13.5322		13.5322	19.4806	8.39321
262	12.9045		12.9045	18.5601	7.47271
263	12.1781		12.1781	17.5289	6.44146
264	11.3725		11.3725	16.4149	5.32745
265	10.5093		10.5093	15.247	4.15959
266	9.6106		9.6106	14.0534	2.96593
267	8.69772		8.69772	12.8597	1.7723
268	7.79002		7.79002	11.6887	0.601248
269	6.90416		6.90416	10.5589	-0.52856
270	6.05358		6.05358	9.48479	-1.60265
271	5.2485		5.2485	8.4768	-2.61063
272	4.49598		4.49598	7.54151	-3.54593
273	3.80028		3.80028	6.68218	-4.40525
274	3.16323		3.16323	5.89938	-5.18806
275	2.58471		2.58471	5.19147	-5.89596
276	2.06305		2.06305	4.55524	-6.53219
277	1.59547		1.59547	3.98631	-7.10112
278	1.17838		1.17838	3.4796	-7.60784
279	0.807696		0.807696	3.02958	-8.05785
280	0.479058	1.94843	0.479058	2.87248	-8.21495
281	0.188026		0.188026	2.8737	-8.21373
282	-0.0697986		-0.0697986	2.87437	-8.21307
283	-0.298668		-0.298668	2.87337	-8.21406
284	-0.502627		-0.502627	2.86973	-8.21771
285	-0.68547		-0.68547	2.86256	-8.22488
286	-0.850719		-0.850719	2.8511	-8.23633
287	-1.00162		-1.00162	2.83471	-8.25272
288	-1.14114		-1.14114	2.81282	-8.27461
289	-1.27201		-1.27201	2.78495	-8.30248
290	-1.39669		-1.39669	2.75066	-8.33677
291	-1.51745		-1.51745	2.70959	-8.37785
292	-1.63634		-1.63634	2.66138	-8.42605
293	-1.75527		-1.75527	2.60574	-8.48169
294	-1.876		-1.876	2.54237	-8.54507
295	-2.00016		-2.00016	2.47099	-8.61645
296	-2.12931		-2.12931	2.39134	-8.6961
297	-2.26492		-2.26492	2.30316	-8.78427
298	-2.40842		-2.40842	2.20621	-8.88122
299	-2.56122		-2.56122	2.10024	-8.98719
300	-2.7247		-2.7247	1.98503	-9.1024
301	-2.90025		-2.90025	1.86038	-9.22705
302	-3.08927		-3.08927	1.7261	-9.36133
303	-3.29321		-3.29321	1.58206	-9.50537
304	-3.51353		-3.51353	1.42817	-9.65927
305	-3.75174		-3.75174	1.2644	-9.82303
306	-4.00938		-4.00938	1.09082	-9.99661
307	-4.28803		-4.28803	0.907597	-10.1798
308	-4.5893		-4.5893	0.715017	-10.3724
309	-4.9148		-4.9148	0.513516	-10.5739
310	-5.26613		-5.26613	0.303698	-10.7837
311	-5.64483		-5.64483	0.0863547	-11.0011
312	-6.05233		-6.05233	-0.137518	-11.225
313	-6.48988		-6.48988	-0.366703	-11.4541
314	-6.95849		-6.95849	-0.599758	-11.6872
315	-7.45878		-7.45878	-0.835013	-11.9224
316	-7.99085		-7.99085	-1.07058	-12.158
317	-8.55413		-8.55413	-1.30436	-12.3918
318	-9.14716		-9.14716	-1.53409	-12.6215
319	-9.76736		-9.76736	-1.75736	-12.8448
320	-10.4108	-9.30336	-10.4108	-7.23012	-18.3176
321	-11.0717		-11.0717	-7.49541	-18.5828
322	-11.7427		-11.7427	-7.78093	-18.8684
323	-12.4137		-12.4137	-8.06649	-19.1539
324	-13.0727		-13.0727	-8.33264	-19.4201
325	-13.7046		-13.7046	-8.56071	-19.6481
326	-14.2921		-14.2921	-8.7331	-19.8205
327	-14.8159		-14.8159	-8.83379	-19.9212
328	-15.2549		-15.2549	-8.84891	-19.9363
329	-15.5874		-15.5874	-8.76752	-19.855
330	-15.7926		-15.7926	-8.58224	-19.6697
331	-15.8521		-15.8521	-8.28984	-19.3773
332	-15.7516		-15.7516	-7.89154	-18.979
333	-15.4825		-15.4825	-7.39302	-18.4805
334	-15.0436		-15.0436	-6.80408	-17.8915
335	-14.4414		-14.4414	-6.13793	-17.2254
336	-13.6905		-13.6905	-5.41027	-16.4977
337	-12.8121		-12.8121	-4.63823	-15.7257
338	-11.8326		-11.8326	-3.8392	-14.9266
339	-10.7813		-10.7813	-3.02992	-14.1174
340	-9.68825		-9.68825	-2.22557	-13.313
341	-8.58194		-8.58194	-1.43929	-12.5267
342	-7.48768		-7.48768	-0.681807	-11.7692
343	-6.42657		-6.42657	0.0386152	-11.0488
344	-5.41503		-5.41503	0.716107	-10.3713
345	-4.46479		-4.46479	1.34697	-9.74047
346	-3.58328		-3.58328	1.92937	-9.15806
347	-2.7742		-2.7742	2.46305	-8.62439
348	-2.03824		-2.03824	2.94896	-8.13847
349	-1.37371		-1.37371	3.38902	-7.69842
350	-0.77719		-0.77719	3.78578	-7.30165
351	-0.244073		-0.244073	4.14227	-6.94516
352	0.231014		0.231014	4.46176	-6.62568
353	0.653844		0.653844	4.74763	-6.33981
354	1.03033		1.03033	5.00326	-6.08417
355	1.36632		1.36632	5.23197	-5.85547
356	1.66748		1.66748	5.4369	-5.65053
357	1.93918		1.93918	5.62104	-5.46639
358	2.18645		2.18645	5.78717	-5.30027
359	2.41395		2.41395	5.93785	-5.14958
360	2.62597	2.45147	2.62597	11.3129	0.225475
361	2.82642		2.82642	11.0952	0.0077785
362	3.01887		3.01887	10.929	-0.158434
363	3.20657		3.20657	10.8091	-0.278383
364	3.39244		3.39244	10.7307	-0.356725
365	3.57918		3.57918	10.6898	-0.397589
366	3.7692		3.7692	10.6828	-0.40463
367	3.96472		3.96472	10.7064	-0.381075
368	4.16778		4.16778	10.7576	-0.329788
369	4.38024		4.38024	10.8341	-0.25332
370	4.6038		4.6038	10.9335	-0.153968
371	4.84005		4.84005	11.0536	-0.0338266
372	5.09043		5.09043	11.1926	0.105161
373	5.35624		5.35624	11.3486	0.261155
374	5.63867		5.63867	11.5198	0.432377
375	5.93873		5.93873	11.7045	0.617065
376	6.25729		6.25729	11.9009	0.813446
377	6.59497		6.59497	12.1071	1.0197
378	6.95218		6.95218	12.3214	1.23394
379	7.32901		7.32901	12.5416	1.45418
380	7.72517		7.72517	12.7658	1.67837
381	8.13995		8.13995	12.9918	1.90432
382	8.57207		8.57207	13.2172	2.12977
383	9.01963		9.01963	13.4398	2.35236
384	9.47999		9.47999	13.6571	2.56967
385	9.94965		9.94965	13.8667	2.77922
386	10.4241		10.4241	14.066	2.97853
387	10.8979		10.8979	14.2525	3.16511
388	11.3644		11.3644	14.424	3.33653
389	11.8157		11.8157	14.5778	3.49041
390	12.243		12.243	14.7119	3.62444
391	12.6365		12.6365	14.8239	3.73643
392	12.9855		12.9855	14.9117	3.8243
393	13.2789		13.2789	14.9735	3.88605
394	13.5058		13.5058	15.0073	3.91984
395	13.6557		13.6557	15.0114	3.92395
396	13.7196		13.7196	14.9843	3.89683
397	13.69		13.69	14.9246	3.83714
398	13.5623		13.5623	14.8312	3.7438
399	13.3349		13.3349	14.7035	3.61606
400	13.0095	12.7623	13.0095	22.4799	11.3925
401	12.5913		12.5913	21.3034	10.216
402	12.0889		12.0889	20.0624	8.97496
403	11.5138		11.5138	18.7792	7.69176
404	10.8795		10.8795	17.4792	6.39173
405	10.2009		10.2009	16.1878	5.10036
406	9.49338		9.49338	14.9283	3.84091
407	8.77202		8.77202	13.7203	2.63289
408	8.05076		8.05076	12.5787	1.49123
409	7.34198		7.34198	11.5137	0.426258
410	6.65614		6.65614	10.5314	-0.556067
411	6.00161		6.00161	9.63394	-1.45349
412	5.38469		5.38469	8.82067	-2.26676
413	4.80974		4.80974	8.08854	-2.99889
414	4.27935		4.27935	7.43292	-3.65451
415	3.79461		3.79461	6.84815	-4.23929
416	3.35539		3.35539	6.32796	-4.75948
417	2.96057		2.96057	5.86585	-5.22158
418	2.6083		2.6083	5.45535	-5.63209
419	2.29623		2.29623	5.09015	-5.99728
420	2.02164		2.02164	4.76431	-6.32312
421	1.78164		1.78164	4.47227	-6.61517
422	1.57327		1.57327	4.20889	-6.87855
423	1.39362		1.39362	3.96951	-7.11792
424	1.23984		1.23984	3.74994	-7.3375
425	1.10926		1.10926	3.5464	-7.54103
426	0.999381		0.999381	3.35557	-7.73186
427	0.907903		0.907903	3.1745	-7.91294
428	0.832745		0.832745	3.00062	-8.08682
429	0.772041		0.772041	2.83171	-8.25573
430	0.724136		0.724136	2.66586	-8.42158
431	0.687579		0.687579	2.50146	-8.58597
432	0.661112		0.661112	2.33718	-8.75025
433	0.643658		0.643658	2.17194	-8.9155
434	0.634309		0.634309	2.00487	-9.08256
435	0.632311		0.632311	1.83538	-9.25206
436	0.637051		0.637051	1.66305	-9.42439
437	0.648047		0.648047	1.48768	-9.59975
438	0.664937		0.664937	1.3093	-9.77813
439	0.687464		0.687464	1.12812	-9.95932
440	0.715475	-0.224585	0.715475	10.1881	-0.899315
441	0.748907		0.748907	9.79424	-1.2932
442	0.787785		0.787785	9.51673	-1.57071
443	0.832214		0.832214	9.33767	-1.74977
444	0.882381		0.882381	9.24238	-1.84506
445	0.938543		0.938543	9.219	-1.86844
446	1.00104		1.00104	9.25802	-1.82942
447	1.07027		1.07027	9.35187	-1.73556
448	1.14672		1.14672	9.49453	-1.5929
449	1.23097		1.23097	9.6812	-1.40624
450	1.32363		1.32363	9.90794	-1.17949
451	1.42545		1.42545	10.1715	-0.915964
452	1.53723		1.53723	10.4688	-0.618602
453	1.65988		1.65988	10.7972	-0.29025
454	1.7944		1.7944	11.1536	0.0661331
455	1.94191		1.94191	11.5347	0.447252
456	2.10364		2.10364	11.9367	0.849291
457	2.28092		2.28092	12.3552	1.26776
458	2.47522		2.47522	12.7848	1.69737
459	2.68817		2.68817	13.2195	2.13202
460	2.92148		2.92148	13.6522	2.56475
461	3.17707		3.17707	14.0753	2.9879
462	3.45695		3.45695	14.4807	3.39327
463	3.7633		3.7633	14.8598	3.77232
464	4.09842		4.09842	15.2039	4.1165
465	4.46473		4.46473	15.5049	4.41747
466	4.86474		4.86474	15.7548	4.6674
467	5.301		5.301	15.9465	4.8591
468	5.77604		5.77604	16.0737	4.98622
469	6.29229		6.29229	16.1308	5.04333
470	6.85197		6.85197	16.1134	5.02601
471	7.45689		7.45689	16.0185	4.93105
472	8.10829		8.10829	15.8441	4.75665
473	8.80653		8.80653	15.5901	4.50266
474	9.55076		9.55076	15.2583	4.17091
475	10.3385		10.3385	14.8527	3.76529
476	11.1652		11.1652	14.3793	3.29183
477	12.0234		12.0234	13.846	2.75855
478	12.9026		12.9026	13.2626	2.17514
479	13.7881		13.7881	12.64	1.55255
480	14.6609	12.516	14.6609	18.2647	7.1773
481	15.497		15.497	21.0009	9.91348
482	16.2674		16.2674	23.7438	12.6563
483	16.9391		16.9391	26.4793	15.3919
484	17.4758		17.4758	29.1417	18.0543
485	17.8404		17.8404	31.6048	20.5174
486	17.9979		17.9979	33.6783	22.5909
487	17.9192		17.9192	35.115	24.0275
488	17.5848		17.5848	35.6391	24.5516
489	16.9884		16.9884	35.0014	23.9139
490	16.1389		16.1389	33.0539	21.9664
491	15.0608		15.0608	29.8186	18.7312
492	13.7917		13.7917	25.5112	14.4237
493	12.3789		12.3789	20.4943	9.40688
494	10.874		10.874	15.1777	4.09027
495	9.32791		9.32791	9.91661	-1.17082
496	7.78652		7.78652	4.95693	-6.1305
497	6.28799		6.28799	0.4364	-10.651
498	4.86139		4.86139	-3.58024	-14.6677
499	3.52674		3.52674	-7.05949	-18.1469
500	2.29595		2.29595	-9.96753	-21.055
501	1.17421		1.17421	-12.254	-23.3414
502	0.161533		0.161533	-13.8514	-24.9388
503	-0.745793		-0.745793	-14.6878	-25.7752
504	-1.55399		-1.55399	-14.7092	-25.7966
505	-2.27079		-2.27079	-13.9048	-24.9922
506	-2.90471		-2.90471	-12.3251	-23.4126
507	-3.46449		-3.46449	-10.0855	-21.1729
508	-3.95873		-3.95873	-7.35077	-18.4382
509	-4.39563		-4.39563	-4.30894	-15.3964
510	-4.78286		-4.78286	-1.14229	-12.2297
511	-5.12749		-5.12749	1.99323	-9.09421
512	-5.43589		-5.43589	4.97727	-6.11016
513	-5.7138		-5.7138	7.72433	-3.3631
514	-5.96631		-5.96631	10.177	-0.910407
515	-6.19789		-6.19789	12.2978	1.21037
516	-6.41245		-6.41245	14.0621	2.97468
517	-6.61334		-6.61334	15.4543	4.36689
518	-6.80346		-6.80346	16.4666	5.37919
519	-6.9852		-6.9852	17.1	6.01252
520	-7.16059	-6.14472	-7.16059	-2.97814	-14.0656
521	-7.33124		-7.33124	-2.83264	-13.9201
522	-7.49842		-7.49842	-2.7254	-13.8128
523	-7.66309		-7.66309	-2.6516	-13.739
524	-7.8259		-7.8259	-2.60696	-13.6944
525	-7.98724		-7.98724	-2.58773	-13.6752
526	-8.14722		-8.14722	-2.59053	-13.678
527	-8.30575		-8.30575	-2.61236	-13.6998
528	-8.46248		-8.46248	-2.65048	-13.7379
529	-8.6169		-8.6169	-2.70239	-13.7898
530	-8.76829		-8.76829	-2.7658	-13.8532
531	-8.91576		-8.91576	-2.83854	-13.926
532	-9.05828		-9.05828	-2.91856	-14.006
533	-9.1947		-9.1947	-3.00393	-14.0914
534	-9.32374		-9.32374	-3.09277	-14.1802
535	-9.44407		-9.44407	-3.18327	-14.2707
536	-9.55429		-9.55429	-3.27369	-14.3611
537	-9.65301		-9.65301	-3.36236	-14.4498
538	-9.73885		-9.73885	-3.44771	-14.5351
539	-9.81048		-9.81048	-3.52828	-14.6157
540	-9.86668		-9.86668	-3.60276	-14.6902
541	-9.90637		-9.90637	-3.66998	-14.7574
542	-9.92865		-9.92865	-3.72898	-14.8164
543	-9.93283		-9.93283	-3.77899	-14.8664
544	-9.91847		-9.91847	-3.81938	-14.9068
545	-9.88541		-9.88541	-3.84973	-14.9372
546	-9.83376		-9.83376	-3.86971	-14.9571
547	-9.76396		-9.76396	-3.87906	-14.9665
548	-9.67673		-9.67673	-3.87756	-14.965
549	-9.57308		-9.57308	-3.86499	-14.9524
550	-9.45432		-9.45432	-3.84108	-14.9285
551	-9.32197		-9.32197	-3.80553	-14.893
552	-9.17778		-9.17778	-3.75805	-14.8455
553	-9.02367		-9.02367	-3.69835	-14.7858
554	-8.86166		-8.86166	-3.62622	-14.7137
555	-8.69386		-8.69386	-3.54161	-14.629
556	-8.52242		-8.52242	-3.44463	-14.5321
557	-8.34946		-8.34946	-3.33568	-14.4231
558	-8.17704		-8.17704	-3.21541	-14.3028
559	-8.00714		-8.00714	-3.08475	-14.1722
560	-7.84161	-7.78244	-7.84161	-1.85682	-12.9443
561	-7.68218		-7.68218	-1.90775	-12.9952
562	-7.53039		-7.53039	-1.93563	-13.0231
563	-7.38763		-7.38763	-1.94357	-13.031
564	-7.25512		-7.25512	-1.93451	-13.0219
565	-7.1339		-7.1339	-1.91113	-12.9986
566	-7.02484		-7.02484	-1.87595	-12.9634
567	-6.92867		-6.92867	-1.83126	-12.9187
568	-6.84596		-6.84596	-1.77921	-12.8666
569	-6.77715		-6.77715	-1.72176	-12.8092
570	-6.72257		-6.72257	-1.66074	-12.7482
571	-6.68242		-6.68242	-1.59785	-12.6853
572	-6.65684		-6.65684	-1.53465	-12.6221
573	-6.64586		-6.64586	-1.47262	-12.5601
574	-6.64946		-6.64946	-1.41306	-12.5005
575	-6.66753		-6.66753	-1.35721	-12.4446
576	-6.69994		-6.69994	-1.30616	-12.3936
577	-6.74648		-6.74648	-1.26087	-12.3483
578	-6.80691		-6.80691	-1.2222	-12.3096
579	-6.88096		-6.88096	-1.19089	-12.2783
580	-6.96827		-6.96827	-1.16754	-12.255
581	-7.06847		-7.06847	-1.15265	-12.2401
582	-7.18111		-7.18111	-1.14661	-12.234
583	-7.3057		-7.3057	-1.14969	-12.2371
584	-7.44165		-7.44165	-1.16207	-12.2495
585	-7.58832		-7.58832	-1.1838	-12.2712
586	-7.74495		-7.74495	-1.21485	-12.3023
587	-7.91068		-7.91068	-1.25511	-12.3425
588	-8.08454		-8.08454	-1.30436	-12.3918
589	-8.26541		-8.26541	-1.36229	-12.4497
590	-8.45203		-8.45203	-1.42853	-12.516
591	-8.64298		-8.64298	-1.50264	-12.5901
592	-8.83669		-8.83669	-1.58412	-12.6716
593	-9.03138		-9.03138	-1.67241	-12.7598
594	-9.22513		-9.22513	-1.76691	-12.8543
595	-9.41583		-9.41583	-1.867	-12.9544
596	-9.6012		-9.6012	-1.97204	-13.0595
597	-9.77885		-9.77885	-2.08137	-13.1688
598	-9.94626		-9.94626	-2.19433	-13.2818
599	-10.1008		-10.1008	-2.31023	-13.3977
600	-10.2399	-11.5319	-10.2399	-4.84424	-15.9317
601	-10.361		-10.361	-5.08226	-16.1697
602	-10.4615		-10.4615	-5.23511	-16.3225
603	-10.5391		-10.5391	-5.30491	-16.3923
604	-10.5918		-10.5918	-5.29465	-16.3821
605	-10.6178		-10.6178	-5.2084	-16.2958
606	-10.6159		-10.6159	-5.05138	-16.1388
607	-10.585		-10.585	-4.82993	-15.9174
608	-10.5249		-10.5249	-4.55146	-15.6389
609	-10.4358		-10.4358	-4.22419	-15.3116
610	-10.3185		-10.3185	-3.85695	-14.9444
611	-10.1744		-10.1744	-3.45881	-14.5462
612	-10.0053		-10.0053	-3.03878	-14.1262
613	-9.81363		-9.81363	-2.60548	-13.6929
614	-9.60223		-9.60223	-2.16693	-13.2544
615	-9.37423		-9.37423	-1.7303	-12.8177
616	-9.13301		-9.13301	-1.30183	-12.3893
617	-8.8821		-8.8821	-0.886751	-11.9742
618	-8.62504		-8.62504	-0.489342	-11.5768
619	-8.36535		-8.36535	-0.112927	-11.2004
620	-8.10637		-8.10637	0.240027	-10.8474
621	-7.85126		-7.85126	0.567819	-10.5196
622	-7.60292		-7.60292	0.869421	-10.218
623	-7.36394		-7.36394	1.14437	-9.94306
624	-7.13658		-7.13658	1.39267	-9.69476
625	-6.9228		-6.9228	1.6147	-9.47273
626	-6.72421		-6.72421	1.81113	-9.27631
627	-6.54212		-6.54212	1.98283	-9.1046
628	-6.37756		-6.37756	2.13083	-8.9566
629	-6.23127		-6.23127	2.25624	-8.83119
630	-6.10379		-6.10379	2.36021	-8.72722
631	-5.99545		-5.99545	2.44389	-8.64355
632	-5.90641		-5.90641	2.50839	-8.57905
633	-5.83672		-5.83672	2.55478	-8.53265
634	-5.78628		-5.78628	2.58406	-8.50337
635	-5.75496		-5.75496	2.59714	-8.4903
636	-5.74253		-5.74253	2.59483	-8.4926
637	-5.74874		-5.74874	2.57786	-8.50957
638	-5.77332		-5.77332	2.54687	-8.54056
639	-5.81599		-5.81599	2.50238	-8.58505
640	-5.87645	-2.67951	-5.87645	1.44716	-9.64027
641	-5.95442		-5.95442	1.23028	-9.85715
642	-6.0496		-6.0496	1.01197	-10.0755
643	-6.16171		-6.16171	0.790446	-10.297
644	-6.29045		-6.29045	0.564186	-10.5232
645	-6.4355		-6.4355	0.331901	-10.7555
646	-6.59652		-6.59652	0.0925643	-10.9949
647	-6.77311		-6.77311	-0.15458	-11.242
648	-6.96482		-6.96482	-0.410012	-11.4974
649	-7.17111		-7.17111	-0.67392	-11.7614
650	-7.39132		-7.39132	-0.946191	-12.0336
651	-7.62464		-7.62464	-1.2264	-12.3138
652	-7.87012		-7.87012	-1.5138	-12.6012
653	-8.12658		-8.12658	-1.80728	-12.8947
654	-8.3926		-8.3926	-2.10543	-13.1929
655	-8.6665		-8.6665	-2.40645	-13.4939
656	-8.9463		-8.9463	-2.70822	-13.7957
657	-9.22967		-9.22967	-3.00827	-14.0957
658	-9.51394		-9.51394	-3.30385	-14.3913
659	-9.79605		-9.79605	-3.59189	-14.6793
660	-10.0726		-10.0726	-3.86914	-14.9566
661	-10.3398		-10.3398	-4.13214	-15.2196
662	-10.5936		-10.5936	-4.37733	-15.4648
663	-10.8295		-10.8295	-4.60112	-15.6886
664	-11.0431		-11.0431	-4.79995	-15.8874
665	-11.2297		-11.2297	-4.97043	-16.0579
666	-11.3848		-11.3848	-5.10938	-16.1968
667	-11.5041		-11.5041	-5.21393	-16.3014
668	-11.5834		-11.5834	-5.28165	-16.3691
669	-11.6196		-11.6196	-5.31056	-16.398
670	-11.61		-11.61	-5.29925	-16.3867
671	-11.5529		-11.5529	-5.24689	-16.3343
672	-11.4477		-11.4477	-5.15332	-16.2408
673	-11.2949		-11.2949	-5.019	-16.1064
674	-11.0962		-11.0962	-4.84508	-15.9325
675	-10.8544		-10.8544	-4.63335	-15.7208
676	-10.5734		-10.5734	-4.38619	-15.4736
677	-10.2581		-10.2581	-4.10655	-15.194
678	-9.91405		-9.91405	-3.79782	-14.8853
679	-9.5472		-9.5472	-3.46379	-14.5512
680	-9.16389	-9.9907	-9.16389	-4.92168	-16.0091
681	-8.77045		-8.77045	-4.20945	-15.2969
682	-8.37305		-8.37305	-3.52825	-14.6157
683	-7.97745		-7.97745	-2.88245	-13.9699
684	-7.58894		-7.58894	-2.27565	-13.3631
685	-7.21217		-7.21217	-1.71048	-12.7979
686	-6.85114		-6.85114	-1.18859	-12.276
687	-6.50914		-6.50914	-0.710758	-11.7982
688	-6.18879		-6.18879	-0.276936	-11.3644
689	-5.89207		-5.89207	0.113583	-10.9739
690	-5.62036		-5.62036	0.462041	-10.6254
691	-5.37456		-5.37456	0.770083	-10.3174
692	-5.15507		-5.15507	1.03964	-10.0478
693	-4.96198		-4.96198	1.27281	-9.81462
694	-4.79507		-4.79507	1.47181	-9.61563
695	-4.65388		-4.65388	1.63883	-9.4486
696	-4.53782		-4.53782	1.77607	-9.31137
697	-4.4462		-4.4462	1.8856	-9.20183
698	-4.37825		-4.37825	1.96942	-9.11801
699	-4.33322		-4.33322	2.02936	-9.05807
700	-4.31036		-4.31036	2.06712	-9.02032
701	-4.30897		-4.30897	2.08421	-9.00322
702	-4.32844		-4.32844	2.08203	-9.00541
703	-4.3682		-4.3682	2.06178	-9.02566
704	-4.42781		-4.42781	2.02453	-9.0629
705	-4.5069		-4.5069	1.97123	-9.1162
706	-4.60521		-4.60521	1.90267	-9.18476
707	-4.72257		-4.72257	1.81955	-9.26788
708	-4.8589		-4.8589	1.72247	-9.36496
709	-5.01419		-5.01419	1.61195	-9.47549
710	-5.18852		-5.18852	1.48844	-9.59899
711	-5.38199		-5.38199	1.35237	-9.73506
712	-5.59475		-5.59475	1.20413	-9.88331
713	-5.82696		-5.82696	1.04411	-10.0433
714	-6.07875		-6.07875	0.872742	-10.2147
715	-6.3502		-6.3502	0.690483	-10.397
716	-6.64129		-6.64129	0.497878	-10.5896
717	-6.95189		-6.95189	0.295567	-10.7919
718	-7.28163		-7.28163	0.0843223	-11.0031
719	-7.62993		-7.62993	-0.134925	-11.2224
720	-7.99587	-5.32113	-7.99587	1.02151	-10.0659
721	-8.37814		-8.37814	0.246511	-10.8409
722	-8.77493		-8.77493	-0.486064	-11.5735
723	-9.18389		-9.18389	-1.18648	-12.2739
724	-9.60202		-9.60202	-1.86284	-12.9503
725	-10.0255		-10.0255	-2.52105	-13.6085
726	-10.4499		-10.4499	-3.16487	-14.2523
727	-10.8697		-10.8697	-3.79594	-14.8834
728	-11.2786		-11.2786	-4.41375	-15.5012
729	-11.6695		-11.6695	-5.01569	-16.1031
730	-12.0343		-12.0343	-5.59712	-16.6846
731	-12.3645		-12.3645	-6.15141	-17.2388
732	-12.6511		-12.6511	-6.67014	-17.7576
733	-12.8849		-12.8849	-7.14333	-18.2308
734	-13.0571		-13.0571	-7.55986	-18.6473
735	-13.1596		-13.1596	-7.90796	-18.9954
736	-13.1857		-13.1857	-8.17585	-19.2633
737	-13.1302		-13.1302	-8.35248	-19.4399
738	-12.9903		-12.9903	-8.42836	-19.5158
739	-12.7657		-12.7657	-8.39631	-19.4837
740	-12.4586		-12.4586	-8.25218	-19.3396
741	-12.0743		-12.0743	-7.9954	-19.0828
742	-11.6202		-11.6202	-7.62919	-18.7166
743	-11.1063		-11.1063	-7.16062	-18.2481
744	-10.5437		-10.5437	-6.60021	-17.6876
745	-9.94492		-9.94492	-5.96135	-17.0488
746	-9.32243		-9.32243	-5.25944	-16.3469
747	-8.6886		-8.6886	-4.51096	-15.5984
748	-8.05493		-8.05493	-3.73251	-14.8199
749	-7.4317		-7.4317	-2.93992	-14.0274
750	-6.82771		-6.82771	-2.14762	-13.2351
751	-6.25012		-6.25012	-1.36814	-12.4556
752	-5.70448		-5.70448	-0.611872	-11.6993
753	-5.19476		-5.19476	0.11296	-10.9745
754	-4.72354		-4.72354	0.800252	-10.2872
755	-4.29213		-4.29213	1.44582	-9.64162
756	-3.90081		-3.90081	2.04715	-9.04028
757	-3.54904		-3.54904	2.60319	-8.48424
758	-3.23562		-3.23562	3.11406	-7.97337
759	-2.95886		-2.95886	3.58081	-7.50662
760	-2.71677	-2.46274	-2.71677	1.64762	-9.43981
761	-2.50716		-2.50716	1.347	-9.74043
762	-2.32775		-2.32775	1.06846	-10.019
763	-2.17625		-2.17625	0.807822	-10.2796
764	-2.05043		-2.05043	0.561402	-10.526
765	-1.9482		-1.9482	0.326034	-10.7614
766	-1.86757		-1.86757	0.0990406	-10.9884
767	-1.80675		-1.80675	-0.121798	-11.2092
768	-1.76415		-1.76415	-0.338278	-11.4257
769	-1.73833		-1.73833	-0.551804	-11.6392
770	-1.72808		-1.72808	-0.763429	-11.8509
771	-1.73237		-1.73237	-0.973885	-12.0613
772	-1.75036		-1.75036	-1.18361	-12.271
773	-1.7814		-1.7814	-1.39278	-12.4802
774	-1.825		-1.825	-1.60133	-12.6888
775	-1.88085		-1.88085	-1.80895	-12.8964
776	-1.94879		-1.94879	-2.01513	-13.1026
777	-2.02883		-2.02883	-2.21916	-13.3066
778	-2.12111		-2.12111	-2.42014	-13.5076
779	-2.22591		-2.22591	-2.61699	-13.7044
780	-2.34366		-2.34366	-2.80848	-13.8959
781	-2.47491		-2.47491	-2.99321	-14.0806
782	-2.62035		-2.62035	-3.16969	-14.2571
783	-2.78077		-2.78077	-3.33634	-14.4238
784	-2.9571		-2.9571	-3.4915	-14.5789
785	-3.15041		-3.15041	-3.63353	-14.721
786	-3.36184		-3.36184	-3.76082	-14.8482
787	-3.59268		-3.59268	-3.87184	-14.9593
788	-3.8443		-3.8443	-3.96523	-15.0527
789	-4.11817		-4.11817	-4.03981	-15.1272
790	-4.41584		-4.41584	-4.09469	-15.1821
791	-4.73892		-4.73892	-4.12922	-15.2166
792	-5.08904		-5.08904	-4.14309	-15.2305
793	-5.46783		-5.46783	-4.13632	-15.2238
794	-5.87685		-5.87685	-4.10921	-15.1966
795	-6.31753		-6.31753	-4.06232	-15.1498
796	-6.79109		-6.79109	-3.99643	-15.0839
797	-7.29841		-7.29841	-3.91249	-14.9999
798	-7.8399		-7.8399	-3.8115	-14.8989
799	-8.41531		-8.41531	-3.69456	-14.782
800	-9.02354	-5.85429	-9.02354	4.23441	-6.85303
801	-9.66239		-9.66239	3.33533	-7.75211
802	-10.3282		-10.3282	2.48938	-8.59805
803	-11.0157		-11.0157	1.65911	-9.42833
804	-11.7174		-11.7174	0.814313	-10.2731
805	-12.4236		-12.4236	-0.0695233	-11.157
806	-13.1218		-13.1218	-1.01227	-12.0997
807	-13.7968		-13.7968	-2.02958	-13.117
808	-14.4303		-14.4303	-3.13275	-14.2202
809	-15.0018		-15.0018	-4.32793	-15.4154
810	-15.4884		-15.4884	-5.61467	-16.7021
811	-15.8664		-15.8664	-6.98399	-18.0714
812	-16.1125		-16.1125	-8.41585	-19.5033
813	-16.2056		-16.2056	-9.87673	-20.9642
814	-16.1286		-16.1286	-11.3178	-22.4052
815	-15.8709		-15.8709	-12.6746	-23.7621
816	-15.4294		-15.4294	-13.8698	-24.9572
817	-14.8101		-14.8101	-14.8179	-25.9053
818	-14.0278		-14.0278	-15.4341	-26.5215
819	-13.1051		-13.1051	-15.6428	-26.7302
820	-12.0708		-12.0708	-15.3858	-26.4733
821	-10.9571		-10.9571	-14.6296	-25.7171
822	-9.79696		-9.79696	-13.3702	-24.4577
823	-8.62189		-8.62189	-11.6377	-22.7252
824	-7.45975		-7.45975	-9.49642	-20.5839
825	-6.33367		-6.33367	-7.03928	-18.1267
826	-5.26146		-5.26146	-4.3759	-15.4633
827	-4.25571		-4.25571	-1.61722	-12.7047
828	-3.32421		-3.32421	1.13792	-9.94952
829	-2.47067		-2.47067	3.81032	-7.27712
830	-1.6955		-1.6955	6.34091	-4.74653
831	-0.99658		-0.99658	8.68612	-2.40131
832	-0.369957		-0.369957	10.8117	-0.275779
833	0.189553		0.189553	12.6876	1.6002
834	0.687887		0.687887	14.2865	3.19907
835	1.13136		1.13136	15.5836	4.49613
836	1.52638		1.52638	16.5591	5.47164
837	1.87926		1.87926	17.2009	6.1135
838	2.19604		2.19604	17.5071	6.41965
839	2.48245		2.48245	17.4872	6.39974
840	2.74382	2.2156	2.74382	6.76013	-4.3273
841	2.98507		2.98507	7.02319	-4.06424
842	3.21067		3.21067	7.26638	-3.82105
843	3.42474		3.42474	7.49338	-3.59406
844	3.63096		3.63096	7.70766	-3.37977
845	3.83268		3.83268	7.91252	-3.17492
846	4.03291		4.03291	8.11096	-2.97647
847	4.23434		4.23434	8.30578	-2.78165
848	4.43942		4.43942	8.49949	-2.58795
849	4.65033		4.65033	8.69436	-2.39307
850	4.86901		4.86901	8.89245	-2.19499
851	5.09722		5.09722	9.09558	-1.99185
852	5.3365		5.3365	9.30538	-1.78206
853	5.58822		5.58822	9.52326	-1.56418
854	5.85356		5.85356	9.75043	-1.337
855	6.13349		6.13349	9.98793	-1.09951
856	6.42878		6.42878	10.2365	-0.850888
857	6.73997		6.73997	10.4969	-0.590561
858	7.06734		7.06734	10.7693	-0.318181
859	7.41085		7.41085	11.0538	-0.0336636
860	7.77011		7.77011	11.3502	0.26279
861	8.14435		8.14435	11.6581	0.57066
862	8.53228		8.53228	11.9765	0.889087
863	8.9321		8.9321	12.3043	1.21684
864	9.34134		9.34134	12.6397	1.55228
865	9.75688		9.75688	12.9808	1.89336
866	10.1748		10.1748	13.325	2.23761
867	10.5903		10.5903	13.6695	2.58208
868	10.9979		10.9979	14.0108	2.9234
869	11.3911		11.3911	14.3452	3.25776
870	11.7627		11.7627	14.6683	3.58088
871	12.1046		12.1046	14.9755	3.88809
872	12.4085		12.4085	15.2617	4.1743
873	12.6656		12.6656	15.5215	4.43408
874	12.8673		12.8673	15.7491	4.66169
875	13.0054		13.0054	15.9386	4.85121
876	13.0728		13.0728	16.0841	4.99669
877	13.0636		13.0636	16.1798	5.09234
878	12.9739		12.9739	16.2202	5.13278
879	12.802		12.802	16.2008	5.11338
880	12.5488	12.5235	12.5488	13.7806	2.69321
881	12.2177		12.2177	13.7497	2.66229
882	11.8147		11.8147	13.637	2.54958
883	11.3479		11.3479	13.4537	2.36624
884	10.8274		10.8274	13.2113	2.12383
885	10.2646		10.2646	12.9214	1.83396
886	9.6715		9.6715	12.5954	1.50801
887	9.06011		9.06011	12.2442	1.15677
888	8.44205		8.44205	11.8776	0.790192
889	7.82798		7.82798	11.5046	0.417185
890	7.2273		7.2273	11.1329	0.0454806
891	6.64793		6.64793	10.769	-0.318416
892	6.09623		6.09623	10.4182	-0.669221
893	5.57703		5.57703	10.0846	-1.0028
894	5.09372		5.09372	9.77133	-1.3161
895	4.64838		4.64838	9.48045	-1.60699
896	4.24197		4.24197	9.2133	-1.87413
897	3.87455		3.87455	8.97053	-2.11691
898	3.54538		3.54538	8.75222	-2.33521
899	3.25321		3.25321	8.55806	-2.52938
900	2.99635		2.99635	8.38737	-2.70007
901	2.77285		2.77285	8.23927	-2.84817
902	2.58059		2.58059	8.11271	-2.97472
903	2.41742		2.41742	8.00657	-3.08087
904	2.28118		2.28118	7.91968	-3.16776
905	2.16981		2.16981	7.85088	-3.23655
906	2.08134		2.08134	7.79907	-3.28837
907	2.01397		2.01397	7.76318	-3.32425
908	1.96607		1.96607	7.74227	-3.34517
909	1.93618		1.93618	7.73545	-3.35198
910	1.92304		1.92304	7.74196	-3.34547
911	1.92558		1.92558	7.76113	-3.32631
912	1.94292		1.94292	7.79239	-3.29505
913	1.97437		1.97437	7.83528	-3.25215
914	2.0194		2.0194	7.88943	-3.198
915	2.07768		2.07768	7.95457	-3.13287
916	2.14901		2.14901	8.03047	-3.05696
917	2.23338		2.23338	8.11703	-2.97041
918	2.33093		2.33093	8.21415	-2.87328
919	2.44191		2.44191	8.32182	-2.76561
920	2.56675	4.06564	2.56675	11.4895	0.402054
921	2.706		2.706	11.4526	0.365214
922	2.86034		2.86034	11.4869	0.399497
923	3.03058		3.03058	11.5841	0.496645
924	3.21765		3.21765	11.7372	0.649772
925	3.42259		3.42259	11.9405	0.853077
926	3.64657		3.64657	12.189	1.10157
927	3.89084		3.89084	12.4783	1.39083
928	4.15675		4.15675	12.8042	1.71674
929	4.44574		4.44574	13.1627	2.07527
930	4.75927		4.75927	13.5497	2.46228
931	5.09886		5.09886	13.9607	2.87327
932	5.46601		5.46601	14.3907	3.3033
933	5.86215		5.86215	14.8342	3.74674
934	6.2886		6.2886	15.2847	4.19729
935	6.74646		6.74646	15.7353	4.64785
936	7.23654		7.23654	16.1781	5.09062
937	7.75918		7.75918	16.6046	5.51712
938	8.31414		8.31414	17.0059	5.91843
939	8.90037		8.90037	17.3728	6.28533
940	9.51579		9.51579	17.696	6.60861
941	10.157		10.157	17.9668	6.87934
942	10.8192		10.8192	18.1766	7.08915
943	11.4954		11.4954	18.318	7.23057
944	12.1767		12.1767	18.3847	7.29729
945	12.8516		12.8516	18.3719	7.28448
946	13.5061		13.5061	18.2765	7.18907
947	14.1236		14.1236	18.0974	7.00992
948	14.685		14.685	17.8355	6.74803
949	15.1693		15.1693	17.494	6.40654
950	15.5544		15.5544	17.0781	5.99062
951	15.8184		15.8184	16.5947	5.50732
952	15.9411		15.9411	16.0526	4.96515
953	15.9058		15.9058	15.4612	4.37376
954	15.7012		15.7012	14.8309	3.74349
955	15.3227		15.3227	14.1723	3.08491
956	14.774		14.774	13.4959	2.40848
957	14.0667		14.0667	12.8116	1.72414
958	13.2201		13.2201	12.1286	1.04113
959	12.2595		12.2595	11.4551	0.367666
960	11.2143	7.0157	11.2143	22.106	11.0186
961	10.1152		10.1152	20.968	9.88052
962	8.99238		8.99238	19.6398	8.5524
963	7.87301		7.87301	18.1683	7.08084
964	6.7804		6.7804	16.6055	5.51809
965	5.73309		5.73309	15.0037	3.91626
966	4.74472		4.74472	13.41	2.32254
967	3.82433		3.82433	11.8634	0.775988
968	2.9769		2.9769	10.3935	-0.69389
969	2.20407		2.20407	9.02034	-2.06709
970	1.50482		1.50482	7.75538	-3.33205
971	0.87614		0.87614	6.60335	-4.48409
972	0.313646		0.313646	5.56372	-5.52371
973	-0.187964		-0.187964	4.63234	-6.45509
974	-0.634504		-0.634504	3.80266	-7.28477
975	-1.032		-1.032	3.06678	-8.02065
976	-1.38647		-1.38647	2.4162	-8.67123
977	-1.70378		-1.70378	1.84232	-9.24512
978	-1.9895		-1.9895	1.33679	-9.75065
979	-2.24887		-2.24887	0.891735	-10.1957
980	-2.48678		-2.48678	0.499875	-10.5876
981	-2.70769		-2.70769	0.154558	-10.9329
982	-2.91572		-2.91572	-0.150219	-11.2377
983	-3.11459		-3.11459	-0.419835	-11.5073
984	-3.3077		-3.3077	-0.659082	-11.7465
985	-3.49811		-3.49811	-0.87221	-11.9596
986	-3.68861		-3.68861	-1.06297	-12.1504
987	-3.88173		-3.88173	-1.23468	-12.3221
988	-4.07975		-4.07975	-1.39023	-12.4777
989	-4.28475		-4.28475	-1.53217	-12.6196
990	-4.49865		-4.49865	-1.66269	-12.7501
991	-4.72318		-4.72318	-1.78372	-12.8712
992	-4.95991		-4.95991	-1.89687	-12.9843
993	-5.21029		-5.21029	-2.00356	-13.091
994	-5.47559		-5.47559	-2.10493	-13.1924
995	-5.75696		-5.75696	-2.20196	-13.2894
996	-6.05535		-6.05535	-2.29541	-13.3828
997	-6.37156		-6.37156	-2.38589	-13.4733
998	-6.70613		-6.70613	-2.47382	-13.5613
999	-7.05937		-7.05937	-2.55951	-13.6469
