# Supplementary material for: Data assimilation with an improved particle filter and its application in the TRIGRS landslide model
Source: Copernicus journal article supplement (doi:10.5194/nhess-18-2801-2018), 2018-10-26
Supplement: Supplementary file 2 [file Data set of Fig.3.xlsx]

## Sheet: particles
Step	Particles' value
	1	2	3	4	5	6	7	8	9	10	11	12	13	14	15	16	17	18	19	20
0	0.401483	0.481423	1.71481	1.82563	1.61849	3.46856	1.8354	0.961345	2.20889	-1.08177	1.20108	0.247724	2.10827	1.14847	0.598321	3.24732	1.39648	2.67905	4.7214	0.803557
1	0.32685	0.14666	1.28366	1.48636	1.45222	3.23497	1.73316	0.721758	1.99521	-1.1411	1.00822	0.240885	1.60283	0.933577	0.344381	2.75685	1.07703	2.21837	4.15882	0.579143
2	0.260777	-0.151113	0.900907	1.18567	1.3054	3.036	1.64689	0.510786	1.80159	-1.19431	0.840113	0.235685	1.16018	0.745983	0.118884	2.32871	0.794057	1.81059	3.66065	0.380519
3	0.202483	-0.415973	0.561949	0.920189	1.17681	2.86923	1.57566	0.325203	1.62768	-1.24288	0.694129	0.23207	0.772793	0.582605	-0.0812701	1.95674	0.544022	1.45119	3.22261	0.204942
4	0.151189	-0.651966	0.262108	0.686436	1.06511	2.73228	1.51857	0.16191	1.47278	-1.28819	0.567757	0.229988	0.433543	0.440527	-0.25914	1.6349	0.323376	1.13549	2.84009	0.0497216
5	0.106125	-0.863013	-0.00322095	0.480985	0.968955	2.6229	1.47474	0.0179782	1.336	-1.33149	0.458648	0.229388	0.135771	0.317032	-0.417681	1.35749	0.128658	0.858855	2.50833	-0.0877287
6	0.0665555	-1.05285	-0.238477	0.300516	0.887017	2.539	1.44334	-0.109326	1.21627	-1.37393	0.364627	0.23023	-0.126653	0.209614	-0.559702	1.11915	-0.0434468	0.616806	2.22262	-0.209859
7	0.0317819	-1.225	-0.447867	0.141875	0.818011	2.47865	1.42364	-0.222528	1.11244	-1.41655	0.283708	0.23248	-0.359321	0.115988	-0.687843	0.914935	-0.196064	0.405074	1.97839	-0.318962
8	0.001152	-1.38274	-0.635329	0.00210391	0.760723	2.44015	1.41496	-0.323942	1.02333	-1.46032	0.214087	0.236113	-0.567295	0.0340843	-0.804559	0.740357	-0.332108	0.219667	1.77131	-0.417163
9	-0.0259377	-1.52909	-0.80451	-0.121537	0.71403	2.42201	1.41674	-0.415676	0.947744	-1.50611	0.154146	0.241117	-0.755133	-0.0379602	-0.912119	0.591357	-0.454268	0.056888	1.59736	-0.506415
10	-0.0500406	-1.66685	-0.958761	-0.231565	0.676906	2.42293	1.42851	-0.499643	0.88455	-1.55474	0.102437	0.24749	-0.926924	-0.101812	-1.01261	0.464308	-0.565012	-0.0866461	1.45284	-0.588509
11	-0.0716613	-1.79858	-1.10115	-0.330276	0.648427	2.44186	1.44991	-0.577573	0.832659	-1.60696	0.0576762	0.255244	-1.08633	-0.158958	-1.10794	0.355985	-0.666588	-0.214013	1.3344	-0.665075
12	-0.0912571	-1.92662	-1.23447	-0.419752	0.627776	2.47794	1.48067	-0.651031	0.791065	-1.66351	0.0187271	0.264403	-1.23663	-0.21072	-1.19987	0.263545	-0.761043	-0.327993	1.23905	-0.737602
13	-0.109242	-2.05313	-1.36126	-0.501877	0.614239	2.53051	1.52063	-0.721435	0.758846	-1.72506	-0.015409	0.275005	-1.38078	-0.258273	-1.29001	0.184491	-0.850236	-0.431089	1.16414	-0.807446
14	-0.125988	-2.18009	-1.48383	-0.578349	0.607205	2.59914	1.56973	-0.790072	0.735178	-1.79229	-0.0456097	0.287101	-1.52142	-0.302664	-1.37984	0.116642	-0.935856	-0.525545	1.10735	-0.875845
15	-0.141834	-2.30934	-1.60432	-0.650704	0.60616	2.68354	1.62801	-0.85812	0.71933	-1.86588	-0.0726439	0.300757	-1.66096	-0.344825	-1.47074	0.0580994	-1.01944	-0.613376	1.06667	-0.943942
16	-0.157083	-2.44259	-1.72464	-0.720329	0.610683	2.78365	1.69561	-0.926662	0.710673	-1.94648	-0.0971857	0.316056	-1.8016	-0.385591	-1.56399	0.0072145	-1.10241	-0.696388	1.04039	-1.01279
17	-0.172014	-2.58145	-1.8466	-0.788485	0.620441	2.89955	1.77277	-0.99671	0.708669	-2.0348	-0.119826	0.333093	-1.94537	-0.425717	-1.66081	-0.0374407	-1.18605	-0.776206	1.02706	-1.08338
18	-0.186881	-2.72746	-1.97188	-0.856326	0.635184	3.03149	1.85984	-1.06921	0.712877	-2.13154	-0.141086	0.351984	-2.09417	-0.465889	-1.76237	-0.0771022	-1.27159	-0.854301	1.02549	-1.15665
19	-0.201918	-2.8821	-2.10204	-0.924917	0.654741	3.17988	1.95725	-1.14508	0.722944	-2.23744	-0.161425	0.37286	-2.2498	-0.506741	-1.86979	-0.11284	-1.36016	-0.932012	1.03471	-1.23349
20	-0.217345	-3.04679	-2.2386	-0.99525	0.679014	3.34526	2.06554	-1.2252	0.738603	-2.35329	-0.181253	0.395871	-2.41398	-0.548864	-1.98417	-0.145583	-1.45286	-1.01057	1.05397	-1.31477
21	-0.23337	-3.22294	-2.383	-1.06826	0.707974	3.52831	2.18533	-1.31043	0.759669	-2.47993	-0.200939	0.421188	-2.58838	-0.592819	-2.10662	-0.176139	-1.55075	-1.09112	1.0827	-1.40136
22	-0.250192	-3.41194	-2.53666	-1.14486	0.741661	3.72985	2.31737	-1.40165	0.786034	-2.61824	-0.220818	0.449002	-2.77468	-0.639149	-2.23825	-0.205214	-1.65487	-1.17475	1.12049	-1.49412
23	-0.268008	-3.61518	-2.70101	-1.22591	0.780176	3.9508	2.4625	-1.49973	0.817665	-2.76916	-0.2412	0.47953	-2.97452	-0.688384	-2.38017	-0.233434	-1.76625	-1.26249	1.16712	-1.59393
24	-0.287012	-3.83405	-2.87744	-1.31228	0.823686	4.19218	2.62164	-1.60559	0.854602	-2.93372	-0.262375	0.513012	-3.18956	-0.741057	-2.53357	-0.261352	-1.88595	-1.35535	1.2225	-1.70169
25	-0.3074	-4.06996	-3.06738	-1.40485	0.872415	4.45511	2.79584	-1.72017	0.89695	-3.113	-0.284622	0.549715	-3.4215	-0.797709	-2.69963	-0.289471	-2.01504	-1.45432	1.28668	-1.81835
26	-0.329372	-4.32431	-3.27228	-1.50451	0.926652	4.74074	2.98626	-1.84445	0.944888	-3.30816	-0.308212	0.589939	-3.67205	-0.858895	-2.87963	-0.31825	-2.15464	-1.5604	1.35983	-1.94487
27	-0.353139	-4.59851	-3.49364	-1.61216	0.986745	5.05031	3.19415	-1.9795	0.998656	-3.52042	-0.333412	0.634013	-3.94299	-0.925199	-3.07488	-0.348118	-2.3059	-1.67461	1.44226	-2.08233
28	-0.378921	-4.89397	-3.73299	-1.72877	1.05311	5.38501	3.42087	-2.12642	1.05856	-3.7511	-0.360494	0.682305	-4.2361	-0.997234	-3.28677	-0.37948	-2.47004	-1.798	1.53439	-2.23181
29	-0.40695	-5.21205	-3.99188	-1.85534	1.12621	5.74602	3.66787	-2.28642	1.12499	-4.00156	-0.389737	0.735221	-4.55322	-1.07565	-3.51676	-0.412733	-2.64837	-1.93166	1.63675	-2.3945
30	-0.437477	-5.55406	-4.27193	-1.99294	1.20661	6.13445	3.9367	-2.46076	1.19837	-4.27323	-0.421431	0.79321	-4.89616	-1.16117	-3.76636	-0.448267	-2.84224	-2.07675	1.74999	-2.57169
31	-0.470773	-5.92122	-4.57477	-2.14271	1.2949	6.5512	4.22902	-2.65083	1.27922	-4.5676	-0.455884	0.85677	-5.26674	-1.25453	-4.03717	-0.486474	-3.05311	-2.23449	1.87488	-2.76471
32	-0.50713	-6.31461	-4.90204	-2.30587	1.3918	6.99698	4.54651	-2.8581	1.36814	-4.88616	-0.49342	0.926449	-5.66673	-1.35656	-4.33083	-0.527758	-3.28251	-2.40616	2.01229	-2.97504
33	-0.546869	-6.73507	-5.25537	-2.48372	1.49805	7.47212	4.89093	-3.08415	1.46579	-5.23042	-0.534392	1.00286	-6.09775	-1.46816	-4.64904	-0.572539	-3.53208	-2.59317	2.16324	-3.20421
34	-0.590338	-7.18316	-5.63631	-2.67768	1.61453	7.97648	5.26404	-3.33067	1.57291	-5.60184	-0.57918	1.08666	-6.56125	-1.5903	-4.9935	-0.62126	-3.80354	-2.79698	2.32882	-3.4539
35	-0.637919	-7.65904	-6.04634	-2.88926	1.74217	8.50929	5.66755	-3.59947	1.69033	-6.0018	-0.628197	1.1786	-7.05838	-1.72406	-5.3659	-0.674392	-4.09868	-3.01917	2.51029	-3.72585
36	-0.690034	-8.16233	-6.48675	-3.12006	1.88202	9.069	6.1031	-3.89243	1.81898	-6.43152	-0.681894	1.27949	-7.58989	-1.8706	-5.76788	-0.732442	-4.41939	-3.26145	2.70901	-4.02193
37	-0.747145	-8.69197	-6.95856	-3.37183	2.03523	9.653	6.57213	-4.21157	1.95988	-6.89197	-0.740767	1.39024	-8.15592	-2.03118	-6.20095	-0.795958	-4.76757	-3.5256	2.92648	-4.34406
38	-0.809761	-9.24607	-7.46243	-3.6464	2.20307	10.2575	7.0758	-4.55896	2.11415	-7.38379	-0.805357	1.51182	-8.75584	-2.20721	-6.66643	-0.865539	-5.14518	-3.81352	3.16433	-4.69424
39	-0.878443	-9.82164	-7.99847	-3.94571	2.38691	10.8772	7.61485	-4.93673	2.28302	-7.90713	-0.876264	1.64535	-9.38802	-2.40019	-7.16532	-0.941834	-5.55413	-4.12722	3.42432	-5.07451
40	-2.52306	-2.23614	-5.46678	-4.41927	-4.30492	-4.53937	-3.00851	-3.04548	-5.50895	-1.17897	-4.22229	-3.29553	-2.67929	-2.49292	-5.15976	-5.12414	-0.80887	-3.01848	-3.60587	-2.29401
41	-3.00794	-3.06758	-5.92653	-5.43519	-4.85806	-5.27463	-3.90769	-4.07398	-6.22106	-2.08292	-5.03098	-3.95144	-3.36113	-3.59703	-5.64942	-5.78958	-1.83813	-3.653	-4.34381	-3.11044
42	-3.48047	-3.84703	-6.42697	-6.40335	-5.42483	-5.99961	-4.76002	-5.0277	-6.93356	-2.90672	-5.81942	-4.5862	-4.0028	-4.61361	-6.17162	-6.46334	-2.76602	-4.27199	-5.05715	-3.87178
43	-3.9502	-4.59491	-6.96966	-7.34203	-6.0125	-6.72562	-5.58581	-5.92773	-7.65437	-3.67429	-6.6018	-5.21224	-4.61798	-5.56737	-6.72959	-7.15328	-3.61923	-4.88841	-5.75978	-4.5967
44	-4.42533	-5.32813	-7.55582	-8.26512	-6.62712	-7.46157	-6.40157	-6.79111	-8.38915	-4.40561	-7.38936	-5.83987	-5.21818	-6.47844	-7.32594	-7.86542	-4.42011	-5.51314	-6.46301	-5.30072
45	-4.91297	-6.06062	-8.1861	-9.18237	-7.2736	-8.21405	-7.22047	-7.63115	-9.14134	-5.11729	-8.19056	-6.47755	-5.81295	-7.36275	-7.96255	-8.60387	-5.18726	-6.15526	-7.17586	-5.9966
46	-5.41926	-6.80365	-8.86034	-10.0995	-7.95561	-8.98731	-8.05257	-8.45771	-9.91197	-5.82304	-9.01111	-7.13206	-6.41016	-8.23235	-8.64029	-9.37071	-5.93597	-6.82225	-7.90519	-6.69472
47	-5.94949	-7.56609	-9.57718	-11.018	-8.67543	-9.7832	-8.90497	-9.27728	-10.6995	-6.53404	-9.85394	-7.8085	-7.01604	-9.09562	-9.35885	-10.1658	-6.67861	-7.52003	-8.65569	-7.40322
48	-6.50814	-8.35452	-10.3338	-11.9353	-9.43378	-10.6009	-9.78178	-10.0931	-11.4997	-7.2592	-10.719	-8.51031	-7.63532	-9.95734	-10.1163	-10.9864	-7.42491	-8.25296	-9.42985	-8.12811
49	-7.09885	-9.17316	-11.1251	-12.8441	-10.2294	-11.4368	-10.6839	-10.9049	-12.3049	-8.00526	-11.6027	-9.23915	-8.2712	-10.8186	-10.9086	-11.8268	-8.18209	-9.02364	-10.2277	-8.8733
50	-7.72438	-10.0237	-11.9439	-13.7325	-11.0588	-12.2836	-11.6085	-11.7093	-13.1041	-8.77679	-12.4981	-9.99464	-8.9253	-11.6769	-11.7295	-12.6781	-8.95492	-9.83274	-11.0467	-9.64045
51	-8.38642	-10.9049	-12.7796	-14.5834	-11.9155	-13.1306	-12.5489	-12.4991	-13.8827	-9.5761	-13.3936	-10.7741	-9.59752	-12.5255	-12.5695	-13.5271	-9.74564	-10.6785	-11.8811	-10.4288
52	-9.08541	-11.8122	-13.6181	-15.3751	-12.7898	-13.963	-13.4938	-13.2635	-14.6221	-10.403	-14.2731	-11.5724	-10.2859	-13.3536	-13.4154	-14.3569	-10.5538	-11.5565	-12.7218	-11.2349
53	-9.82028	-12.7373	-14.4412	-16.0811	-13.6678	-14.7614	-14.4267	-13.9878	-15.3	-11.2543	-15.1159	-12.381	-10.9864	-14.1464	-14.2504	-15.1457	-11.3759	-12.4588	-13.5558	-12.0522
54	-10.588	-13.6675	-15.2264	-16.6715	-14.5313	-15.5024	-15.3257	-14.6543	-15.891	-12.1238	-15.8959	-13.1883	-11.6925	-14.8845	-15.0529	-15.8678	-12.2054	-13.3734	-14.3658	-12.8707
55	-11.3834	-14.5848	-15.947	-17.1145	-15.3574	-16.1585	-16.1633	-15.2417	-16.3676	-13.0012	-16.5829	-13.9789	-12.3953	-15.545	-15.7973	-16.4935	-13.0318	-14.2839	-15.1306	-13.6767
56	-12.1983	-15.4663	-16.5727	-17.3785	-16.1184	-16.6995	-16.9068	-15.727	-16.7017	-13.8724	-17.1434	-14.7332	-13.0831	-16.1019	-16.4537	-16.9908	-13.8408	-15.1686	-15.8247	-14.4526
57	-13.0214	-16.2832	-17.0706	-17.4356	-16.7823	-17.0936	-17.5194	-16.086	-16.8669	-14.7183	-17.5423	-15.428	-13.7414	-16.5275	-16.9897	-17.327	-14.6141	-16.0007	-16.4192	-15.1767
58	-13.8376	-17.0021	-17.4073	-17.2642	-17.3143	-17.3105	-17.9623	-16.2954	-16.8407	-15.5152	-17.7463	-16.0369	-14.3527	-16.7945	-17.3716	-17.4717	-15.3293	-16.7483	-16.8832	-15.8235
59	-14.628	-17.5858	-17.5516	-16.853	-17.6787	-17.3234	-18.1976	-16.3349	-16.6076	-16.235	-17.7262	-16.5308	-14.8973	-16.8782	-17.567	-17.3996	-15.9604	-17.3753	-17.1856	-16.3652
60	-15.3693	-17.9955	-17.4777	-16.2027	-17.8416	-17.1129	-18.1924	-16.1894	-16.1612	-16.8459	-17.4618	-16.8802	-15.3538	-16.7591	-17.5482	-17.0941	-16.4787	-17.8435	-17.2979	-16.772
61	-16.0346	-18.194	-17.1683	-15.3277	-17.7748	-16.6694	-17.9229	-15.8509	-15.5059	-17.3136	-16.9443	-17.057	-15.7	-16.426	-17.2956	-16.5498	-16.8548	-18.1149	-17.1972	-17.0152
62	-16.5939	-18.1495	-16.6178	-14.2552	-17.4593	-15.9957	-17.3782	-15.3203	-14.6575	-17.6043	-16.1791	-17.0373	-15.9143	-15.8778	-16.8004	-15.7746	-17.06	-18.1558	-16.8689	-17.069
63	-17.0155	-17.8399	-15.8341	-13.0227	-16.8885	-15.1074	-16.5636	-14.6081	-13.6417	-17.687	-15.1861	-16.8041	-15.9776	-15.1245	-16.0673	-14.7896	-17.0697	-17.9405	-16.3097	-16.9138
64	-17.2686	-17.2567	-14.8385	-11.6742	-16.0704	-14.0322	-15.5009	-13.7339	-12.4925	-17.5375	-13.9987	-16.3502	-15.8752	-14.1873	-15.1144	-13.6276	-16.8658	-17.4554	-15.5288	-16.5385
65	-17.3253	-16.4075	-13.6642	-10.2564	-15.0279	-12.8073	-14.2272	-12.725	-11.2483	-17.1417	-12.6599	-15.6798	-15.5983	-13.0968	-13.9729	-12.3298	-16.4397	-16.7023	-14.5481	-15.9434
66	-17.1642	-15.3161	-12.3531	-8.81353	-13.7969	-11.4757	-12.7908	-11.6139	-9.94905	-16.4981	-11.2186	-14.8088	-15.1458	-11.8898	-12.6831	-10.9418	-15.7942	-15.6992	-13.4001	-15.1401
67	-16.7736	-14.0214	-10.9513	-7.38509	-12.4224	-10.0822	-11.2461	-10.4356	-8.63254	-15.6197	-9.72389	-13.7642	-14.5246	-10.6067	-11.2911	-9.50906	-14.9437	-14.4796	-12.1251	-14.1521
68	-16.1529	-12.5724	-9.50509	-6.00318	-10.9542	-8.66926	-9.64776	-9.22459	-7.33205	-14.5332	-8.22139	-12.5812	-13.7501	-9.28699	-9.84386	-8.07341	-13.9144	-13.0889	-10.7668	-13.0122
69	-15.3149	-11.0235	-8.05663	-4.69196	-9.4418	-7.27408	-8.04578	-8.01257	-6.07482	-13.2769	-6.74993	-11.3003	-12.8448	-7.96696	-8.38509	-6.67027	-12.7409	-11.5796	-9.36879	-11.7594
70	-14.2843	-9.42847	-6.64173	-3.4678	-7.93013	-5.92696	-6.48227	-6.82664	-4.88143	-11.8964	-5.34004	-9.96301	-11.8363	-6.67739	-6.95256	-5.32737	-11.4635	-10.0058	-7.97074	-10.4356
71	-13.096	-7.83615	-5.28832	-2.34019	-6.45691	-4.65051	-4.98968	-5.6884	-3.76599	-10.4402	-4.01354	-8.60892	-10.7553	-5.4425	-5.57627	-4.06452	-10.1244	-8.41787	-6.60618	-9.08139
72	-11.7917	-6.28708	-4.01628	-1.31293	-5.05119	-3.45993	-3.59064	-4.61376	-2.73679	-8.95507	-2.78425	-7.27259	-9.63315	-4.27976	-4.27806	-2.89422	-8.76373	-6.85923	-5.30129	-7.73345
73	-10.4157	-4.81215	-2.83807	-0.385422	-3.7333	-2.3639	-2.29891	-3.61323	-1.79728	-7.48264	-1.65914	-5.98218	-8.49919	-3.20037	-3.07208	-1.82273	-7.41711	-5.36399	-4.07473	-6.42241
74	-9.01088	-3.43258	-1.75987	0.4461	-2.51563	-1.36572	-1.12082	-2.6926	-0.947129	-6.05695	-0.639757	-4.75884	-7.37951	-2.21013	-1.96583	-0.85135	-6.11377	-3.9566	-2.93824	-5.17191
75	-7.61555	-2.16096	-0.782845	1.18756	-1.40393	-0.464551	-0.057034	-1.85374	-0.183176	-4.70364	0.276367	-3.61686	-6.29566	-1.3105	-0.9615	0.0223418	-4.87581	-2.65253	-1.89764	-3.99863
76	-6.2615	-1.00276	0.0955645	1.84621	-0.398781	0.343453	0.895946	-1.09549	0.499702	-3.44008	1.0945	-2.56451	-5.26424	-0.499572	-0.0572248	0.803356	-3.7184	-1.45965	-0.954057	-2.91287
77	-4.97296	0.041995	0.880509	2.42998	0.503039	1.06417	1.74436	-0.414463	1.10788	-2.27634	1.82168	-1.60504	-4.29693	0.226933	0.751695	1.49839	-2.65051	-0.379789	-0.105079	-1.91951
78	-3.76673	0.977211	1.57881	2.94701	1.30732	1.70472	2.49612	0.19431	1.64842	-1.2165	2.46595	-0.737825	-3.40101	0.874891	1.47183	2.1151	-1.67593	0.589618	0.654183	-1.01915
79	-2.65288	1.80937	2.19823	3.40535	2.02147	2.27288	3.15998	0.736772	2.12868	-0.25999	3.03577	0.0406551	-2.57989	1.45114	2.11082	2.66155	-0.794384	1.45418	1.33024	-0.209166
80	-2.26376	1.70787	0.829674	0.331791	-3.49371	-0.427512	-1.40785	0.871468	-0.017295	-0.509694	-0.645127	-0.364669	-1.66286	-1.43915	1.93625	-0.412932	1.18969	1.57722	1.59034	1.20974
81	-1.26773	2.31569	1.45736	0.922901	-2.72506	0.283071	-0.485549	1.22696	0.907445	0.202142	0.215411	0.33589	-0.701916	-0.414415	2.49822	0.33374	2.26421	2.30488	2.12227	1.78924
82	-0.370847	2.85272	2.01327	1.44824	-2.03084	0.917171	0.339874	1.54136	1.73049	0.837512	0.981961	0.960009	0.155507	0.498901	2.99614	0.999236	3.217	2.95092	2.59597	2.30429
83	0.431929	3.32685	2.50432	1.91442	-1.40767	1.48065	1.07563	1.81927	2.46223	1.40244	1.66414	1.51517	0.918911	1.31177	3.43793	1.59102	4.05974	3.52498	3.01922	2.76279
84	1.14739	3.74579	2.93763	2.32818	-0.85088	1.98004	1.72994	2.06531	3.11313	1.90356	2.27174	2.00908	1.5984	2.03558	3.83113	2.11694	4.804	4.0363	3.3994	3.17236
85	1.78335	4.11687	3.3202	2.69617	-0.355009	2.42217	2.31144	2.28399	3.69336	2.3478	2.81432	2.44938	2.20411	2.68158	4.1828	2.58485	5.46067	4.49346	3.74333	3.54019
86	2.34807	4.44695	3.6588	3.02478	0.0858451	2.81388	2.82877	2.47961	4.21244	2.74205	3.301	2.84342	2.74589	3.26049	4.49943	3.00238	6.03976	4.90435	4.05728	3.87294
87	2.84987	4.74233	3.95981	3.32005	0.477747	3.16179	3.29027	2.65622	4.67916	3.09298	3.74022	3.19814	3.23299	3.78228	4.78695	3.37676	6.55017	5.27607	4.34694	4.17671
88	3.2968	5.00876	4.22914	3.58759	0.82671	3.47224	3.70386	2.81761	5.10144	3.40694	4.13972	3.52	3.674	4.25605	5.05069	3.71473	6.99971	5.61493	4.61742	4.45704
89	3.69654	5.25142	4.47226	3.83258	1.13856	3.75114	4.07685	2.96726	5.48636	3.68985	4.50652	3.81492	4.07673	4.68996	5.29539	4.02251	7.39512	5.92649	4.87328	4.71889
90	4.0562	5.47492	4.69411	4.0597	1.41882	4.00395	4.41594	3.10836	5.84012	3.94717	4.84685	4.08828	4.44821	5.09125	5.52526	4.30574	7.74215	6.21559	5.11855	4.96667
91	4.38233	5.68335	4.89915	4.27323	1.67267	4.23565	4.72718	3.24384	6.16813	4.18389	5.16625	4.34491	4.7947	5.46628	5.74399	4.5695	8.04564	6.48639	5.35676	5.2043
92	4.68084	5.88029	5.09137	4.47699	1.90493	4.45078	5.01598	3.37633	6.475	4.40452	5.46955	4.58917	5.12174	5.82054	5.95478	4.81833	8.30962	6.74241	5.59099	5.43519
93	4.95705	6.06887	5.2743	4.67437	2.12	4.65339	5.28713	3.50825	6.76463	4.61312	5.76093	4.82489	5.43414	6.15869	6.16038	5.05627	8.53744	6.98658	5.8239	5.66233
94	5.2157	6.25177	5.45108	4.86843	2.32194	4.84713	5.54485	3.64176	7.04026	4.8133	6.044	5.0555	5.73606	6.48468	6.36313	5.28685	8.7319	7.2213	6.05774	5.88827
95	5.46096	6.4313	5.62443	5.06184	2.51442	5.0352	5.7928	3.77884	7.30449	5.00829	6.32175	5.28396	6.03106	6.80173	6.56497	5.51319	8.89529	7.44845	6.29439	6.11518
96	5.69646	6.60937	5.79673	5.25696	2.7008	5.22046	6.03412	3.9213	7.55935	5.2009	6.5967	5.51288	6.32212	7.11239	6.76749	5.73796	9.02955	7.66947	6.53538	6.34487
97	5.92535	6.78755	5.97001	5.45583	2.88412	5.40539	6.27149	4.07078	7.80634	5.39362	6.87082	5.74449	6.61167	7.4186	6.97195	5.96345	9.13633	7.88538	6.78189	6.5788
98	6.15033	6.96711	6.14601	5.66025	3.06716	5.59216	6.50713	4.22878	8.0465	5.5886	7.14564	5.9807	6.90163	7.72171	7.17926	6.19158	9.21708	8.09676	7.03478	6.8181
99	6.37366	7.14902	6.32618	5.87173	3.25246	5.78265	6.74284	4.39669	8.28036	5.7877	7.42221	6.22308	7.19346	8.0225	7.39003	6.42396	9.27313	8.30388	7.29458	7.06357
100	6.59722	7.33395	6.51169	6.09154	3.44234	5.97843	6.98004	4.5758	8.50807	5.9925	7.70117	6.47291	7.48812	8.3212	7.6046	6.66182	9.30575	8.50664	7.56149	7.31572
101	6.82249	7.5223	6.70347	6.32072	3.63896	6.18084	7.21977	4.76731	8.72939	6.2043	7.98269	6.73114	7.7861	8.61753	7.82299	6.90612	9.31619	8.70462	7.83537	7.57469
102	7.05061	7.71424	6.90219	6.56005	3.84431	6.39095	7.46271	4.97231	8.9437	6.42416	8.26654	6.99846	8.08743	8.91067	8.04494	7.15748	9.30574	8.89713	8.11571	7.84034
103	7.28238	7.90965	7.1083	6.81011	4.06025	6.60959	7.70916	5.19181	9.15008	6.65289	8.55203	7.27522	8.3917	9.19932	8.2699	7.41621	9.27575	9.0832	8.40167	8.11218
104	7.51826	8.10819	7.32199	7.0712	4.28853	6.83737	7.95911	5.42677	9.34731	6.89105	8.83805	7.56145	8.698	9.48171	8.49704	7.68231	9.22766	9.26164	8.69201	8.38935
105	7.7584	8.30926	7.54323	7.34336	4.53077	7.07463	8.21217	5.67799	9.53391	7.13894	9.12307	7.85685	9.00494	9.75559	8.72524	7.95544	9.16301	9.43106	8.98507	8.67064
106	8.0026	8.51202	7.77173	7.62635	4.78854	7.32147	8.46762	5.94622	9.70821	7.3966	9.40512	8.16076	9.31066	10.0183	8.95309	8.23491	9.08342	9.58989	9.2788	8.95446
107	8.25035	8.71538	8.00693	7.91963	5.06327	7.57773	8.72439	6.23205	9.86837	7.66381	9.68179	8.4721	9.61281	10.2669	9.17891	8.51968	8.99062	9.73645	9.57073	9.23882
108	8.50082	8.91803	8.24802	8.2223	5.3563	7.84298	8.98104	6.5359	10.0125	7.94003	9.95029	8.78941	9.90856	10.4979	9.40075	8.80833	8.88641	9.86898	9.85795	9.52135
109	8.75282	9.11842	8.49392	8.53311	5.66885	8.11646	9.23579	6.85801	10.1385	8.22439	10.2075	9.11075	10.1946	10.7079	9.6164	9.09903	8.77264	9.98567	10.1371	9.79926
110	9.00486	9.31481	8.74322	8.85038	6.00201	8.39712	9.48653	7.19839	10.2445	8.51571	10.4498	9.43372	10.4674	10.8931	9.82341	9.38955	8.65122	10.0848	10.4046	10.0694
111	9.25508	9.50521	8.99426	9.17202	6.35666	8.68354	9.73081	7.55672	10.3287	8.81242	10.6735	9.75541	10.7226	11.0498	10.0191	9.67725	8.52405	10.1646	10.6563	10.3282
112	9.50133	9.6875	9.24501	9.49545	6.73348	8.97397	9.96587	7.93235	10.3893	9.11253	10.8747	10.0724	10.9561	11.1744	10.2008	9.95907	8.39303	10.2236	10.888	10.5719
113	9.74112	9.8594	9.49318	9.8176	7.13285	9.26621	10.1887	8.32419	10.425	9.41367	11.0494	10.3809	11.1633	11.2635	10.3655	10.2316	8.26	10.2605	11.0951	10.7963
114	9.97168	10.0185	9.73616	10.1349	7.55478	9.55771	10.3961	8.73063	10.4345	9.71302	11.1936	10.6763	11.3397	11.3144	10.5103	10.4909	8.12674	10.2742	11.2732	10.9973
115	10.19	10.1624	9.97105	10.4433	7.99885	9.84549	10.5845	9.14947	10.4173	10.0073	11.3036	10.9541	11.4807	11.3247	10.6325	10.733	7.99497	10.264	11.4178	11.1705
116	10.3928	10.2886	10.1947	10.7383	8.46407	10.1261	10.7507	9.57783	10.3728	10.2929	11.3761	11.2089	11.5824	11.2927	10.7291	10.9535	7.86628	10.2296	11.5247	11.3117
117	10.5769	10.3947	10.4037	11.0149	8.94875	10.3959	10.8911	10.012	10.3013	10.5657	11.4081	11.4355	11.6409	11.2177	10.7979	11.148	7.74214	10.1709	11.5904	11.4171
118	10.7386	10.4785	10.5946	11.2679	9.45039	10.6507	11.0026	10.4476	10.2035	10.8213	11.3975	11.6285	11.6534	11.0998	10.8366	11.312	7.62391	10.0884	11.6116	11.4832
119	10.8748	10.5381	10.7639	11.4919	9.96555	10.8862	11.0819	10.879	10.0805	11.055	11.343	11.7827	11.6178	10.9402	10.8435	11.4411	7.5128	9.98298	11.5862	11.5069
120	9.61698	10.5819	8.84808	10.4072	8.50588	12.3221	11.8397	9.2981	11.3826	9.56164	9.12206	9.84941	10.8019	10.6139	9.79488	12.75	10.7051	13.3972	12.4474	10.2315
121	9.61957	10.5963	9.06222	10.3642	8.32537	12.1669	11.3841	8.90568	11.3261	9.35285	8.79561	9.80237	10.6669	10.6596	9.94401	12.508	10.6428	13.1493	12.1105	10.1297
122	9.60774	10.6111	9.2285	10.2906	8.12179	11.9838	10.9129	8.5117	11.2145	9.11101	8.46683	9.70402	10.4938	10.698	10.0458	12.2679	10.5633	12.9004	11.7744	10.0012
123	9.58144	10.6219	9.34997	10.1875	7.90095	11.7701	10.4304	8.12132	11.0499	8.84248	8.13996	9.55976	10.2856	10.725	10.1019	12.023	10.4655	12.6421	11.4361	9.84809
124	9.54086	10.6247	9.42948	10.0565	7.66835	11.525	9.94176	7.73929	10.8356	8.55362	7.81894	9.37532	10.046	10.7371	10.1143	11.7687	10.349	12.3683	11.0938	9.67273
125	9.48635	10.6162	9.46975	9.89972	7.42908	11.2488	9.45225	7.36981	10.5761	8.25062	7.50734	9.15663	9.77926	10.7315	10.0851	11.5017	10.2137	12.075	10.7473	9.47798
126	9.4185	10.5935	9.47351	9.71978	7.18782	10.9433	8.96735	7.0165	10.2765	7.93936	7.20831	8.90979	9.49013	10.7057	10.0167	11.2206	10.0602	11.7602	10.3971	9.26694
127	9.33809	10.5543	9.44353	9.51957	6.94874	10.6116	8.49229	6.68238	9.94289	7.62535	6.92452	8.64088	9.18357	10.658	9.91187	10.9248	9.88976	11.4235	10.0447	9.04287
128	9.24608	10.4969	9.3827	9.30229	6.71551	10.2574	8.03188	6.36985	9.58176	7.31358	6.65821	8.3559	8.86466	10.5871	9.77385	10.6153	9.70393	11.066	9.6921	8.80917
129	9.14362	10.4203	9.29401	9.07138	6.4913	9.88535	7.59035	6.08072	9.19995	7.00849	6.41113	8.0606	8.53846	10.4925	9.60616	10.2936	9.50467	10.6902	9.34167	8.56924
130	9.03198	10.3238	9.18059	8.83034	6.2788	9.50043	7.17128	5.81629	8.80435	6.71394	6.18466	7.7604	8.20982	10.3742	9.41264	9.96221	9.29427	10.2993	8.99605	8.32642
131	8.91258	10.2074	9.04569	8.58274	6.0802	9.10789	6.77756	5.57738	8.40168	6.43317	5.97977	7.46029	7.88332	10.2329	9.19736	9.62401	9.07522	9.89755	8.65791	8.08391
132	8.78691	10.0718	8.89262	8.33205	5.89727	8.71296	6.41136	5.36439	7.99827	6.16886	5.79709	7.16476	7.56313	10.0698	8.96455	9.2823	8.85016	9.48932	8.32989	7.84473
133	8.65654	9.91786	8.72474	8.08161	5.73137	8.32068	6.07425	5.17741	7.59993	5.9231	5.63698	6.87774	7.25297	9.88661	8.71848	8.9405	8.6218	9.07937	8.01444	7.61165
134	8.52307	9.74711	8.54541	7.83456	5.58354	7.93577	5.76717	5.01623	7.2118	5.69749	5.49955	6.60262	6.95606	9.68561	8.46342	8.60207	8.3928	8.67237	7.71379	7.38715
135	8.38809	9.56142	8.35792	7.59377	5.45449	7.56243	5.49055	4.88046	6.83832	5.49319	5.38472	6.34221	6.6751	9.46932	8.20345	8.27035	8.16578	8.27278	7.42989	7.17342
136	8.25318	9.36298	8.16545	7.36181	5.34468	7.20438	5.24439	4.76956	6.48317	5.31093	5.29227	6.09879	6.4123	9.24059	7.94249	7.94846	7.94319	7.88471	7.1644	6.97235
137	8.11987	9.15422	7.97103	7.14096	5.25436	6.86472	5.02836	4.68287	6.1493	5.15112	5.22186	5.87416	6.16939	9.00247	7.68414	7.63922	7.72732	7.51182	6.91863	6.78554
138	7.9896	8.93774	7.7775	6.93316	5.18363	6.54596	4.84181	4.61971	5.83896	5.01391	5.17309	5.66962	5.94764	8.75808	7.43171	7.34512	7.52023	7.15723	6.69363	6.61426
139	7.86375	8.71623	7.58748	6.74002	5.13245	6.25007	4.68394	4.57936	5.55374	4.89922	5.14553	5.48611	5.74795	8.51057	7.18811	7.06826	7.32378	6.82355	6.49012	6.45955
140	7.74358	8.4924	7.40332	6.56289	5.1007	5.97847	4.55379	4.56115	5.29467	4.80683	5.13872	5.32421	5.57086	8.26302	6.95589	6.81036	7.13956	6.51279	6.30861	6.32219
141	7.63024	8.26889	7.22715	6.40278	5.08819	5.7321	4.45034	4.5644	5.06229	4.73637	5.15222	5.18423	5.41665	8.01835	6.7372	6.57279	6.96893	6.22648	6.14933	6.20273
142	7.52476	8.04824	7.06079	6.26049	5.0947	5.51148	4.37254	4.58854	4.85674	4.68744	5.1856	5.06621	5.28533	7.77928	6.53383	6.35654	6.813	5.96565	6.01234	6.10156
143	7.42805	7.83283	6.90584	6.13657	5.12	5.31681	4.31938	4.63305	4.67783	4.65957	5.23847	4.97006	5.17677	7.54831	6.34721	6.16231	6.67268	5.73094	5.89755	6.01888
144	7.34091	7.62485	6.76362	6.03138	5.16386	5.14797	4.28986	4.69748	4.52512	4.65232	5.31049	4.89553	5.09066	7.32764	6.17845	5.99051	6.54866	5.52258	5.80474	5.95477
145	7.26401	7.42626	6.63522	5.94511	5.22607	5.00463	4.2831	4.78148	4.39799	4.66522	5.40135	4.8423	5.02662	7.11921	6.02837	5.84133	6.44146	5.34053	5.73358	5.90922
146	7.1979	7.2388	6.52151	5.87783	5.30642	4.88631	4.29827	4.88478	4.2957	4.69788	5.51079	4.80996	4.98422	6.92466	5.89751	5.71475	6.35142	5.18451	5.68369	5.88211
147	7.14305	7.06394	6.42318	5.82948	5.40475	4.7924	4.33468	5.0072	4.21746	4.74993	5.63859	4.79812	4.96299	6.74533	5.78624	5.6106	6.27875	5.05406	5.65465	5.87327
148	7.09979	6.90295	6.34072	5.79994	5.52092	4.72223	4.39174	5.14862	4.16244	4.82107	5.78454	4.80637	4.96246	6.58232	5.69471	5.5286	6.22355	4.94859	5.646	5.8825
149	7.06839	6.75684	6.27448	5.78903	5.65481	4.67511	4.46897	5.30899	4.12984	4.91107	5.94847	4.83433	4.98218	6.43648	5.62295	5.46837	6.18582	4.86743	5.6573	5.90955
150	7.04902	6.62642	6.22469	5.79651	5.8063	4.65036	4.56602	5.4883	4.11891	5.01975	6.1302	4.88164	5.02173	6.30841	5.57087	5.42949	6.16547	4.80987	5.68811	5.95417
151	7.04178	6.51232	6.19145	5.82212	5.9753	4.6473	4.68263	5.68657	4.12894	5.14699	6.32954	4.94802	5.08074	6.19855	5.53831	5.41152	6.16237	4.77519	5.738	6.01608
152	7.04669	6.41498	6.17479	5.8656	6.16167	4.66535	4.81868	5.90385	4.15935	5.29273	6.54624	5.0332	5.15889	6.10714	5.52503	5.41399	6.17633	4.76271	5.80657	6.095
153	7.0637	6.33469	6.17466	5.92667	6.36528	4.70395	4.9741	6.14016	4.20962	5.45695	6.78	5.13699	5.25592	6.03432	5.53078	5.43646	6.20712	4.77178	5.89343	6.19065
154	7.09272	6.27162	6.19095	6.00504	6.58591	4.76264	5.14894	6.39546	4.27936	5.63966	7.0304	5.25924	5.37159	5.98007	5.55528	5.4785	6.25449	4.80181	5.99824	6.30272
155	7.13357	6.22584	6.22352	6.10043	6.82328	4.84105	5.34327	6.66964	4.36825	5.84088	7.2969	5.39986	5.50574	5.94432	5.59824	5.53972	6.31817	4.85228	6.12063	6.43089
156	7.18604	6.19731	6.27217	6.21256	7.07699	4.93885	5.55723	6.96247	4.47611	6.06063	7.57876	5.55879	5.65823	5.92691	5.65939	5.61975	6.39786	4.92276	6.26027	6.57483
157	7.24984	6.18594	6.33668	6.3411	7.34648	5.05584	5.79098	7.27353	4.60284	6.29887	7.87504	5.73598	5.82894	5.92764	5.73845	5.71826	6.49323	5.01287	6.41681	6.73415
158	7.32466	6.19157	6.41679	6.48576	7.631	5.19185	6.04464	7.60218	4.74845	6.55552	8.18451	5.93139	6.01776	5.94626	5.83518	5.83494	6.60394	5.12233	6.58987	6.90841
159	7.41009	6.214	6.51223	6.64616	7.92958	5.34679	6.31832	7.9475	4.91302	6.83037	8.50561	6.14499	6.22457	5.98252	5.94931	5.96952	6.72961	5.25093	6.77903	7.09711
160	3.59898	3.75753	5.08255	2.97921	7.70994	5.69535	6.95257	4.55134	4.46822	2.26825	2.79671	5.09994	5.84813	4.53232	6.90554	7.52832	7.16307	4.67881	6.67044	5.31991
161	3.99999	4.12021	5.25982	3.24917	7.74891	5.92965	7.16738	4.85745	4.73858	2.81807	3.10889	5.43902	6.08458	4.80265	7.16317	7.50525	7.17762	5.01751	6.64569	5.75849
162	4.38334	4.46595	5.46457	3.51222	7.84061	6.18699	7.39291	5.15784	5.0062	3.32109	3.40993	5.7605	6.3332	5.07512	7.41764	7.51635	7.24375	5.35075	6.66022	6.18024
163	4.75494	4.79999	5.69607	3.77231	7.97876	6.46705	7.62872	5.45605	5.27413	3.78686	3.70471	6.06864	6.5946	5.35237	7.67	7.55821	7.35587	5.68225	6.71053	6.58987
164	5.11987	5.12689	5.95378	4.03296	8.15775	6.76945	7.87415	5.7551	5.54503	4.22379	3.99751	6.367	6.86916	5.6367	7.92087	7.62775	7.50912	6.01513	6.79357	6.99113
165	5.48252	5.45057	6.23724	4.29735	8.37255	7.09373	8.12828	6.05751	5.82117	4.63923	4.29218	6.65857	7.15701	5.93005	8.17045	7.72217	7.6992	6.35196	6.90662	7.38689
166	5.84661	5.7744	6.54603	4.56832	8.61845	7.43923	8.38995	6.36539	6.10444	5.03956	4.59212	6.94573	7.45801	6.234	8.41854	7.83889	7.92221	6.69481	7.04726	7.77918
167	6.2152	6.10119	6.87972	4.8484	8.89098	7.80506	8.65768	6.68038	6.39639	5.43026	4.90034	7.23031	7.7717	6.54984	8.66455	7.97549	8.17452	7.04518	7.2133	8.16917
168	6.59079	6.43324	7.23773	5.13986	9.18569	8.18997	8.92967	7.00369	6.69822	5.81596	5.21952	7.51363	8.09728	6.87848	8.90752	8.12967	8.45263	7.40409	7.40269	8.55724
169	6.97525	6.77235	7.61929	5.4447	9.49807	8.5923	9.20381	7.3361	7.01074	6.20053	5.55197	7.79653	8.43356	7.22047	9.14612	8.29915	8.75307	7.77201	7.61347	8.94298
170	7.3699	7.11982	8.02333	5.76465	9.8234	9.00987	9.4776	7.67791	7.33442	6.5871	5.89972	8.07934	8.77891	7.57596	9.3787	8.48168	9.07224	8.14882	7.84371	9.32515
171	7.77542	7.47646	8.44834	6.1012	10.1567	9.43983	9.74823	8.02898	7.66932	6.9781	6.26442	8.36193	9.13122	7.94466	9.6033	8.67497	9.4063	8.53386	8.09144	9.70177
172	8.19184	7.84254	8.89231	6.45554	10.4924	9.87864	10.0125	8.38863	8.01507	7.37527	6.6474	8.64373	9.48783	8.32579	9.81767	8.87666	9.75111	8.92578	8.35457	10.0701
173	8.61851	8.2178	9.35255	6.82854	10.8249	10.3219	10.2669	8.75564	8.37084	7.77967	7.04958	8.92369	9.84551	8.71801	10.0193	9.08427	10.1021	9.32259	8.63086	10.4265
174	9.05402	8.60137	9.82559	7.22073	11.1477	10.7644	10.5077	9.1282	8.73528	8.19162	7.47145	9.20034	10.2004	9.1194	10.2056	9.29519	10.4542	9.72155	8.91784	10.7668
175	9.49614	8.99178	10.307	7.63219	11.4543	11.1997	10.7307	9.50388	9.1065	8.61076	7.91298	9.47178	10.5482	9.52732	10.3738	9.50667	10.8019	10.1192	9.21276	11.0862
176	9.94179	9.38687	10.7914	8.06254	11.7373	11.6207	10.9318	9.87959	9.48198	9.03589	8.37354	9.73569	10.8836	9.93844	10.5209	9.71579	11.139	10.5112	9.51254	11.3793
177	10.3869	9.78376	11.2722	8.51079	11.9896	12.0193	11.1068	10.2515	9.85858	9.46504	8.85179	9.98939	11.2013	10.3486	10.6443	9.91948	11.4589	10.8925	9.81373	11.6403
178	10.8264	10.1788	11.7417	8.97527	12.2038	12.3864	11.2515	10.6153	10.2325	9.89535	9.34556	10.2298	11.495	10.7528	10.7413	10.1145	11.7545	11.2573	10.1125	11.8632
179	11.2544	10.5676	12.191	9.45352	12.3727	12.7124	11.3619	10.9656	10.5991	10.323	9.85175	10.4538	11.7583	11.1453	10.8096	10.2976	12.0185	11.599	10.4046	12.0422
180	11.6637	10.945	12.61	9.94215	12.4896	12.9875	11.4345	11.2967	10.9533	10.7434	10.3661	10.6576	11.9847	11.5194	10.8469	10.4653	12.2434	11.9106	10.6855	12.1715
181	12.0465	11.305	12.9878	10.4367	12.5485	13.2017	11.4662	11.6023	11.2893	11.1509	10.8833	10.8378	12.1676	11.8678	10.8518	10.6143	12.4218	12.1846	10.9501	12.2463
182	12.394	11.641	13.3129	10.9317	12.5448	13.3457	11.4548	11.8757	11.6005	11.5389	11.3966	10.9906	12.3008	12.1827	10.8231	10.7413	12.5469	12.4134	11.1933	12.2623
183	12.6972	11.9459	13.5735	11.4203	12.475	13.4114	11.3989	12.11	11.8802	11.9001	11.8979	11.1126	12.3788	12.4557	10.7605	10.8431	12.6126	12.5896	11.4097	12.2166
184	12.9466	12.2122	13.7583	11.8945	12.3376	13.3921	11.2978	12.2982	12.1214	12.2266	12.3776	11.2006	12.3969	12.6786	10.6641	10.9168	12.6138	12.7061	11.5938	12.1078
185	13.1331	12.4323	13.8571	12.3449	12.1328	13.2835	11.1522	12.4339	12.317	12.5099	12.8251	11.2517	12.3518	12.8432	10.5347	10.96	12.5472	12.757	11.7406	11.9359
186	13.2481	12.5989	13.8613	12.7613	11.8631	13.0839	10.9637	12.5113	12.4604	12.7416	13.2284	11.2635	12.2416	12.9423	10.3741	10.9706	12.4109	12.7376	11.845	11.7029
187	13.2846	12.7052	13.7647	13.1322	11.5325	12.7946	10.7349	12.5255	12.5454	12.9134	13.5749	11.2346	12.0661	12.9696	10.1845	10.9471	12.2052	12.6448	11.9028	11.4122
188	13.237	12.7454	13.5644	13.446	11.1471	12.4197	10.4695	12.473	12.567	13.0176	13.8518	11.1641	11.8272	12.9206	9.96868	10.8887	11.9325	12.4777	11.9105	11.069
189	13.102	12.7151	13.261	13.6907	10.7145	11.9666	10.1719	12.3521	12.5215	13.048	14.0466	11.0521	11.5284	12.7925	9.73001	10.7953	11.5969	12.2373	11.8656	10.6798
190	12.8792	12.6114	12.8587	13.8549	10.2432	11.4449	9.84722	12.1628	12.4068	12.9996	14.1478	10.8996	11.1748	12.5851	9.47223	10.6677	11.2048	11.9269	11.7669	10.2523
191	12.5707	12.4338	12.3654	13.9287	9.74274	10.8666	9.50105	11.9071	12.2227	12.8699	14.1461	10.7085	10.7733	12.3003	9.19937	10.5071	10.7638	11.5522	11.6143	9.79491
192	12.1816	12.1835	11.7922	13.9039	9.22266	10.2447	9.1392	11.5889	11.971	12.6583	14.0348	10.4817	10.3318	11.9429	8.91559	10.3157	10.2829	11.1204	11.4094	9.31621
193	11.7198	11.8644	11.1527	13.7752	8.69248	9.59283	8.76753	11.2142	11.6556	12.3672	13.8109	10.2228	9.85901	11.5196	8.62509	10.0964	9.77185	10.6405	11.155	8.82498
194	11.1952	11.4822	10.4625	13.5406	8.16115	8.9247	8.39176	10.7901	11.2822	12.0011	13.4753	9.93612	9.36406	11.0392	8.33195	9.85239	9.24054	10.1226	10.8552	8.32955
195	10.6196	11.0444	9.73756	13.2017	7.63682	8.2531	8.01729	10.3254	10.858	11.5674	13.033	9.62646	8.85606	10.512	8.04007	9.58762	8.69879	9.57728	10.5154	7.83768
196	10.0059	10.5602	8.99394	12.7641	7.12664	7.58963	7.64907	9.82931	10.3917	11.075	12.4934	9.29897	8.34374	9.94938	7.75308	9.30622	8.15587	9.01517	10.1417	7.35625
197	9.36723	10.0397	8.2467	12.2369	6.63661	6.94426	7.2915	9.31156	9.8927	10.5347	11.869	8.95897	7.8352	9.36283	7.47424	9.01253	7.62017	8.44657	9.74093	6.89122
198	8.71637	9.49335	7.50932	11.6324	6.17157	6.32523	6.9484	8.78177	9.37088	9.9583	11.1756	8.61173	7.33762	8.76383	7.20646	8.71094	7.09905	7.881	9.32039	6.44749
199	8.06539	8.93184	6.7933	10.9654	5.7352	5.73891	6.62295	8.24908	8.83599	9.3577	10.4302	8.26237	6.85718	8.16315	6.95225	8.40578	6.59867	7.32691	8.88734	6.02895
200	6.60351	7.57541	8.27452	7.66032	8.30743	3.37509	7.91749	8.49001	9.40244	7.15987	7.81449	5.48501	7.63537	8.27093	8.8583	7.04269	6.68596	9.57463	6.40889	6.98087
201	6.19748	7.10601	7.73828	7.28326	7.5792	3.44602	7.18812	8.11868	8.68619	6.64002	7.45501	5.04217	7.18656	7.60448	8.19532	6.59845	6.15665	8.92689	5.74837	6.34223
202	5.81099	6.63155	7.19371	6.90175	6.88313	3.50114	6.49418	7.74462	8.01474	6.12924	7.098	4.6239	6.73492	6.95851	7.53797	6.16533	5.64079	8.2988	5.13116	5.7397
203	5.44747	6.16109	6.65149	6.52279	6.22586	3.54423	5.84182	7.37368	7.39103	5.63505	6.74874	4.23338	6.28857	6.34079	6.89663	5.74897	5.14541	7.69676	4.56043	5.17758
204	5.10946	5.70227	6.12074	6.15239	5.61214	3.57873	5.2352	7.01108	6.81685	5.16345	6.41175	3.87266	5.85439	5.75729	6.27985	5.35384	4.67588	7.12601	4.0377	4.65852
205	4.79865	5.26129	5.60895	5.79554	5.04498	3.60769	4.67676	6.66127	6.29298	4.71893	6.09075	3.54278	5.43798	5.21229	5.69434	4.98332	4.23608	6.59059	3.56309	4.18376
206	4.51601	4.84298	5.12202	5.45629	4.52582	3.63385	4.1674	6.32799	5.81928	4.30465	5.78873	3.24402	5.0437	4.70849	5.14503	4.63975	3.82854	6.09337	3.13565	3.75338
207	4.26194	4.45087	4.66429	5.13775	4.05483	3.65959	3.70678	6.01421	5.39484	3.92256	5.50796	2.97598	4.67475	4.24726	4.63519	4.32462	3.4546	5.63613	2.75356	3.36651
208	4.03632	4.08737	4.23875	4.84221	3.63115	3.68703	3.2936	5.72225	5.01814	3.57361	5.2501	2.7378	4.33333	3.8288	4.16667	4.03866	3.11465	5.21968	2.41441	3.02157
209	3.83867	3.75386	3.84713	4.57119	3.25309	3.71801	2.9258	5.45376	4.68723	3.2579	5.01622	2.52824	4.02073	3.45243	3.74005	3.78198	2.80829	4.84402	2.11538	2.71648
210	3.66824	3.4509	3.49018	4.32561	2.91841	3.75414	2.60083	5.20987	4.39982	2.97487	4.80693	2.34582	3.73751	3.11674	3.35494	3.55422	2.53454	4.50847	1.85344	2.44878
211	3.52406	3.17837	3.16777	4.10583	2.62446	3.79681	2.3158	4.99119	4.15346	2.72344	4.62246	2.18891	3.48359	2.81983	3.01017	3.35463	2.29195	4.21187	1.62543	2.21585
212	3.40506	2.93561	2.87913	3.91183	2.36839	3.84727	2.06764	4.79797	3.94561	2.5022	4.46272	2.05583	3.25845	2.55943	2.70399	3.18221	2.0788	3.95265	1.42822	2.01497
213	3.31011	2.72158	2.623	3.74321	2.14721	3.9066	1.85325	4.63012	3.77374	2.30947	4.32736	1.9449	3.06119	2.3331	2.43424	3.03576	1.89315	3.72902	1.25878	1.84343
214	3.2381	2.53496	2.39776	3.59936	1.95798	3.97577	1.66956	4.4873	3.63542	2.14344	4.21588	1.85446	2.89068	2.13827	2.19852	2.91402	1.733	3.53902	1.1142	1.69862
215	3.18793	2.37425	2.20157	3.47949	1.79782	4.05564	1.51362	4.369	3.52832	2.00224	4.12768	1.78298	2.74561	1.9724	1.99431	2.81567	1.59632	3.38065	0.99178	1.57806
216	3.15859	2.23787	2.03247	3.38273	1.66401	4.14703	1.38266	4.27459	3.4503	1.88401	4.06205	1.72902	2.62461	1.83301	1.81903	2.73942	1.48112	3.25191	0.889015	1.47942
217	3.14915	2.1242	1.88844	3.30816	1.554	4.25066	1.27409	4.20338	3.39942	1.78698	4.01832	1.69128	2.52627	1.71774	1.67019	2.68403	1.38552	3.15089	0.803635	1.40059
218	3.15883	2.03167	1.76753	3.25484	1.46546	4.36723	1.18556	4.15463	3.37394	1.70943	3.99579	1.6686	2.44924	1.62441	1.54536	2.64837	1.30775	3.07579	0.733591	1.33966
219	3.18694	1.95877	1.66783	3.22191	1.39628	4.49742	1.11493	4.12764	3.37237	1.64981	3.99383	1.65998	2.39222	1.55101	1.44229	2.6314	1.24617	3.02495	0.677061	1.29493
220	3.23294	1.9041	1.58754	3.20855	1.34458	4.64186	1.06032	4.12173	3.39342	1.6067	4.01185	1.66457	2.35401	1.49571	1.35889	2.63222	1.19932	2.99689	0.632437	1.26491
221	3.29645	1.86639	1.52503	3.21404	1.30871	4.80117	1.02007	4.13629	3.43604	1.57883	4.04937	1.68169	2.33354	1.45691	1.29326	2.65007	1.16588	2.99031	0.59832	1.24833
222	3.37719	1.8445	1.4788	3.23776	1.28724	4.97597	0.992725	4.17079	3.49941	1.5651	4.10599	1.7108	2.32986	1.43322	1.2437	2.68435	1.14471	3.00409	0.573498	1.24409
223	3.47506	1.83744	1.44752	3.27921	1.27896	5.16684	0.977058	4.22478	3.5829	1.56459	4.18139	1.7515	2.34219	1.42343	1.2087	2.73459	1.13482	3.03732	0.556941	1.2513
224	3.59007	1.84438	1.43004	3.33802	1.28288	5.37434	0.972035	4.29793	3.68609	1.57651	4.27537	1.80355	2.36986	1.42654	1.18697	2.80046	1.13539	3.08928	0.547779	1.26927
225	3.72236	1.86464	1.42537	3.41394	1.29817	5.59899	0.976805	4.38997	3.80875	1.60025	4.38783	1.86684	2.4124	1.44173	1.17739	2.88182	1.14574	3.15944	0.545295	1.29743
226	3.87222	1.89769	1.43267	3.50685	1.32421	5.84126	0.990689	4.50077	3.95083	1.63536	4.51876	1.94141	2.46944	1.46838	1.17903	2.97864	1.16534	3.24744	0.548904	1.33541
227	4.04002	1.94317	1.4513	3.61677	1.36054	6.10155	1.01317	4.63027	4.11243	1.68152	4.66825	2.0274	2.5408	1.506	1.19115	3.09104	1.1938	3.35311	0.558145	1.38296
228	4.22627	2.00083	1.48074	3.7438	1.40686	6.38014	1.04387	4.77849	4.2938	1.73857	4.83644	2.12511	2.62643	1.5543	1.21315	3.21929	1.23086	3.47644	0.572672	1.44
229	4.43154	2.0706	1.52063	3.88822	1.46302	6.67719	1.08255	4.94556	4.49531	1.80646	5.02358	2.23495	2.72641	1.61311	1.2446	3.36376	1.27636	3.61758	0.592238	1.50656
230	4.6565	2.15253	1.57077	4.05037	1.52901	6.99267	1.12911	5.13164	4.71746	1.88531	5.22995	2.35744	2.84099	1.68243	1.2852	3.52497	1.3303	3.77683	0.61669	1.5828
231	4.90186	2.24679	1.63106	4.23072	1.60497	7.32634	1.18356	5.33695	4.96079	1.97534	5.45584	2.49324	2.97052	1.76238	1.33482	3.70356	1.39276	3.95462	0.64596	1.66901
232	5.16839	2.35372	1.70156	4.42981	1.69114	7.67766	1.24602	5.56175	5.22593	2.0769	5.70158	2.64311	3.1155	1.85322	1.39341	3.90026	1.46394	4.1515	0.680061	1.76559
233	5.45684	2.47375	1.78244	4.64826	1.7879	8.04575	1.31673	5.80627	5.51353	2.19048	5.96747	2.80792	3.27654	1.95532	1.46109	4.11591	1.54415	4.36812	0.719081	1.87307
234	5.76796	2.60744	1.874	4.88677	1.89575	8.4293	1.39601	6.07075	5.82421	2.31665	6.25374	2.98869	3.45438	2.0692	1.53807	4.35143	1.63379	4.60524	0.763177	1.99207
235	6.10242	2.7555	1.97666	5.14605	2.01532	8.8265	1.48432	6.35533	6.15853	2.45615	6.56053	3.18651	3.64986	2.19548	1.62469	4.6078	1.73337	4.86366	0.812577	2.12334
236	6.46075	2.91871	2.09096	5.42683	2.14733	9.23497	1.58219	6.66006	6.51696	2.60978	6.88784	3.40261	3.86393	2.33492	1.72138	4.88607	1.8435	5.14425	0.867577	2.26774
237	6.84333	3.09802	2.21753	5.72981	2.29263	9.65165	1.69026	6.98485	6.89976	2.7785	7.23544	3.6383	4.09764	2.48838	1.82869	5.18729	1.9649	5.44787	0.928539	2.42626
238	7.25027	3.29444	2.35714	6.05565	2.45221	10.0727	1.80928	7.32936	7.30695	2.96336	7.60286	3.89501	4.35209	2.65685	1.9473	5.51252	2.09839	5.77537	0.995892	2.59998
239	7.68132	3.50911	2.51066	6.40489	2.62714	10.4936	1.9401	7.69301	7.73819	3.16554	7.98927	4.17425	4.62848	2.84143	2.07797	5.86275	2.24489	6.1275	1.07014	2.79012
240	13.2243	11.4145	12.2842	14.2881	10.0538	11.1867	8.80767	10.7376	12.8714	9.54927	9.59608	13.3554	11.6965	11.6721	12.6646	10.6819	9.82389	9.1379	8.78129	10.5639
241	13.5283	11.7101	12.4557	14.2385	10.7326	11.5263	9.48774	11.1404	12.9563	10.0638	10.4198	13.5023	11.9963	11.8266	12.8006	11.1555	10.3558	9.21093	8.84053	10.2833
242	13.8667	12.026	12.6892	14.2136	11.3548	11.8559	10.1121	11.5342	13.0285	10.5419	11.1759	13.6369	12.2641	12.0053	12.9208	11.5988	10.8518	9.36304	8.94745	10.1124
243	14.216	12.349	12.9644	14.1923	11.9171	12.1662	10.6815	11.9106	13.0761	10.9812	11.8627	13.7436	12.4915	12.1952	13.0135	12.0051	11.3085	9.58221	9.09482	10.034
244	14.5532	12.6661	13.2618	14.1561	12.4137	12.4474	11.1949	12.2608	13.0882	11.378	12.4756	13.8081	12.6703	12.3841	13.0681	12.3669	11.7211	9.85766	9.27599	10.0332
245	14.8556	12.9641	13.5626	14.089	12.8375	12.6901	11.649	12.5751	13.056	11.7277	13.0074	13.818	12.7926	12.5603	13.0754	12.6758	12.0838	10.1794	9.4848	10.0967
246	15.1011	13.23	13.8485	13.978	13.1801	12.8847	12.0396	12.844	12.9723	12.025	13.449	13.7629	12.8517	12.7127	13.0278	12.9233	12.39	10.5379	9.71533	10.213
247	15.2688	13.4509	14.1015	13.8126	13.4329	13.0224	12.3613	13.0576	12.8319	12.2642	13.7904	13.6351	12.8421	12.831	12.9199	13.1012	12.6328	10.9237	9.96182	10.3715
248	15.3398	13.6147	14.3044	13.5857	13.5879	13.0951	12.6084	13.2069	12.6319	12.4397	14.0215	13.4297	12.76	12.9059	12.748	13.2019	12.8056	11.3272	10.2185	10.5624
249	15.2983	13.71	14.441	13.2932	13.6381	13.0964	12.7753	13.2837	12.3715	12.5463	14.1331	13.1448	12.6036	12.9293	12.5112	13.2192	12.9021	11.7381	10.4796	10.7765
250	15.1326	13.7275	14.497	12.9343	13.579	13.0213	12.8572	13.2811	12.0525	12.5798	14.1185	12.7819	12.3733	12.8946	12.2105	13.1488	12.9177	12.1459	10.7391	11.0051
251	14.8362	13.6597	14.4604	12.5113	13.4087	12.8672	12.8505	13.1944	11.6786	12.5373	13.9737	12.3455	12.0717	12.7969	11.8495	12.9887	12.849	12.5391	10.9911	11.2396
252	14.4083	13.5017	14.3224	12.0294	13.1286	12.6341	12.7536	13.0214	11.2554	12.4177	13.6991	11.8431	11.7039	12.6334	11.4338	12.7396	12.6951	12.9058	11.2292	11.4715
253	13.8542	13.2521	14.078	11.4962	12.7438	12.3241	12.567	12.7625	10.7903	12.2217	13.2993	11.2842	11.2769	12.4035	10.9707	12.405	12.4571	13.2335	11.4472	11.6927
254	13.1851	12.9124	13.7264	10.9211	12.263	11.9424	12.2936	12.4208	10.2916	11.9522	12.7835	10.6804	10.7993	12.1089	10.4689	11.9912	12.1389	13.5096	11.6389	11.895
255	12.4172	12.4877	13.2716	10.3147	11.6981	11.4962	11.939	12.0026	9.76852	11.6143	12.1653	10.044	10.2812	11.7533	9.93788	11.507	11.7467	13.7217	11.7982	12.0705
256	11.5704	11.986	12.7215	9.68819	11.0634	10.9947	11.5112	11.5163	9.23029	11.2149	11.4615	9.38788	9.73307	11.3428	9.38766	10.9635	11.2891	13.8581	11.9194	12.2116
257	10.6671	11.4181	12.088	9.05283	10.3749	10.4486	11.02	10.9726	8.6861	10.7625	10.6913	8.72432	9.16585	10.8848	8.828	10.373	10.7762	13.9086	11.9972	12.3115
258	9.72989	10.7967	11.386	8.41916	9.6495	9.86938	10.477	10.3835	8.14451	10.267	9.87515	8.06482	8.59006	10.3881	8.26819	9.74862	10.2196	13.8653	12.0272	12.3639
259	8.78088	10.1358	10.6323	7.79676	8.90369	9.26888	9.89461	9.76198	7.61328	9.73887	9.03315	7.41955	8.01553	9.86229	7.71671	9.10364	9.63144	13.7228	12.006	12.3638
260	7.83986	9.44954	9.84446	7.19392	8.15303	8.65858	9.28576	9.12085	7.09911	9.18894	8.18428	6.79709	7.45109	9.31741	7.18093	8.45079	9.02397	13.4792	11.9312	12.3074
261	6.9238	8.75199	9.03996	6.61748	7.41145	8.04921	8.66292	8.47259	6.60758	8.62776	7.3454	6.20434	6.9043	8.76319	6.66704	7.80174	8.40892	13.1359	11.8019	12.1924
262	6.04632	8.05607	8.23504	6.0728	6.69079	7.45038	8.03782	7.82859	6.14311	8.06524	6.53076	5.64654	6.38141	8.20889	6.17999	7.16673	7.79707	12.6984	11.6186	12.0181
263	5.2176	7.37325	7.44408	5.56378	6.00063	6.87031	7.42101	7.19887	5.709	7.51034	5.75171	5.1273	5.88729	7.66292	5.72351	6.55436	7.19795	12.1755	11.3834	11.7856
264	4.44459	6.71323	6.67919	5.09299	5.34824	6.31573	6.82154	6.59185	5.30751	6.97082	5.01668	4.64885	5.42552	7.13258	5.3002	5.97148	6.61959	11.579	11.0996	11.498
265	3.73128	6.08378	5.95	4.66182	4.73873	5.79187	6.24685	6.01423	4.93997	6.45316	4.33141	4.21214	4.99848	6.62402	4.91163	5.42325	6.06845	10.923	10.7719	11.1595
266	3.07923	5.49079	5.26361	4.27066	4.17522	5.30251	5.70273	5.47106	4.60692	5.96247	3.69918	3.81713	4.60752	6.14211	4.55852	4.9132	5.54944	10.2229	10.4063	10.7763
267	2.48797	4.93832	4.62483	3.91909	3.65915	4.8501	5.19342	4.9658	4.30826	5.50261	3.12125	3.46296	4.25306	5.69055	4.24084	4.44344	5.06604	9.49459	10.0094	10.3554
268	1.9555	4.42881	4.03636	3.60605	3.19055	4.43597	4.72168	4.50055	4.04337	5.0762	2.5972	3.14815	3.93484	5.27189	3.95801	4.01487	4.62037	8.7535	9.58846	9.9046
269	1.47871	3.96332	3.49917	3.33002	2.76836	4.06046	4.28905	4.07616	3.81122	4.68483	2.12532	2.87078	3.65199	4.88768	3.70898	3.62736	4.21347	8.01396	9.15087	9.43236
270	1.05368	3.54176	3.01278	3.08915	2.39067	3.72313	3.89598	3.69255	3.61053	4.32915	1.70295	2.62864	3.40326	4.53863	3.4924	3.27999	3.84539	7.28856	8.7041	8.94703
271	0.676064	3.16314	2.57561	2.88137	2.05496	3.4229	3.54205	3.3488	3.43983	4.0091	1.32679	2.41937	3.18705	4.22471	3.30672	2.97124	3.51546	6.5879	8.25524	8.45676
272	0.341234	2.82575	2.18524	2.70453	1.75834	3.15829	3.22618	3.04343	3.29755	3.72398	0.99311	2.24051	3.00162	3.94533	3.15025	2.69915	3.22244	5.92037	7.81086	7.96915
273	0.0445248	2.52743	1.83871	2.55647	1.49768	2.92747	2.94677	2.77453	3.1821	3.47268	0.69797	2.08968	2.84513	3.69946	3.02129	2.46149	2.96464	5.29223	7.37683	7.49103
274	-0.218662	2.26567	1.53269	2.43508	1.26977	2.72844	2.70192	2.53993	3.09193	3.25375	0.437375	1.96453	2.71572	3.48576	2.91816	2.25588	2.74013	4.70769	6.95824	7.02834
275	-0.452753	2.0378	1.26365	2.33836	1.07141	2.5591	2.48946	2.33727	3.02557	3.06553	0.207384	1.86288	2.61156	3.3027	2.83922	2.07988	2.5468	4.1692	6.55929	6.58603
276	-0.661944	1.84108	1.02806	2.26442	0.899488	2.41736	2.30716	2.16419	2.98164	2.90626	0.00419606	1.7827	2.53094	3.14862	2.78298	1.93107	2.38249	3.67767	6.18336	6.16807
277	-0.850161	1.67279	0.822389	2.21158	0.751061	2.30117	2.15275	2.01831	2.9589	2.77414	-0.175797	1.72213	2.47225	3.02183	2.74807	1.80714	2.24504	3.23276	5.83301	5.77744
278	-1.02104	1.53031	0.643277	2.17831	0.623357	2.20858	2.02402	1.89737	2.95627	2.66741	-0.335971	1.67953	2.43405	2.92067	2.73327	1.7059	2.13237	2.83317	5.51005	5.41626
279	-1.17793	1.41115	0.48753	2.16329	0.513817	2.13779	1.91886	1.79922	2.97283	2.58437	-0.479454	1.65345	2.41504	2.84355	2.73752	1.62532	2.04251	2.47684	5.2156	5.08583
280	-0.499479	2.69696	0.313888	-0.728996	-0.346717	1.68252	2.26624	3.68282	0.393542	-1.39887	1.04234	1.27758	1.26128	0.967402	1.57021	2.01286	-0.00890258	3.01119	3.54534	1.9019
281	-0.944636	2.0027	0.0093984	-0.814627	-0.49957	1.15943	1.63702	3.05054	-0.11491	-1.73847	0.506271	0.618473	0.765205	0.490808	1.14733	1.57426	-0.315581	2.44523	3.16246	1.77516
282	-1.34332	1.38877	-0.261112	-0.891942	-0.636376	0.694426	1.08121	2.50339	-0.567415	-2.04439	0.0329048	0.0353001	0.323553	0.0672533	0.770789	1.18532	-0.588516	1.9565	2.83062	1.6634
283	-1.70338	0.846912	-0.501845	-0.962529	-0.759567	0.281842	0.590831	2.03146	-0.970235	-2.32223	-0.386239	-0.481618	-0.0690147	-0.309036	0.436419	0.841473	-0.83135	1.53531	2.54535	1.56613
284	-2.032	0.368833	-0.716853	-1.02788	-0.871435	-0.0840898	0.157996	1.62545	-1.32958	-2.5772	-0.759117	-0.941532	-0.417951	-0.643794	0.139898	0.538024	-1.04775	1.17272	2.30228	1.48275
285	-2.33565	-0.0535205	-0.909982	-1.08937	-0.974125	-0.409058	-0.224861	1.27673	-1.65147	-2.81407	-1.09309	-1.35311	-0.728648	-0.942577	-0.123093	0.270367	-1.24131	0.860548	2.09724	1.41257
286	-2.62017	-0.427808	-1.08484	-1.14828	-1.06962	-0.698548	-0.56487	0.977456	-1.9416	-3.03718	-1.3949	-1.72436	-1.00632	-1.21067	-0.356768	0.034049	-1.41549	0.591434	1.92636	1.35487
287	-2.89081	-0.76119	-1.24476	-1.2058	-1.15977	-0.957755	-0.868657	0.720527	-2.20532	-3.2505	-1.67068	-2.06259	-1.2559	-1.45303	-0.565159	-0.175148	-1.57356	0.358787	1.78606	1.30894
288	-3.15226	-1.06028	-1.39285	-1.26301	-1.24626	-1.19154	-1.14231	0.499611	-2.44759	-3.4576	-1.92597	-2.37445	-1.48203	-1.67425	-0.752069	-0.36117	-1.71861	0.15676	1.67309	1.27408
289	-3.40872	-1.33112	-1.53194	-1.32093	-1.33066	-1.40439	-1.39139	0.309086	-2.67296	-3.66171	-2.16576	-2.66591	-1.68902	-1.87858	-0.921044	-0.527671	-1.85349	-0.0198138	1.58457	1.24965
290	-3.66398	-1.57922	-1.66461	-1.38049	-1.41439	-1.60045	-1.62092	0.143995	-2.88557	-3.86575	-2.39454	-2.94236	-1.88081	-2.06989	-1.07536	-0.678004	-1.98084	-0.175477	1.51792	1.23503
291	-3.92143	-1.80954	-1.79325	-1.44259	-1.49879	-1.7835	-1.83547	-1.63868e-05	-3.08921	-4.07236	-2.61635	-3.20861	-2.06104	-2.25172	-1.21804	-0.81523	-2.10308	-0.314214	1.47091	1.22973
292	-4.18411	-2.02657	-1.92004	-1.50805	-1.58512	-1.95697	-2.03913	-0.126758	-3.2873	-4.28393	-2.83484	-3.46897	-2.23302	-2.42729	-1.35183	-0.942132	-2.22246	-0.439518	1.44162	1.23329
293	-4.45479	-2.23435	-2.04697	-1.57769	-1.67454	-2.124	-2.23561	-0.239559	-3.48294	-4.5026	-3.05331	-3.72732	-2.39976	-2.59955	-1.47925	-1.06123	-2.34101	-0.554448	1.42842	1.24535
294	-4.73593	-2.43653	-2.17591	-1.65227	-1.76816	-2.28744	-2.42827	-0.341323	-3.67896	-4.73033	-3.27475	-3.98711	-2.56402	-2.77117	-1.60261	-1.17482	-2.46063	-0.661694	1.42997	1.26563
295	-5.02977	-2.63641	-2.30858	-1.73258	-1.86707	-2.4499	-2.62014	-0.434587	-3.87789	-4.96887	-3.50191	-4.25146	-2.72833	-2.9446	-1.72402	-1.28498	-2.58306	-0.763625	1.44516	1.29394
296	-5.33831	-2.83699	-2.44661	-1.81938	-1.9723	-2.61377	-2.81401	-0.521575	-4.08206	-5.21982	-3.73731	-4.52316	-2.895	-3.12212	-1.8454	-1.39361	-2.70993	-0.862343	1.47315	1.33018
297	-5.66331	-3.04101	-2.59155	-1.91344	-2.0849	-2.78126	-3.01242	-0.60424	-4.29358	-5.48457	-3.9833	-4.80472	-3.06617	-3.30582	-1.96856	-1.50245	-2.84277	-0.959731	1.5133	1.37431
298	-6.00629	-3.251	-2.74489	-2.01558	-2.2059	-2.95443	-3.21773	-0.684312	-4.51438	-5.76435	-4.24203	-5.09838	-3.24382	-3.49765	-2.09517	-1.61311	-2.98302	-1.05749	1.56517	1.42642
299	-6.3685	-3.46929	-2.90807	-2.12661	-2.33635	-3.1352	-3.43216	-0.763337	-4.74621	-6.06022	-4.51555	-5.40614	-3.42984	-3.69946	-2.2268	-1.7271	-3.13207	-1.15717	1.62852	1.48666
300	-6.7509	-3.6981	-3.08253	-2.24741	-2.47732	-3.32539	-3.65778	-0.842712	-4.99067	-6.37301	-4.80575	-5.72975	-3.62598	-3.91299	-2.36496	-1.84586	-3.29125	-1.26023	1.70329	1.55525
301	-7.1541	-3.93946	-3.26969	-2.37889	-2.62993	-3.52676	-3.89657	-0.923714	-5.24923	-6.70333	-5.1144	-6.07069	-3.83392	-4.13989	-2.51109	-1.97076	-3.46187	-1.36804	1.78956	1.63253
302	-7.57827	-4.19536	-3.47095	-2.52203	-2.79534	-3.74097	-4.15043	-1.00753	-5.52317	-7.05151	-5.44312	-6.43018	-4.05527	-4.38177	-2.66662	-2.10313	-3.64522	-1.48191	1.88759	1.71891
303	-8.02312	-4.46764	-3.68775	-2.67785	-2.97475	-3.96966	-4.42115	-1.0953	-5.81365	-7.41757	-5.7934	-6.80912	-4.29158	-4.64014	-2.83295	-2.24428	-3.84257	-1.60313	1.99778	1.81488
304	-8.48773	-4.75808	-3.92152	-2.84745	-3.16944	-4.21442	-4.71049	-1.18809	-6.12163	-7.80115	-6.16651	-7.20806	-4.54435	-4.91645	-3.01147	-2.39553	-4.05517	-1.73301	2.12066	1.92103
305	-8.9705	-5.06836	-4.17374	-3.032	-3.38074	-4.47679	-5.02009	-1.28699	-6.44788	-8.20144	-6.56349	-7.62711	-4.81501	-5.21208	-3.2036	-2.55822	-4.28431	-1.87282	2.25692	2.03803
306	-9.46896	-5.40005	-4.44586	-3.23276	-3.61004	-4.75828	-5.35152	-1.39305	-6.79293	-8.6171	-6.98511	-8.06591	-5.10494	-5.52831	-3.41075	-2.73369	-4.53123	-2.02393	2.40736	2.16667
307	-9.97968	-5.7546	-4.73937	-3.45104	-3.85881	-5.06036	-5.70625	-1.50736	-7.15703	-9.04618	-7.43171	-8.52346	-5.41543	-5.86631	-3.6344	-2.92335	-4.79717	-2.1877	2.57293	2.3078
308	-10.4981	-6.13327	-5.05572	-3.68825	-4.12858	-5.3844	-6.08556	-1.63105	-7.54009	-9.486	-7.90322	-8.9981	-5.74768	-6.22707	-3.87603	-3.12865	-5.08336	-2.36561	2.7547	2.46238
309	-11.0185	-6.53714	-5.39632	-3.94587	-4.42092	-5.73171	-6.49055	-1.76528	-7.9416	-9.93311	-8.39892	-9.48731	-6.10275	-6.6114	-4.13716	-3.35108	-5.39097	-2.55917	2.95388	2.6315
310	-11.5336	-6.96697	-5.76252	-4.22542	-4.73744	-6.10343	-6.92205	-1.91128	-8.36059	-10.3831	-8.91737	-9.98762	-6.48149	-7.01982	-4.41934	-3.59223	-5.72109	-2.77002	3.1718	2.81631
311	-12.0351	-7.42317	-6.15553	-4.52852	-5.07974	-6.50054	-7.3805	-2.07036	-8.79547	-10.8308	-9.45625	-10.4945	-6.88455	-7.45252	-4.72413	-3.85372	-6.07471	-2.99988	3.40992	3.01809
312	-12.5128	-7.90568	-6.57638	-4.85678	-5.44944	-6.92376	-7.86592	-2.24393	-9.24399	-11.2697	-10.0121	-11.0022	-7.31223	-7.90924	-5.05308	-4.13724	-6.45266	-3.25059	3.66982	3.23824
313	-12.9557	-8.41381	-7.02582	-5.21183	-5.84803	-7.37344	-8.37769	-2.43347	-9.70311	-11.6925	-10.5804	-11.5037	-7.76441	-8.38914	-5.40772	-4.44452	-6.85552	-3.52407	3.95316	3.47823
314	-13.3515	-8.94614	-7.50424	-5.59527	-6.27693	-7.84952	-8.91445	-2.64059	-10.1689	-12.091	-11.1548	-11.9906	-8.24048	-8.89071	-5.78947	-4.77733	-7.2836	-3.82239	4.26175	3.73965
315	-13.6872	-9.50029	-8.0115	-6.00859	-6.73729	-8.35134	-9.47392	-2.86702	-10.6365	-12.4561	-11.7278	-12.4533	-8.73913	-9.41159	-6.19967	-5.13745	-7.7368	-4.1477	4.59744	4.02421
316	-13.9497	-10.0728	-8.54685	-6.45314	-7.22996	-8.87753	-10.0527	-3.11462	-11.0998	-12.778	-12.2897	-12.8809	-9.25829	-9.94839	-6.63942	-5.52662	-8.21449	-4.50223	4.96215	4.33365
317	-14.1265	-10.6588	-9.10869	-6.93	-7.75537	-9.4258	-10.6459	-3.38536	-11.5518	-13.0468	-12.8295	-13.2616	-9.79488	-10.4966	-7.10953	-5.94648	-8.71542	-4.88829	5.35779	4.66983
318	-14.2064	-11.2519	-9.69437	-7.43991	-8.31329	-9.99281	-11.2473	-3.68136	-11.9843	-13.2525	-13.3342	-13.583	-10.3447	-11.0503	-7.61044	-6.39854	-9.23753	-5.3082	5.78624	5.03459
319	-14.1804	-11.8441	-10.3	-7.98306	-8.90271	-10.5739	-11.8488	-4.00484	-12.3882	-13.3859	-13.7894	-13.8325	-10.9023	-11.602	-8.142	-6.88405	-9.77778	-5.76425	6.24928	5.42981
320	-11.0981	-12.0564	-11.4501	-11.0532	-9.20594	-9.88272	-7.57358	-9.50862	-10.4461	-11.8981	-11.7937	-10.7701	-11.1084	-8.47801	-7.43481	-10.8658	-9.25991	-15.0329	-13.9412	-10.9455
321	-11.6496	-12.2161	-11.818	-11.1418	-9.5818	-10.3144	-8.12137	-10.0292	-10.7272	-12.1469	-12.1342	-11.2802	-11.9518	-8.94393	-8.07972	-11.3644	-9.70311	-15.0139	-14.3345	-11.5669
322	-12.2681	-12.4952	-12.2631	-11.4017	-10.089	-10.8328	-8.73497	-10.6132	-11.1439	-12.571	-12.6301	-11.9181	-12.8251	-9.49442	-8.76541	-11.926	-10.2091	-15.1441	-14.835	-12.1788
323	-12.9359	-12.8675	-12.7656	-11.804	-10.7108	-11.4236	-9.41046	-11.25	-11.6742	-13.1375	-13.2515	-12.662	-13.7136	-10.1203	-9.49134	-12.5344	-10.7678	-15.3803	-15.4056	-12.7707
324	-13.634	-13.308	-13.3054	-12.3232	-11.4319	-12.0721	-10.1433	-11.9281	-12.2975	-13.8164	-13.9698	-13.4902	-14.598	-10.8123	-10.2553	-13.1724	-11.3689	-15.6825	-16.009	-13.3297
325	-14.3408	-13.7929	-13.8618	-12.9353	-12.2372	-12.7628	-10.9276	-12.6342	-12.9936	-14.5775	-14.756	-14.3789	-15.4543	-11.5605	-11.0529	-13.8211	-12.0007	-16.0126	-16.6069	-13.8412
326	-15.0325	-14.2978	-14.4128	-13.6167	-13.1099	-13.4782	-11.7555	-13.353	-13.7412	-15.3894	-15.5786	-15.3011	-16.2534	-12.353	-11.8773	-14.4593	-12.6503	-16.334	-17.1591	-14.2889
327	-15.6819	-14.7979	-14.935	-14.3427	-14.0308	-14.1985	-12.6164	-14.0663	-14.5168	-16.2173	-16.4027	-16.2248	-16.9616	-13.1756	-12.7184	-15.0637	-13.3026	-16.6114	-17.6244	-14.6558
328	-16.2594	-15.2671	-15.4035	-15.0863	-14.9764	-14.9009	-13.4965	-14.7531	-15.294	-17.0227	-17.189	-17.1128	-17.5416	-14.0107	-13.5626	-15.6087	-13.9402	-16.8111	-17.9616	-14.9246
329	-16.7335	-15.6789	-15.7929	-15.8176	-15.9185	-15.5596	-14.3774	-15.3892	-16.0426	-17.7622	-17.894	-17.9219	-17.9547	-14.8369	-14.392	-16.0671	-14.5434	-16.9023	-18.1313	-15.0792
330	-17.0722	-16.0066	-16.0776	-16.5033	-16.8227	-16.1459	-15.2364	-15.9478	-16.7287	-18.3891	-18.4706	-18.6038	-18.1634	-15.6284	-15.1846	-16.4112	-15.0903	-16.8583	-18.0997	-15.1057
331	-17.245	-16.2243	-16.2338	-17.1071	-17.6488	-16.6292	-16.0458	-16.4007	-17.3153	-18.854	-18.8707	-19.1073	-18.1355	-16.3552	-15.9138	-16.6145	-15.5572	-16.6584	-17.841	-14.9938
332	-17.2261	-16.3086	-16.2406	-17.5906	-18.3512	-16.9783	-16.7731	-16.7189	-17.7635	-19.1088	-19.0482	-19.382	-17.848	-16.9834	-16.5494	-16.6533	-15.9196	-16.2899	-17.3413	-14.738
333	-16.9964	-16.24	-16.0825	-17.9152	-18.8811	-17.1633	-17.3819	-16.8755	-18.0351	-19.1107	-18.9639	-19.3828	-17.291	-17.4767	-17.0586	-16.5095	-16.1537	-15.7487	-16.6009	-14.3386
334	-16.5467	-16.005	-15.7507	-18.045	-19.1896	-17.1585	-17.834	-16.8475	-18.0954	-18.8273	-18.5903	-19.0759	-16.4703	-17.7987	-17.4079	-16.1725	-16.2379	-15.0407	-15.6348	-13.8019
335	-15.8796	-15.5976	-15.2443	-17.95	-19.2325	-16.9451	-18.0917	-16.6189	-17.9171	-18.2412	-17.9164	-18.4445	-15.4079	-17.9156	-17.5657	-15.6409	-16.1548	-14.1809	-14.4723	-13.1403
336	-15.0097	-15.0203	-14.5716	-17.6099	-18.9758	-16.5134	-18.1215	-16.1823	-17.4841	-17.3547	-16.9505	-17.4928	-14.1407	-17.7997	-17.5056	-14.9235	-15.8935	-13.1927	-13.1534	-12.3713
337	-13.9629	-14.2843	-13.7489	-17.0174	-18.4009	-15.8655	-17.8982	-15.5411	-16.7944	-16.19	-15.7209	-16.2473	-12.7162	-17.4337	-17.2098	-14.0388	-15.4506	-12.1048	-11.7248	-11.5164
338	-12.7743	-13.4087	-12.8	-16.18	-17.5096	-15.0152	-17.4086	-14.7098	-15.8616	-14.7885	-14.273	-14.7548	-11.1875	-16.813	-16.6718	-13.0138	-14.8318	-10.9495	-10.2349	-10.5992
339	-11.4842	-12.4192	-11.7536	-15.1203	-16.325	-13.9877	-16.6547	-13.7128	-14.7141	-13.2053	-12.6642	-13.0766	-9.60813	-15.9482	-15.8988	-11.8814	-14.0513	-9.75907	-8.72973	-9.64428
340	-10.1348	-11.3454	-10.6411	-13.874	-14.8903	-12.8171	-15.6544	-12.5828	-13.3927	-11.5031	-10.9568	-11.2814	-8.02668	-14.8644	-14.9114	-10.6773	-13.1316	-8.56405	-7.24895	-8.67488
341	-8.76615	-10.2188	-9.49392	-12.4864	-13.2638	-11.5431	-14.4409	-11.357	-11.946	-9.74494	-9.21164	-9.43661	-6.48413	-13.5994	-13.7425	-9.43718	-12.101	-7.39091	-5.82448	-7.71216
342	-7.41368	-9.06998	-8.34147	-11.0071	-11.5117	-10.2074	-13.0591	-10.0746	-10.4254	-7.98805	-7.48256	-7.60271	-5.012	-12.1996	-12.4338	-8.19404	-10.9913	-6.26123	-4.47962	-6.77412
343	-6.10632	-7.92659	-7.20929	-9.48549	-9.70053	-8.84981	-11.5608	-8.77259	-8.88003	-6.27981	-5.81291	-5.8286	-3.63228	-10.7151	-11.0315	-6.97622	-9.83533	-5.19123	-3.22957	-5.87518
344	-4.86587	-6.81223	-6.11818	-7.96646	-7.89076	-7.50577	-9.99924	-7.48412	-7.35308	-4.65595	-4.23448	-4.15019	-2.35832	-9.19504	-9.58216	-5.80639	-8.6642	-4.19201	-2.08247	-5.02607
345	-3.70718	-5.74555	-5.08386	-6.48752	-6.13211	-6.20441	-8.42408	-6.23636	-5.8795	-3.14058	-2.76799	-2.59088	-1.19624	-7.68331	-8.12853	-4.70132	-7.50566	-3.27001	-1.04078	-4.23407
346	-2.6389	-4.74021	-4.11712	-5.07747	-4.4619	-4.96783	-6.87805	-5.05006	-4.48512	-1.74755	-1.42456	-1.16333	-0.146612	-6.2162	-6.70695	-3.6721	-6.38275	-2.42779	-0.1027	-3.50336
347	-1.66454	-3.80513	-3.22434	-3.7564	-2.90508	-3.81126	-5.3948	-3.9396	-3.18703	-0.482429	-0.207792	0.128263	0.794021	-4.82124	-5.34588	-2.72491	-5.31323	-1.66484	0.736602	-2.83552
348	-0.783597	-2.94511	-2.40816	-2.53642	-1.4758	-2.74372	-3.99847	-2.91362	-1.9947	0.655388	0.884263	1.2858	1.63183	-3.51727	-4.06569	-1.86179	-4.3097	-0.978308	1.48392	-2.23001
349	0.00737782	-2.16155	-1.66825	-1.42305	-0.179574	-1.7691	-2.70438	-1.97594	-0.91142	1.67079	1.85731	2.31526	2.37465	-2.31537	-2.87924	-1.08164	-3.37999	-0.363686	2.14719	-1.68471
350	0.713867	-1.45316	-1.00203	-0.416658	0.984465	-0.887197	-1.52032	-1.12654	0.0641748	2.57138	2.71935	3.22505	3.03112	-1.22025	-1.793	-0.38097	-2.52786	0.184601	2.73487	-1.19629
351	1.34263	-0.816695	-0.405302	0.486163	2.02153	-0.0948268	-0.448131	-0.362567	0.93674	3.36622	3.47964	4.02485	3.61018	-0.231641	-0.80834	0.245302	-1.75379	0.672757	3.25548	-0.760654
352	1.9011	-0.247516	0.127199	1.29135	2.93953	0.613284	0.514692	0.32086	1.71308	4.06502	4.14783	4.72468	4.12063	0.654248	0.0771538	0.803305	-1.0557	1.10726	3.71732	-0.373213
353	2.39698	0.259898	0.601368	2.00643	3.7478	1.24373	1.37368	0.929917	2.40125	4.6775	4.73352	5.33441	4.57086	1.44361	0.868559	1.29972	-0.429713	1.49462	4.12826	-0.0291365
354	2.83791	0.711558	1.0234	2.63974	4.45624	1.80384	2.13625	1.47152	3.00988	5.213	5.24585	5.86338	4.96872	2.14409	1.57266	1.74144	0.129307	1.84116	4.49559	0.276457
355	3.23126	1.11366	1.39953	3.19992	5.07468	2.30123	2.81085	1.95292	3.54768	5.68027	5.69335	6.32024	5.3214	2.76407	2.19722	2.1353	0.627252	2.15293	4.82602	0.548366
356	3.58397	1.47238	1.73585	3.69548	5.61252	2.7435	3.40634	2.38135	4.02316	6.08732	6.08381	6.71284	5.63543	3.31215	2.75042	2.48792	1.0704	2.43562	5.12562	0.791206
357	3.90252	1.79369	2.0382	4.13462	6.0785	3.13797	3.93152	2.76388	4.44437	6.44143	6.42427	7.04826	5.91665	3.79678	3.24046	2.80555	1.46512	2.69449	5.39979	1.00935
358	4.19283	2.08328	2.31208	4.52498	6.48063	3.4916	4.39488	3.1072	4.81877	6.74905	6.72099	7.33279	6.17025	4.22606	3.67529	3.09406	1.8177	2.93439	5.65335	1.20688
359	4.46026	2.34647	2.5626	4.87365	6.82612	3.81085	4.8044	3.41759	5.15321	7.01596	6.97953	7.57203	6.40078	4.60754	4.06246	3.35882	2.13417	3.15975	5.89052	1.38759
360	6.96361	6.06888	3.88986	4.57212	5.20668	5.79729	6.8623	6.55969	5.21714	6.15845	3.51765	3.8329	5.5307	6.10323	5.75685	4.40421	5.05555	4.61572	7.58248	5.01999
361	6.72422	5.989	4.08711	4.50952	5.05733	5.77539	7.07398	6.37724	5.13865	5.80703	3.47899	3.87958	5.52048	5.83848	5.75828	4.55821	4.99332	4.59995	7.27563	5.03033
362	6.51555	5.91547	4.26175	4.45721	4.92737	5.76945	7.25349	6.20183	5.06208	5.49071	3.44598	3.92843	5.53071	5.63058	5.77732	4.69434	4.95124	4.59397	7.02177	5.04196
363	6.33665	5.8501	4.41827	4.41636	4.81717	5.77962	7.40509	6.03601	4.99002	5.20914	3.42006	3.98126	5.56092	5.47433	5.8138	4.81664	4.92906	4.59881	6.81653	5.05702
364	6.18652	5.79437	4.56072	4.38788	4.72687	5.80594	7.53252	5.88187	4.92462	4.96163	3.40244	4.03967	5.61064	5.3651	5.8675	4.92875	4.92648	4.61536	6.65595	5.07733
365	6.06412	5.74953	4.69277	4.37254	4.65648	5.8484	7.63911	5.74112	4.86772	4.74717	3.3941	4.10505	5.67945	5.29881	5.93824	5.03392	4.94321	4.64433	6.53642	5.10447
366	5.9684	5.71659	4.8177	4.3709	4.60587	5.90696	7.72782	5.61511	4.82079	4.56457	3.39586	4.17864	5.76696	5.27189	6.02579	5.13502	4.97897	4.68636	6.45471	5.13978
367	5.89833	5.69635	4.93841	4.38344	4.57483	5.98154	7.80123	5.50487	4.78507	4.41251	3.4084	4.26156	5.8728	5.28124	6.12991	5.23461	5.03349	4.74195	6.4079	5.18442
368	5.85289	5.68947	5.05749	4.41053	4.56312	6.07202	7.86164	5.41119	4.76154	4.28961	3.4323	4.35478	5.99665	5.32421	6.25036	5.33491	5.10655	4.81157	6.39336	5.23937
369	5.83113	5.69644	5.17722	4.45249	4.57047	6.17827	7.91109	5.3346	4.75099	4.1945	3.46807	4.45922	6.13817	5.39854	6.38687	5.43787	5.19795	4.89562	6.40878	5.30545
370	5.83213	5.71764	5.29958	4.50959	4.59662	6.30011	7.95137	5.27547	4.75407	4.12584	3.51615	4.5757	6.29704	5.50234	6.53915	5.5452	5.30754	4.99445	6.45208	5.38339
371	5.85506	5.75338	5.42633	4.58207	4.64133	6.43734	7.98407	5.23401	4.77128	4.08236	3.57698	4.70497	6.47293	5.63402	6.70686	5.65835	5.43521	5.10841	6.5214	5.47377
372	5.89912	5.80384	5.55897	4.67018	4.70441	6.58971	8.01057	5.21031	4.80303	4.06292	3.65095	4.84774	6.66545	5.79225	6.88958	5.77858	5.58086	5.2378	6.61509	5.57711
373	5.9636	5.86917	5.69881	4.77415	4.7857	6.75691	8.03212	5.20441	4.84967	4.06646	3.73849	5.00467	6.87418	5.9759	7.08685	5.90697	5.74443	5.38292	6.73162	5.69384
374	6.04784	5.94945	5.84696	4.89423	4.88509	6.93857	8.0498	5.21626	4.91147	4.09209	3.84003	5.17639	7.09858	6.18404	7.29806	6.0444	5.92585	5.54404	6.86961	5.8243
375	6.15122	6.04473	6.00435	5.03068	5.00253	7.1342	8.06456	5.24579	4.98868	4.13906	3.95601	5.36347	7.33804	6.41581	7.5225	6.19161	6.12504	5.72138	7.02776	5.96878
376	6.27318	6.15497	6.17175	5.18375	5.13801	7.34324	8.07724	5.29288	5.08153	4.20674	4.08694	5.56643	7.59174	6.67042	7.75931	6.34916	6.34191	5.91517	7.20481	6.12748
377	6.41315	6.28013	6.34975	5.35372	5.29157	7.56498	8.08855	5.35745	5.19022	4.29467	4.23332	5.78575	7.85872	6.94709	8.00741	6.5175	6.57628	6.12554	7.3995	6.30053
378	6.57061	6.4201	6.53882	5.54084	5.46328	7.79852	8.09914	5.43939	5.31494	4.4025	4.39573	6.02182	8.13776	7.24496	8.26553	6.69689	6.82789	6.35257	7.61055	6.48798
379	6.74499	6.5747	6.73923	5.74536	5.65322	8.04282	8.10953	5.53859	5.45587	4.53004	4.57473	6.27494	8.4274	7.56302	8.53214	6.88747	7.09637	6.59627	7.83659	6.68978
380	6.93571	6.74372	6.95108	5.9675	5.86147	8.29658	8.12019	5.65497	5.6132	4.6772	4.77096	6.54529	8.72583	7.90008	8.80541	7.0892	7.38115	6.85649	8.07614	6.90575
381	7.14211	6.92682	7.17433	6.2074	6.0881	8.55828	8.13151	5.78843	5.78705	4.84401	4.98505	6.83291	9.03092	8.25464	9.08323	7.30188	7.68148	7.13294	8.32755	7.13559
382	7.36344	7.1236	7.4087	6.46515	6.33312	8.82609	8.14379	5.93888	5.97756	5.03057	5.21763	7.13764	9.34012	8.62485	9.36312	7.52512	7.99634	7.42514	8.58898	7.37884
383	7.59882	7.33353	7.65372	6.7407	6.59647	9.09789	8.15731	6.10622	6.18478	5.23707	5.46933	7.45908	9.6505	9.0084	9.64225	7.75834	8.32438	7.73237	8.85833	7.63485
384	7.84724	7.55593	7.90868	7.03385	6.87796	9.37125	8.17225	6.29032	6.40874	5.46375	5.74074	7.79657	9.95865	9.40243	9.91746	8.00072	8.66389	8.05362	9.13323	7.90275
385	8.10747	7.78997	8.17262	7.34422	7.17726	9.64338	8.18876	6.49098	6.64934	5.71084	6.03239	8.14908	10.2607	9.80348	10.1852	8.25121	9.01273	8.38753	9.41101	8.1814
386	8.37803	8.03461	8.44427	7.67116	7.49381	9.91114	8.20693	6.70797	6.90639	5.9786	6.34469	8.51517	10.5525	10.2074	10.4416	8.50848	9.36826	8.73237	9.68865	8.46941
387	8.65721	8.28861	8.72207	8.01373	7.82679	10.1711	8.22681	6.94094	7.17952	6.26723	6.67793	8.89293	10.8292	10.6092	10.6825	8.77093	9.72732	9.08592	9.96278	8.76502
388	8.94297	8.55044	9.00411	8.37062	8.17507	10.4194	8.2484	7.18943	7.4682	6.5768	7.03217	9.27991	11.0859	11.0032	10.9036	9.03663	10.0862	9.44546	10.2297	9.06612
389	9.23293	8.81832	9.28813	8.74006	8.53711	10.6521	8.27168	7.45281	7.77164	6.9073	7.40722	9.67301	11.3173	11.383	11.1004	9.30335	10.4404	9.80773	10.4855	9.37023
390	9.52434	9.09015	9.57149	9.1198	8.91091	10.8649	8.29656	7.73027	8.08879	7.25846	7.80255	10.0685	11.5182	11.7412	11.2683	9.5685	10.7851	10.1688	10.7257	9.67443
391	9.81409	9.36351	9.85116	9.50701	9.29394	11.0536	8.32294	8.02074	8.41823	7.62977	8.21719	10.4618	11.6832	12.0702	11.4031	9.82918	11.1146	10.5243	10.9459	9.97536
392	10.0986	9.63563	10.1237	9.8982	9.68308	11.2138	8.35068	8.32288	8.75818	8.02035	8.64967	10.8478	11.8074	12.3615	11.5006	10.0821	11.4229	10.8689	11.1416	10.2692
393	10.3741	9.9034	10.3855	10.2892	10.0745	11.3414	8.37961	8.63503	9.1064	8.4289	9.09787	11.2204	11.8861	12.6068	11.5573	10.3239	11.7036	11.197	11.3081	10.5519
394	10.6363	10.1634	10.6324	10.6751	10.4637	11.4325	8.40954	8.95513	9.46014	8.85355	9.55892	11.573	11.9157	12.7976	11.5704	10.5506	11.9497	11.5024	11.441	10.8188
395	10.8806	10.4118	10.86	11.0503	10.8455	11.4837	8.44025	9.28072	9.81613	9.29183	10.0291	11.8982	11.8932	12.9262	11.5376	10.7583	12.1546	11.7784	11.5361	11.065
396	11.1022	10.6447	11.0641	11.4083	11.2138	11.4925	8.47149	9.60887	10.1705	9.74051	10.5037	12.1882	11.8168	12.9857	11.4579	10.943	12.3117	12.0183	11.5899	11.2855
397	11.2965	10.8578	11.24	11.7423	11.562	11.4568	8.503	9.93617	10.5188	10.1955	10.9771	12.4351	11.6861	12.9706	11.3313	11.1006	12.4149	12.2151	11.5995	11.4753
398	11.4585	11.0468	11.3833	12.0446	11.8828	11.3757	8.53452	10.2587	10.8559	10.6518	11.4422	12.631	11.502	12.8774	11.1587	11.2272	12.4589	12.3623	11.5627	11.6292
399	11.5838	11.2074	11.49	12.3075	12.1686	11.2492	8.56575	10.5721	11.1762	11.1033	11.8912	12.7683	11.2668	12.7044	10.9424	11.3191	12.4397	12.4539	11.4785	11.7426
400	12.4289	9.45604	11.8665	9.98351	11.3716	10.2005	12.4377	9.96311	13.5101	12.2827	11.8532	9.49653	9.04736	12.3002	11.4907	13.2974	12.6688	13.2174	9.21947	9.49971
401	11.9317	9.02192	11.125	9.52315	10.8546	9.63958	11.8501	9.54696	12.7473	11.6506	11.3333	9.00726	8.85856	11.8839	11.1588	12.6125	12.4177	13.1355	9.51124	9.58986
402	11.383	8.55382	10.3592	9.01521	10.2947	9.03178	11.2066	9.05825	11.9055	10.9567	10.7258	8.50805	8.58328	11.3964	10.7876	11.875	12.1081	12.9951	9.70359	9.61906
403	10.7928	8.06343	9.58312	8.47369	9.70399	8.39344	10.5209	8.51429	11.0058	10.2176	10.0497	8.00744	8.23672	10.8493	10.3831	11.099	11.7434	12.7926	9.8034	9.59235
404	10.1726	7.56171	8.81025	7.91199	9.09447	7.73989	9.80747	7.93197	10.0702	9.45042	9.32435	7.51316	7.83403	10.2552	9.95218	10.2992	11.3288	12.527	9.81777	9.51492
405	9.534	7.05858	8.05272	7.34248	8.47773	7.08498	9.08079	7.32723	9.1203	8.67177	8.56916	7.03199	7.38992	9.62778	9.50218	9.49078	10.8713	12.2	9.75422	9.39221
406	8.88841	6.56271	7.32096	6.77613	7.86444	6.44075	8.35434	6.71447	8.17595	7.8968	7.80209	6.56963	6.91824	8.98045	9.04053	8.68786	10.3791	11.8152	9.62074	9.22986
407	8.24658	6.08144	6.6234	6.22236	7.26404	5.81716	7.64026	6.10629	7.25429	7.13874	7.03922	6.13069	6.43162	8.32609	8.57451	7.90312	9.86109	11.3785	9.42579	9.03368
408	7.61814	5.62071	5.96645	5.68887	6.68451	5.22206	6.94887	5.51321	6.36929	6.40856	6.29423	5.71869	5.94126	7.67641	8.11099	7.14725	9.32655	10.8975	9.1782	8.80953
409	7.01127	5.18511	5.35455	5.18172	6.13228	4.66128	6.28855	4.94366	5.53159	5.71481	5.57818	5.33617	5.45673	7.04163	7.65623	6.42877	8.78461	10.3811	8.88703	8.5633
410	6.43266	4.77799	4.79038	4.70535	5.61225	4.13878	5.66566	4.40401	4.74859	5.06372	4.89946	4.98475	4.98595	6.43029	7.21571	5.754	8.2439	9.83879	8.56137	8.30072
411	5.88743	4.40156	4.27507	4.26276	5.12787	3.65686	5.08464	3.89875	4.02476	4.45934	4.26398	4.66528	4.53516	5.84912	6.79407	5.12718	7.71226	9.28049	8.21013	8.0273
412	5.37922	4.05707	3.80847	3.85569	4.6813	3.21645	4.54824	3.43069	3.36204	3.90384	3.67541	4.37797	4.10908	5.30313	6.39508	4.55067	7.19656	8.71581	7.84183	7.74824
413	4.91033	3.74494	3.38942	3.48478	4.27356	2.81732	4.05769	3.0012	2.76032	3.3978	3.13547	4.12248	3.71098	4.79574	6.02165	4.02526	6.70253	8.15382	7.46441	7.46833
414	4.4819	3.46493	3.016	3.14986	3.90474	2.45837	3.61298	2.61045	2.21789	2.94049	2.64431	3.89808	3.34294	4.32891	5.67589	3.55043	6.23477	7.60265	7.08511	7.19189
415	4.09406	3.21628	2.68574	2.85001	3.57417	2.13783	3.21313	2.25771	1.73185	2.53021	2.20082	3.70374	3.00596	3.9034	5.35918	3.12464	5.79676	7.06935	6.71031	6.92274
416	3.74617	2.99786	2.39583	2.58385	3.28061	1.85346	2.8564	1.9415	1.29846	2.16454	1.80295	3.53823	2.70019	3.51898	5.07229	2.74562	5.39091	6.55974	6.34551	6.66419
417	3.43698	2.80827	2.14324	2.34963	3.02242	1.60272	2.54053	1.65985	0.913491	1.84056	1.44796	3.4002	2.42509	3.17463	4.81544	2.41055	5.01872	6.07841	5.9953	6.419
418	3.16477	2.64596	1.9249	2.14537	2.79766	1.3829	2.26288	1.41043	0.572396	1.55507	1.1327	3.28826	2.17961	2.86873	4.58841	2.11632	4.68086	5.62874	5.66337	6.18946
419	2.92756	2.50929	1.73774	1.96897	2.60425	1.19124	2.02065	1.1907	0.270558	1.30471	0.853722	3.20102	1.96233	2.59926	4.39067	1.85961	4.37734	5.21301	5.35256	5.97737
420	2.72317	2.39661	1.57884	1.81829	2.44002	1.02503	1.81093	0.998045	0.00340628	1.0861	0.607504	3.13715	1.77155	2.36394	4.22141	1.63711	4.10762	4.83255	5.06498	5.78412
421	2.54936	2.3063	1.44539	1.69123	2.30284	0.881622	1.63083	0.829841	-0.233477	0.895932	0.390519	3.09541	1.60546	2.16033	4.07968	1.44555	3.87077	4.48781	4.80201	5.61068
422	2.40388	2.23686	1.3348	1.58578	2.19063	0.758517	1.47758	0.683524	-0.444291	0.73104	0.199338	3.07467	1.46217	1.98597	3.96443	1.28178	3.66555	4.1786	4.56448	5.45775
423	2.28458	2.18687	1.24472	1.50003	2.10144	0.653383	1.34851	0.556645	-0.632968	0.588438	0.0306818	3.07393	1.33978	1.83841	3.87453	1.14286	3.49053	3.90417	4.35273	5.3257
424	2.18939	2.15506	1.17299	1.43223	2.03348	0.564073	1.24117	0.446898	-0.803161	0.46535	-0.118535	3.09234	1.23646	1.71533	3.80891	1.02604	3.34416	3.66336	4.1667	5.21471
425	2.11642	2.14031	1.1177	1.3808	1.98509	0.488629	1.1533	0.352143	-0.958228	0.359229	-0.251182	3.12921	1.15048	1.61451	3.7665	0.928806	3.22489	3.45474	4.00603	5.12475
426	2.06394	2.14164	1.07717	1.34432	1.95482	0.425288	1.08283	0.270416	-1.10125	0.267754	-0.369907	3.184	1.08019	1.53393	3.74633	0.848902	3.13115	3.27671	3.87015	5.05569
427	2.03042	2.15825	1.04995	1.32154	1.94142	0.372474	1.02796	0.199931	-1.23502	0.188836	-0.477132	3.25632	1.02411	1.47173	3.74753	0.784297	3.06147	3.12756	3.75834	5.00729
428	2.01453	2.18951	1.03479	1.31141	1.9438	0.328791	0.987044	0.139078	-1.3621	0.120602	-0.575064	3.34594	0.980884	1.42625	3.76932	0.733202	3.01447	3.00556	3.66977	4.97925
429	2.01511	2.23494	1.03065	1.31303	1.96108	0.293014	0.958695	0.0864146	-1.48482	0.0613846	-0.665704	3.45279	0.94932	1.39606	3.81106	0.694047	2.98889	2.90904	3.6036	4.97122
430	2.03124	2.29421	1.03667	1.32566	1.99257	0.264072	0.941705	0.0406575	-1.60529	0.0097074	-0.750867	3.57693	0.928366	1.37987	3.87225	0.665477	2.98365	2.8364	3.55898	4.98288
431	2.06214	2.36717	1.05216	1.34873	2.03773	0.241041	0.935057	0.00066918	-1.72548	-0.0357326	-0.832199	3.71856	0.917118	1.37664	3.9525	0.646331	2.99778	2.78616	3.53511	5.0139
432	2.10726	2.45379	1.07661	1.38181	2.09623	0.223126	0.937912	-0.0345543	-1.84719	-0.0760822	-0.911196	3.87801	0.914813	1.38549	4.05157	0.635631	3.03052	2.75698	3.53124	5.06396
433	2.16622	2.5542	1.10965	1.42463	2.16788	0.209649	0.949597	-0.0658969	-1.97208	-0.112349	-0.989226	4.05573	0.920826	1.4057	4.16934	0.632564	3.08125	2.74769	3.54673	5.1328
434	2.2388	2.66868	1.15104	1.47704	2.25265	0.200038	0.96959	-0.0941356	-2.10175	-0.145418	-1.06755	4.25229	0.934656	1.43675	4.30582	0.636471	3.14953	2.75728	3.58104	5.22019
435	2.32494	2.79764	1.20069	1.53903	2.35067	0.193815	0.997513	-0.119954	-2.23769	-0.176068	-1.14732	4.46832	0.955928	1.47827	4.4611	0.646828	3.23506	2.78491	3.63371	5.32594
436	2.42476	2.9416	1.25863	1.6107	2.46222	0.190586	1.03312	-0.143953	-2.38137	-0.204986	-1.22965	4.70455	0.984379	1.53003	4.63542	0.663241	3.33774	2.82992	3.70444	5.44989
437	2.53851	3.10123	1.32499	1.69229	2.58772	0.190029	1.07628	-0.166666	-2.53421	-0.232783	-1.31559	4.96175	1.01985	1.59194	4.82905	0.685426	3.45759	2.89183	3.79302	5.59192
438	2.6666	3.27731	1.40002	1.78414	2.7277	0.191888	1.12699	-0.188564	-2.6976	-0.260003	-1.40613	5.24075	1.0623	1.66408	5.04238	0.713209	3.59479	2.97033	3.89938	5.75194
439	2.80956	3.47075	1.4841	1.8867	2.88286	0.195964	1.18535	-0.21007	-2.87297	-0.287139	-1.50226	5.54233	1.11176	1.74662	5.27582	0.746511	3.74964	3.06525	4.02356	5.92986
440	2.54167	0.951306	0.845842	1.77324	2.66912	2.55398	2.31933	0.514194	2.76489	0.0117277	2.24294	1.76369	2.03911	3.40471	4.61073	1.41195	1.51823	3.89582	2.94662	2.50894
441	2.40422	0.888667	0.823993	2.10015	2.31105	2.65472	2.09705	0.435637	2.56024	0.145787	2.1445	1.66387	2.31055	3.57325	4.3824	1.6533	1.75438	4.02331	3.14421	2.44667
442	2.32015	0.847639	0.81539	2.40923	2.03147	2.77544	1.92934	0.372591	2.41507	0.265254	2.08477	1.59815	2.5757	3.76723	4.23462	1.88698	1.98657	4.17864	3.35971	2.42601
443	2.2822	0.825147	0.818604	2.70653	1.81731	2.91599	1.80809	0.322459	2.32099	0.373557	2.05906	1.56206	2.83914	3.98674	4.15706	2.11756	2.21914	4.36106	3.59451	2.44225
444	2.28466	0.818754	0.832517	2.99741	1.65787	3.07647	1.72664	0.283087	2.27117	0.473639	2.06356	1.55201	3.10495	4.23218	4.14129	2.34914	2.45598	4.57013	3.85005	2.49174
445	2.32307	0.826564	0.856283	3.28663	1.5444	3.25726	1.67955	0.252697	2.26014	0.568039	2.09531	1.56516	3.3768	4.50417	4.18052	2.58539	2.70064	4.80571	4.12787	2.57172
446	2.39408	0.847137	0.889296	3.57844	1.46984	3.45895	1.66248	0.229829	2.2836	0.658968	2.15202	1.5993	3.65807	4.80354	4.2694	2.82967	2.95639	5.06788	4.4296	2.6802
447	2.49524	0.879421	0.931161	3.87666	1.42856	3.68234	1.67197	0.213288	2.33821	0.748371	2.23202	1.65281	3.95184	5.13124	4.40373	3.08509	3.2263	5.35689	4.75689	2.81587
448	2.62493	0.922697	0.981671	4.18471	1.41608	3.92842	1.70535	0.202107	2.42151	0.837979	2.33417	1.72452	4.26096	5.48833	4.58036	3.35459	3.51329	5.67309	5.11143	2.97796
449	2.78216	0.976532	1.04079	4.50574	1.42893	4.19834	1.76062	0.195508	2.53176	0.929358	2.45779	1.81371	4.5881	5.87588	4.79697	3.64095	3.82018	6.01689	5.49488	3.16624
450	2.96654	1.04074	1.10863	4.84257	1.46448	4.49335	1.83636	0.19287	2.66784	1.02395	2.60261	1.92003	4.93573	6.29489	5.05196	3.94684	4.14969	6.38867	5.90885	3.38088
451	3.1782	1.11537	1.18546	5.19776	1.52079	4.81483	1.93165	0.193711	2.8292	1.12312	2.76873	2.04346	5.30613	6.74624	5.34428	4.27486	4.50451	6.78871	6.35478	3.62245
452	3.41769	1.20065	1.27166	5.57362	1.59655	5.16422	2.046	0.19766	3.01574	1.22815	2.95658	2.18427	5.70142	7.23054	5.67333	4.62752	4.88722	7.21707	6.8339	3.89184
453	3.68594	1.29701	1.36777	5.97217	1.69093	5.54297	2.17931	0.204442	3.22778	1.34034	3.16687	2.34301	6.12344	7.74797	6.03879	5.00727	5.30036	7.67348	7.3471	4.19022
454	3.98421	1.40505	1.47444	6.39514	1.80357	5.95247	2.33182	0.213865	3.46603	1.46094	3.40058	2.52047	6.57378	8.2982	6.44054	5.41644	5.74632	8.15726	7.89476	4.51898
455	4.31405	1.52552	1.59243	6.84389	1.93449	6.39402	2.50409	0.225809	3.73148	1.59125	3.65892	2.71768	7.05366	8.88009	6.8785	5.85725	6.22733	8.6671	8.47658	4.87973
456	4.67723	1.65936	1.72266	7.31935	2.08407	6.86867	2.69695	0.240215	4.02543	1.7326	3.94331	2.9359	7.56385	9.49153	7.35249	6.33169	6.74533	9.20092	9.0914	5.27416
457	5.07569	1.80764	1.86615	7.82191	2.253	7.37717	2.91148	0.25708	4.3494	1.88639	4.25535	3.17657	8.10449	10.1292	7.86201	6.84148	7.3019	9.75569	9.73688	5.70403
458	5.51147	1.97161	2.02406	8.3513	2.44224	7.91977	3.14901	0.276449	4.70511	2.05408	4.59678	3.44133	8.67499	10.7881	8.40612	7.38794	7.89804	10.3272	10.4092	6.17107
459	5.98663	2.15269	2.19769	8.90644	2.65304	8.49606	3.41111	0.298412	5.0944	2.23725	4.96946	3.73202	9.27378	11.4615	8.98318	7.97178	8.53401	10.9099	11.1029	6.67686
460	6.50314	2.35245	2.38849	9.48522	2.88689	9.10474	3.69951	0.323104	5.51919	2.43755	5.3753	4.05062	9.8981	12.1405	9.5906	8.59299	9.20902	11.4967	11.8103	7.22273
461	7.06272	2.57264	2.59805	10.0843	3.14552	9.74341	4.01616	0.3507	5.98141	2.65678	5.81621	4.39925	10.5437	12.8137	10.2246	9.25051	9.92095	12.0786	12.5211	7.80951
462	7.66671	2.81522	2.82809	10.6991	3.43089	10.4082	4.36316	0.381415	6.48288	2.89686	6.29399	4.78016	11.2047	13.4674	10.8798	9.94195	10.6659	12.6451	13.2227	8.4374
463	8.31581	3.08228	3.08052	11.323	3.74518	11.0935	4.74274	0.415505	7.02517	3.15984	6.81025	5.19566	11.873	14.085	11.549	10.6633	11.438	13.1834	13.8992	9.10566
464	9.00977	3.37614	3.35739	11.9477	4.09072	11.7917	5.1572	0.453269	7.60948	3.44792	7.36628	5.64806	12.5384	14.6476	12.223	11.4084	12.2285	13.6795	14.5321	9.81227
465	9.74711	3.69928	3.66091	12.563	4.47006	12.4927	5.60887	0.495048	8.23638	3.76345	7.96281	6.1396	13.1882	15.1343	12.8901	12.1686	13.0258	14.1176	15.1	10.5536
466	10.5247	4.05435	3.99343	13.1562	4.88585	13.1838	6.10004	0.541231	8.90559	4.1089	8.59987	6.67237	13.8071	15.5233	13.536	12.9326	13.8147	14.4811	15.5799	11.324
467	11.337	4.44417	4.35743	13.7127	5.34084	13.8495	6.63283	0.592254	9.61564	4.48686	9.27644	7.24812	14.3776	15.7926	14.1439	13.6856	14.5761	14.7535	15.9477	12.1151
468	12.1761	4.87168	4.75551	14.2161	5.83776	14.4715	7.20906	0.648609	10.3635	4.90002	9.99016	7.86809	14.8799	15.9221	14.6948	14.4094	15.2874	14.9191	16.1799	12.9157
469	13.0306	5.33989	5.19034	14.6484	6.37927	15.029	7.83005	0.710844	11.1441	5.35111	10.7369	8.5328	15.2932	15.8948	15.1678	15.0826	15.9223	14.9639	16.2552	13.7111
470	13.8851	5.85181	5.66456	14.9909	6.9678	15.4994	8.49639	0.779572	11.95	5.84285	11.5105	9.2417	15.5962	15.6993	15.5408	15.6804	16.452	14.8777	16.1573	14.4828
471	14.7201	6.41037	6.18079	15.2254	7.60536	15.8592	9.20768	0.855475	12.7706	6.37782	12.3019	9.99287	15.7688	15.3307	15.7924	16.1762	16.8463	14.6542	15.8758	15.2084
472	15.5115	7.01824	6.74142	15.3351	8.2933	16.0855	9.96207	0.939311	13.5917	6.95838	13.0992	10.7825	15.7934	14.792	15.9028	16.5421	17.0759	14.2926	15.409	15.8619
473	16.2307	7.67766	7.3485	15.3063	9.032	16.1578	10.7559	1.03192	14.3955	7.58645	13.8867	11.6044	15.6573	14.0946	15.8557	16.7515	17.115	13.7978	14.7637	16.4146
474	16.8455	8.39016	8.00353	15.1296	9.82048	16.0602	11.5831	1.13424	15.1599	8.26331	14.6452	12.4495	15.3535	13.2573	15.6405	16.7809	16.9439	13.1804	13.956	16.8361
475	17.3216	9.15623	8.70718	14.8013	10.6559	15.7828	12.4348	1.2473	15.8586	8.98928	15.3515	13.3053	14.8825	12.3049	15.2531	16.6128	16.5521	12.4561	13.0097	17.0963
476	17.6243	9.97489	9.45893	14.3241	11.5329	15.3238	13.2984	1.37226	16.4623	9.76335	15.9791	14.1552	14.2525	11.2667	14.6977	16.238	15.9402	11.6445	11.9547	17.1684
477	17.7221	10.8431	10.2567	13.7074	12.4431	14.6901	14.1574	1.51038	16.9392	10.5827	16.4988	14.9781	13.4794	10.1731	13.9864	15.6572	15.1206	10.7678	10.8236	17.0313
478	17.5897	11.7553	11.0962	12.9666	13.3742	13.8973	14.9907	1.66306	17.2574	11.4421	16.8805	15.7484	12.5853	9.05411	13.1385	14.8822	14.1173	9.84928	9.65004	16.6725
479	17.2118	12.7022	11.9705	12.1225	14.3094	12.9684	15.7726	1.83186	17.387	12.3335	17.0949	16.4365	11.5971	7.93718	12.1795	13.9348	12.9639	8.91138	8.46539	16.0907
480	14.803	14.8746	14.5562	13.6831	12.8352	14.0466	12.3668	14.8745	15.2165	14.2606	14.1253	16.1768	16.2308	13.955	15.3878	14.0688	12.3079	14.8309	12.3676	15.7658
481	17.8258	17.8453	17.2758	16.6498	15.8962	17.0112	15.5421	17.8062	17.9617	17.2723	17.23	19.1333	18.9518	17.0401	18.0657	17.0262	15.4311	15.9137	13.4555	16.5402
482	20.923	20.8613	20.0866	19.6452	18.9529	20.0051	18.684	20.7283	20.7548	20.2971	20.282	22.098	21.7289	20.07	20.7499	20.0404	18.5451	16.9194	14.4835	17.3167
483	24.0504	23.8747	22.9466	22.6449	21.9967	22.9966	21.7932	23.589	23.5391	23.2982	23.2437	24.9926	24.4844	23.0102	23.3784	23.0809	21.6531	17.8094	15.4326	18.0476
484	27.0905	26.7674	25.7544	25.5596	24.9547	25.8878	24.8034	26.2712	26.1964	26.1708	26.0085	27.6663	27.077	25.7588	25.8322	26.0504	24.6929	18.5385	16.2773	18.6816
485	29.8382	29.3399	28.3375	28.224	27.6786	28.5038	27.5714	28.5849	28.5391	28.7314	28.3945	29.8894	29.2934	28.1402	27.9303	28.772	27.5258	19.0578	16.9865	19.165
486	31.9944	31.309	30.4452	30.3913	29.9384	30.5886	29.871	30.271	30.3096	30.7164	30.1476	31.3614	30.8535	29.9082	29.4344	30.982	29.9279	19.3193	17.5259	19.445
487	33.1837	32.3287	31.7602	31.7445	31.4316	31.8196	31.4009	31.026	31.2014	31.8004	30.9666	31.7478	31.4381	30.769	30.0734	32.3423	31.596	19.2809	17.8602	19.4739
488	33.0129	32.0471	31.9397	31.9395	31.82	31.8547	31.8229	30.558	30.9101	31.648	30.558	30.7528	30.7507	30.4336	29.5922	32.486	32.1803	18.9135	17.9574	19.2142
489	31.1779	30.2045	30.6946	30.6859	30.805	30.4176	30.8359	28.6713	29.215	30.0038	28.7214	28.2201	28.6079	28.7	27.8244	31.1063	31.3573	18.206	17.7927	18.644
490	27.594	26.746	27.8941	27.8539	28.2306	27.4046	28.2804	25.355	26.0714	26.797	25.4397	24.2224	25.0277	25.5406	24.7646	28.073	28.9358	17.1699	17.3529	17.7617
491	22.4827	21.8894	23.6495	23.5605	24.1745	22.964	24.231	20.8267	21.6644	22.2116	20.926	19.0803	20.265	21.1512	20.603	23.5242	24.9598	15.8392	16.6392	16.5875
492	16.3383	16.0888	18.3191	18.1727	18.9667	17.4866	19.0169	15.4901	16.3801	16.6613	15.5835	13.2782	14.7535	15.9179	15.69	17.865	19.7416	14.2677	15.6694	15.162
493	9.76657	9.89233	12.4068	12.2037	13.1014	11.4912	13.1347	9.81632	10.6928	10.6655	9.88753	7.31403	8.97435	10.3051	10.4391	11.6465	13.7834	12.5223	14.4765	13.5417
494	3.29234	3.77646	6.40564	6.15295	7.08344	5.46516	7.09333	4.21369	5.02909	4.69356	4.25323	1.57206	3.32651	4.72654	5.21825	5.39015	7.61744	10.6749	13.1055	11.7918
495	-2.74778	-1.94617	0.679021	0.385968	1.29901	-0.245839	1.28345	-1.04392	-0.315461	-0.933024	-1.03932	-3.7206	-1.93527	-0.532481	0.284934	-0.535364	1.66148	8.79431	11.6093	9.97876
496	-8.19467	-7.12131	-4.56899	-4.8933	-4.02579	-5.45507	-4.06585	-5.8144	-5.18289	-6.04618	-5.8435	-8.46232	-6.68653	-5.31874	-4.21873	-5.93422	-3.83546	6.93999	10.0424	8.16327
497	-12.9917	-11.6914	-9.25264	-9.59929	-8.79079	-10.0866	-8.85259	-10.041	-9.50913	-10.5794	-10.0998	-12.6162	-10.8811	-9.56851	-8.23213	-10.729	-8.76161	5.15883	8.45614	6.39585
498	-17.107	-15.6289	-13.3414	-13.7002	-12.959	-14.1112	-13.0387	-13.7003	-13.2702	-14.5051	-13.7829	-16.1563	-14.4979	-13.256	-11.7335	-14.8894	-13.0759	3.48406	6.89495	4.71463
499	-20.4813	-18.8904	-16.8083	-17.1655	-16.5025	-17.4962	-16.5949	-16.7642	-16.441	-17.7884	-16.8629	-19.0352	-17.5053	-16.3543	-14.7062	-18.3771	-16.7486	1.93634	5.39406	3.14539
500	-23.0071	-21.3948	-19.6	-19.9367	-19.3695	-20.1796	-19.468	-19.1805	-18.9733	-20.3634	-19.2858	-21.1724	-19.8435	-18.8151	-17.1195	-21.1178	-19.7246	0.525884	3.97896	1.70297
501	-24.5352	-23.0265	-21.6288	-21.92	-21.4742	-22.0643	-21.5702	-20.8714	-20.7915	-22.1314	-20.9717	-22.4625	-21.4264	-20.5646	-18.9228	-22.9978	-21.9113	-0.745068	2.66603	0.393365
502	-24.9093	-23.658	-22.7837	-22.9999	-22.7062	-23.0347	-22.7893	-21.7468	-21.8038	-22.9785	-21.8285	-22.8007	-22.1579	-21.5159	-20.052	-23.8828	-23.1886	-1.87985	1.46387	-0.783977
503	-24.0204	-23.1912	-22.9592	-23.0697	-22.9582	-22.988	-23.0168	-21.7295	-21.9268	-22.8083	-21.7788	-22.1192	-21.9608	-21.5924	-20.4448	-23.6578	-23.438	-2.88538	0.374889	-1.8341
504	-21.8669	-21.604	-22.0943	-22.073	-22.165	-21.8765	-22.188	-20.7879	-21.1179	-21.5838	-20.7922	-20.4261	-20.8112	-20.7586	-20.0629	-22.2761	-22.5865	-3.77061	-0.603074	-2.76487
505	-18.5932	-18.986	-20.2113	-20.0433	-20.3427	-19.745	-20.3216	-18.9626	-19.4046	-19.3624	-18.9133	-17.8286	-18.7659	-19.0476	-18.9133	-19.8023	-20.6499	-4.54544	-1.47532	-3.58565
506	-14.4796	-15.5418	-17.436	-17.1218	-17.6113	-16.746	-17.5422	-16.3781	-16.8998	-16.3065	-16.2719	-14.5277	-15.9699	-16.5737	-17.0632	-16.4244	-17.7578	-5.21989	-2.24917	-4.30642
507	-9.88311	-11.5559	-13.9869	-13.5427	-14.186	-13.1206	-14.0703	-13.2293	-13.7915	-12.6613	-13.0689	-10.7827	-12.6373	-13.5217	-14.6389	-12.4256	-14.144	-5.80368	-2.933	-4.93713
508	-5.15425	-7.33184	-10.1344	-9.58713	-10.3374	-9.15048	-10.1809	-9.74662	-10.3109	-8.7056	-9.53929	-6.85925	-9.01105	-10.1153	-11.8092	-8.12267	-10.1004	-6.30592	-3.53567	-5.48728
509	-0.573903	-3.13466	-6.14604	-5.52684	-6.33648	-5.10239	-6.14777	-6.15448	-6.6887	-4.69802	-5.91019	-2.98445	-5.31928	-6.57663	-8.75811	-3.80227	-5.91657	-6.73499	-4.06604	-5.96576
510	3.6685	0.839862	-2.24381	-1.58185	-2.41053	-1.18872	-2.19862	-2.63914	-3.12063	-0.84128	-2.36833	0.675209	-1.7447	-3.09337	-5.6565	0.318438	-1.83116	-7.09848	-4.53261	-6.38064
511	7.4606	4.46644	1.41435	2.09467	1.27744	2.44486	1.50422	0.665033	0.249666	2.72734	0.952721	4.01303	1.58546	0.196425	-2.64297	4.09784	1.98792	-7.40322	-4.94342	-6.73923
512	10.7373	7.67239	4.72977	5.40878	4.62475	5.70995	4.85913	3.6724	3.32935	5.92519	3.96845	6.96708	4.59273	3.20322	0.183064	7.45306	5.43694	-7.65536	-5.30588	-7.04801
513	13.453	10.4151	7.64599	8.30688	7.57229	8.55622	7.80768	6.33362	6.06445	8.70532	6.63034	9.50205	7.23281	5.87471	2.75816	10.3359	8.45644	-7.86038	-5.62673	-7.31275
514	15.5645	12.6644	10.1303	10.7568	10.0857	10.953	10.3155	8.62158	8.42527	11.0388	8.91147	11.5947	9.48087	8.1822	5.04622	12.7125	11.0103	-8.02323	-5.91204	-7.53852
515	17.0262	14.3922	12.1596	12.7342	12.1409	12.8767	12.3581	10.5202	10.3944	12.9031	10.7953	13.2257	11.3208	10.1093	7.02895	14.5521	13.071	-8.14837	-6.16724	-7.72977
516	17.7957	15.5714	13.7136	14.2168	13.7169	14.3051	13.9133	12.0178	11.9593	14.2772	12.2696	14.3772	12.7396	11.6447	8.69811	15.8235	14.6122	-8.23988	-6.39708	-7.89042
517	17.8471	16.1801	14.7733	15.1841	14.794	15.2186	14.961	13.105	13.1098	15.1427	13.3241	15.0355	13.7263	12.7798	10.0505	16.5006	15.6094	-8.3015	-6.60577	-8.02391
518	17.1863	16.2101	15.3252	15.6225	15.3581	15.605	15.4866	13.7759	13.8384	15.4893	13.9527	15.197	14.2746	13.5088	11.0854	16.5708	16.0456	-8.33665	-6.79693	-8.13328
519	15.8631	15.6764	15.3676	15.5329	15.407	15.467	15.4887	14.0315	14.1446	15.3217	14.1569	14.8741	14.3868	13.8324	11.8047	16.0457	15.9198	-8.34857	-6.97368	-8.22121
520	-6.57464	-8.03755	-5.84471	-4.30753	-8.03911	-6.51539	-5.38484	-7.23406	-6.92822	-8.58553	-7.81234	-7.39621	-6.9454	-5.32621	-7.03301	-7.85525	-10.3325	-6.11162	-5.41878	-7.84333
521	-7.10118	-8.41149	-6.48434	-4.94336	-8.40494	-7.04918	-5.87946	-7.66619	-7.38051	-8.75651	-8.05532	-7.59341	-7.44393	-5.90738	-7.63316	-8.08622	-10.338	-6.65808	-6.01425	-8.35319
522	-7.57039	-8.74061	-7.0855	-5.52436	-8.7648	-7.56057	-6.33695	-8.07577	-7.80447	-8.92234	-8.27965	-7.77659	-7.88299	-6.43267	-8.19049	-8.28718	-10.3446	-7.14118	-6.54388	-8.81201
523	-7.98819	-9.02787	-7.65498	-6.05961	-9.1181	-8.05356	-6.76345	-8.46517	-8.20346	-9.08205	-8.48677	-7.94748	-8.26811	-6.9096	-8.70953	-8.46079	-10.3486	-7.56776	-7.01552	-9.22311
524	-8.35936	-9.27549	-8.19782	-6.55677	-9.46352	-8.53082	-7.16397	-8.83578	-8.57978	-9.23449	-8.67765	-8.10745	-8.60378	-7.34444	-9.19315	-8.60927	-10.3467	-7.94357	-7.43582	-9.58865
525	-8.68765	-9.48513	-8.71738	-7.02217	-9.79906	-8.99368	-7.54251	-9.18806	-8.93477	-9.3784	-8.85292	-8.25752	-8.89359	-7.7423	-9.64273	-8.73448	-10.3359	-8.27336	-7.81033	-9.90976
526	-8.97594	-9.65801	-9.21547	-7.46086	-10.122	-9.44223	-7.90213	-9.52164	-9.26889	-9.51237	-9.01286	-8.39841	-9.1404	-8.10719	-10.0583	-8.83801	-10.3139	-8.56101	-8.14361	-10.1868
527	-9.2264	-9.79507	-9.6924	-7.8767	-10.4292	-9.87539	-8.24496	-9.83541	-9.58182	-9.63495	-9.15748	-8.53058	-9.34647	-8.44216	-10.4388	-8.92121	-10.2788	-8.80964	-8.43931	-10.4195
528	-9.44059	-9.89707	-10.1471	-8.27247	-10.7168	-10.2909	-8.57237	-10.1276	-9.87255	-9.74462	-9.28659	-8.65426	-9.51363	-8.74938	-10.782	-8.98527	-10.229	-9.02174	-8.70034	-10.6073
529	-9.61963	-9.96475	-10.5772	-8.64994	-10.9806	-10.6856	-8.88495	-10.3958	-10.1395	-9.83989	-9.39987	-8.76949	-9.6434	-9.03026	-11.085	-9.03128	-10.1636	-9.19935	-8.92894	-10.7495
530	-9.76433	-9.99891	-10.9792	-9.00991	-11.216	-11.0553	-9.18261	-10.6374	-10.3806	-9.91933	-9.49688	-8.87616	-9.73711	-9.28557	-11.3445	-9.06024	-10.082	-9.34409	-9.12681	-10.8453
531	-9.87531	-10.0005	-11.3487	-9.35235	-11.4184	-11.3948	-9.46466	-10.8492	-10.5934	-9.9816	-9.57713	-8.97403	-9.79605	-9.5155	-11.5567	-9.07312	-9.98425	-9.45735	-9.29524	-10.8943
532	-9.95314	-9.97071	-11.6801	-9.67644	-11.583	-11.6986	-9.72985	-11.0281	-10.7753	-10.0255	-9.64014	-9.06276	-9.82153	-9.71983	-11.7178	-9.0709	-9.87054	-9.54033	-9.43518	-10.8964
533	-9.99841	-9.91099	-11.9677	-9.98064	-11.7055	-11.9607	-9.97645	-11.1707	-10.9236	-10.05	-9.68551	-9.14193	-9.81501	-9.89799	-11.8243	-9.05456	-9.74166	-9.59419	-9.54737	-10.8522
534	-10.0118	-9.82314	-12.2052	-10.2628	-11.7819	-12.1747	-10.2024	-11.2742	-11.0358	-10.0545	-9.71289	-9.21111	-9.77811	-10.0492	-11.8733	-9.02511	-9.59871	-9.62008	-9.63244	-10.7628
535	-9.9944	-9.70925	-12.3865	-10.5204	-11.8087	-12.3347	-10.4052	-11.3358	-11.1095	-10.0383	-9.72212	-9.26982	-9.71268	-10.1725	-11.8628	-8.98364	-9.4431	-9.61922	-9.69094	-10.6303
536	-9.94728	-9.57171	-12.5057	-10.7503	-11.7836	-12.4351	-10.5824	-11.3534	-11.1429	-10.0014	-9.71316	-9.31763	-9.62082	-10.267	-11.7919	-8.93125	-9.27654	-9.59297	-9.72349	-10.4573
537	-9.87199	-9.41322	-12.558	-10.9493	-11.7053	-12.4713	-10.7313	-11.3256	-11.1345	-9.94389	-9.68621	-9.35414	-9.50489	-10.332	-11.6607	-8.86912	-9.10093	-9.54282	-9.73079	-10.2473
538	-9.77037	-9.23668	-12.5396	-11.114	-11.5736	-12.4397	-10.8493	-11.2519	-11.0837	-9.86628	-9.64166	-9.379	-9.36747	-10.3666	-11.4711	-8.79846	-8.91833	-9.47048	-9.71368	-10.0043
539	-9.64458	-9.04517	-12.4483	-11.2413	-11.3896	-12.3386	-10.9341	-11.1326	-10.9907	-9.76943	-9.58015	-9.39198	-9.21134	-10.3708	-11.2261	-8.72053	-8.7309	-9.3778	-9.67319	-9.73303
540	-9.49707	-8.8419	-12.2839	-11.3282	-11.1559	-12.1677	-10.9835	-10.9692	-10.8565	-9.65452	-9.50252	-9.39292	-9.03944	-10.3443	-10.9304	-8.63661	-8.54084	-9.26683	-9.61058	-9.43848
541	-9.33053	-8.63008	-12.0479	-11.3721	-10.8763	-11.9289	-10.9959	-10.764	-10.6829	-9.52302	-9.40987	-9.38181	-8.85482	-10.2878	-10.5896	-8.548	-8.35032	-9.13979	-9.52731	-9.12595
542	-9.14788	-8.41292	-11.7441	-11.3711	-10.5558	-11.626	-10.9702	-10.5204	-10.4726	-9.3767	-9.30349	-9.35875	-8.66057	-10.202	-10.2105	-8.456	-8.1615	-8.99901	-9.42507	-8.80079
543	-8.95218	-8.19351	-11.3783	-11.3241	-10.2	-11.2645	-10.9062	-10.2425	-10.2293	-9.21754	-9.18487	-9.32401	-8.45975	-10.0883	-9.80051	-8.3619	-7.97638	-8.84691	-9.30575	-8.46831
544	-8.74656	-7.97482	-10.9577	-11.231	-9.81573	-10.8516	-10.8042	-9.93528	-9.95691	-9.04773	-9.05563	-9.27798	-8.25536	-9.9485	-9.36754	-8.26695	-7.79686	-8.68597	-9.17144	-8.13358
545	-8.53417	-7.75959	-10.4913	-11.0924	-9.40982	-10.3958	-10.6652	-9.6041	-9.66026	-8.86954	-8.91756	-9.22122	-8.05029	-9.7849	-8.91951	-8.17238	-7.62468	-8.5187	-9.02437	-7.8013
546	-8.31808	-7.55034	-9.98887	-10.9102	-8.98943	-9.90645	-10.4913	-9.25469	-9.34438	-8.68536	-8.7725	-9.15441	-7.84722	-9.60011	-8.46418	-8.07935	-7.46142	-8.34753	-8.86685	-7.4758
547	-8.10126	-7.34934	-9.46053	-10.6871	-8.56158	-9.39319	-10.285	-8.89286	-9.01449	-8.49757	-8.62238	-9.07838	-7.64865	-9.39708	-8.00882	-7.98897	-7.30844	-8.17487	-8.7013	-7.16085
548	-7.88652	-7.15857	-8.91659	-10.427	-8.13291	-8.8658	-10.0497	-8.52438	-8.67585	-8.30853	-8.46911	-8.99407	-7.45686	-9.17901	-7.56007	-7.90226	-7.16694	-8.00298	-8.53012	-6.85974
549	-7.67645	-6.97976	-8.3669	-10.1343	-7.70955	-8.33359	-9.78922	-8.15475	-8.33357	-8.12051	-8.3146	-8.90253	-7.27386	-8.94927	-7.12374	-7.82018	-7.03794	-7.83399	-8.35571	-6.57518
550	-7.4734	-6.81434	-7.82052	-9.81414	-7.29695	-7.80516	-9.5079	-7.78908	-7.99247	-7.93568	-8.16071	-8.8049	-7.1014	-8.71127	-6.70479	-7.7436	-6.92228	-7.66989	-8.18039	-6.30938
551	-7.27948	-6.66351	-7.28553	-9.47218	-6.8998	-7.28812	-9.21032	-7.43197	-7.657	-7.75604	-8.00921	-8.70238	-6.94101	-8.46843	-6.30724	-7.67329	-6.82062	-7.51245	-8.00636	-6.06404
552	-7.0965	-6.52821	-6.76879	-9.11426	-6.522	-6.789	-8.90119	-7.08747	-7.33115	-7.58344	-7.86175	-8.59621	-6.79394	-8.22406	-5.93425	-7.60994	-6.7335	-7.3633	-7.83572	-5.8404
553	-6.92605	-6.40918	-6.27592	-8.74626	-6.16665	-6.31312	-8.58522	-6.75899	-7.01836	-7.41953	-7.71989	-8.48768	-6.66122	-7.98131	-5.5881	-7.55417	-6.6613	-7.22383	-7.67038	-5.63931
554	-6.76942	-6.30695	-5.81129	-8.37388	-5.83611	-5.86463	-8.26699	-6.44934	-6.72156	-7.26575	-7.58502	-8.37805	-6.54368	-7.74311	-5.27036	-7.50648	-6.60428	-7.09526	-7.51209	-5.46126
555	-6.62768	-6.22189	-5.37805	-8.00254	-5.53202	-5.44656	-7.95081	-6.16075	-6.44315	-7.12338	-7.45841	-8.26859	-6.44194	-7.51213	-4.98191	-7.4673	-6.5626	-6.97861	-7.36241	-5.30647
556	-6.50166	-6.15422	-4.97829	-7.6372	-5.25542	-5.06093	-7.64062	-5.89486	-6.18498	-6.99347	-7.34117	-8.16052	-6.35646	-7.29075	-4.72307	-7.43698	-6.53635	-6.87475	-7.22269	-5.17491
557	-6.39199	-6.10405	-4.61314	-7.28226	-5.00685	-4.70884	-7.33999	-5.65284	-5.94848	-6.87691	-7.23425	-8.05501	-6.28754	-7.08103	-4.49372	-7.4158	-6.5255	-6.78434	-7.09413	-5.06638
558	-6.29915	-6.0714	-4.28294	-6.94154	-4.78637	-4.39067	-7.052	-5.4354	-5.7346	-6.7744	-7.13848	-7.95317	-6.23537	-6.88475	-4.29337	-7.40394	-6.52998	-6.70794	-6.9777	-4.98053
559	-6.22342	-6.05618	-3.98737	-6.61824	-4.59372	-4.10617	-6.77928	-5.24289	-5.54396	-6.68649	-7.05452	-7.85605	-6.20003	-6.70338	-4.12127	-7.40152	-6.54967	-6.64593	-6.87423	-4.91694
560	-8.15816	-6.79916	-8.16169	-5.87732	-8.59938	-7.14053	-10.4221	-7.47696	-8.3379	-9.43008	-8.69405	-4.74239	-7.21417	-5.40258	-6.77476	-5.51453	-6.45034	-5.20344	-7.65331	-6.97389
561	-8.0833	-6.75279	-8.17719	-6.06406	-8.62737	-7.08484	-10.2905	-7.80785	-8.35008	-9.28837	-8.54817	-5.08815	-7.08827	-5.57712	-6.78061	-5.48435	-6.39933	-5.54376	-7.76343	-7.1349
562	-8.04148	-6.73253	-8.21787	-6.22396	-8.64728	-7.04221	-10.2054	-8.11789	-8.38605	-9.1773	-8.47109	-5.40383	-6.98456	-5.752	-6.79504	-5.46917	-6.36669	-5.85508	-7.86629	-7.28342
563	-8.02911	-6.73677	-8.28064	-6.36154	-8.65974	-7.01272	-10.1581	-8.40894	-8.44268	-9.09254	-8.45374	-5.69477	-6.90229	-5.92914	-6.8186	-5.46933	-6.35213	-6.14241	-7.963	-7.42168
564	-8.04298	-6.76402	-8.36262	-6.48086	-8.66534	-6.99642	-10.1408	-8.68222	-8.51707	-9.0303	-8.48822	-5.96564	-6.84072	-6.11016	-6.85173	-5.48508	-6.3553	-6.41008	-8.05446	-7.55152
565	-8.08017	-6.81292	-8.46114	-6.58552	-8.66465	-6.99325	-10.1469	-8.93832	-8.60654	-8.98723	-8.56752	-6.22051	-6.79913	-6.29641	-6.89475	-5.51659	-6.37584	-6.66179	-8.14138	-7.67448
566	-8.13801	-6.8822	-8.57368	-6.67868	-8.6582	-7.00312	-10.17	-9.17731	-8.70854	-8.96035	-8.68543	-6.46285	-6.77681	-6.48899	-6.94786	-5.56398	-6.41338	-6.90065	-8.22427	-7.7918
567	-8.21402	-6.97067	-8.69778	-6.76314	-8.64651	-7.02589	-10.2046	-9.39881	-8.8206	-8.94701	-8.83627	-6.69558	-6.77308	-6.68875	-7.01117	-5.6273	-6.46753	-7.12923	-8.30349	-7.90443
568	-8.3059	-7.07722	-8.83107	-6.84135	-8.63012	-7.06134	-10.2459	-9.60205	-8.94037	-8.94484	-9.01482	-6.92114	-6.78725	-6.89631	-7.08471	-5.70659	-6.53789	-7.3496	-8.37928	-8.01313
569	-8.41143	-7.20075	-8.97119	-6.91542	-8.60953	-7.10923	-10.2891	-9.78595	-9.06551	-8.95172	-9.21613	-7.14148	-6.81866	-7.11203	-7.16838	-5.80183	-6.62402	-7.56338	-8.45174	-8.11842
570	-8.52849	-7.34018	-9.11579	-6.98716	-8.58526	-7.16925	-10.3302	-9.94924	-9.19371	-8.96569	-9.43544	-7.35813	-6.86666	-7.33605	-7.26204	-5.91301	-6.7255	-7.77174	-8.52087	-8.22063
571	-8.65499	-7.49444	-9.26251	-7.05814	-8.55783	-7.24106	-10.3657	-10.0905	-9.32269	-8.98501	-9.66803	-7.57222	-6.9306	-7.56825	-7.36543	-6.04007	-6.84186	-7.97549	-8.5866	-8.31993
572	-8.78888	-7.66239	-9.40896	-7.12966	-8.52776	-7.32426	-10.392	-10.2081	-9.45016	-9.00807	-9.9092	-7.7845	-7.00985	-7.80828	-7.4782	-6.18291	-6.9726	-8.17506	-8.64877	-8.41634
573	-8.92807	-7.84285	-9.55273	-7.20281	-8.49555	-7.41837	-10.4065	-10.3008	-9.57386	-9.03341	-10.1541	-7.99536	-7.10373	-8.05549	-7.59994	-6.34143	-7.11715	-8.37055	-8.70717	-8.50974
574	-9.07049	-8.03454	-9.69139	-7.27847	-8.46173	-7.52289	-10.4067	-10.3672	-9.69152	-9.05969	-10.3979	-8.20486	-7.21157	-8.30897	-7.7301	-6.51543	-7.27492	-8.56175	-8.76155	-8.59992
575	-9.214	-8.23607	-9.8225	-7.35733	-8.4268	-7.63722	-10.3905	-10.4062	-9.80093	-9.08569	-10.6355	-8.41275	-7.33266	-8.5675	-7.86805	-6.70469	-7.44519	-8.74818	-8.81161	-8.68654
576	-9.35645	-8.4459	-9.94365	-7.43993	-8.39125	-7.7607	-10.3564	-10.4169	-9.89994	-9.11028	-10.8616	-8.61846	-7.46625	-8.82955	-8.01306	-6.90887	-7.62719	-8.92908	-8.85704	-8.76919
577	-9.49564	-8.66233	-10.0525	-7.52663	-8.35557	-7.89259	-10.3034	-10.3989	-9.98647	-9.13246	-11.071	-8.82116	-7.61152	-9.09326	-8.16426	-7.12755	-7.81999	-9.10347	-8.89753	-8.8474
578	-9.62935	-8.88347	-10.1467	-7.61765	-8.32025	-8.03205	-10.2308	-10.3522	-10.0586	-9.15132	-11.2585	-9.01973	-7.76758	-9.35644	-8.32067	-7.36016	-8.02256	-9.27015	-8.93277	-8.92064
579	-9.75536	-9.10723	-10.2242	-7.71307	-8.28572	-8.17815	-10.1385	-10.2772	-10.1145	-9.16606	-11.4188	-9.21281	-7.93344	-9.61655	-8.48119	-7.60598	-8.23369	-9.42777	-8.96246	-8.98836
580	-9.87144	-9.33129	-10.2829	-7.81283	-8.25243	-8.32984	-10.027	-10.1748	-10.1526	-9.17598	-11.5469	-9.39882	-8.10802	-9.87074	-8.64457	-7.86411	-8.45198	-9.57483	-8.98633	-9.04998
581	-9.97542	-9.55314	-10.3213	-7.91677	-8.22078	-8.48597	-9.89692	-10.0464	-10.1717	-9.18049	-11.6383	-9.57601	-8.29011	-10.1158	-8.80945	-8.13338	-8.67586	-9.70973	-9.00414	-9.10492
582	-10.0652	-9.77002	-10.3378	-8.02458	-8.19117	-8.64526	-9.7496	-9.89388	-10.1706	-9.17912	-11.6889	-9.74242	-8.47834	-10.3483	-8.9743	-8.4124	-8.90352	-9.83081	-9.01571	-9.15261
583	-10.1389	-9.97901	-10.3314	-8.13585	-8.16394	-8.8063	-9.58663	-9.71953	-10.1488	-9.17148	-11.6955	-9.89602	-8.67122	-10.5646	-9.1375	-8.69946	-9.13292	-9.93642	-9.02088	-9.19252
584	-10.1947	-10.177	-10.3014	-8.25007	-8.13942	-8.96758	-9.40992	-9.526	-10.1058	-9.15734	-11.6555	-10.0347	-8.86706	-10.7609	-9.29727	-8.99253	-9.3618	-10.0249	-9.01959	-9.22417
585	-10.2309	-10.3607	-10.2475	-8.3666	-8.1179	-9.12745	-9.22167	-9.31623	-10.0416	-9.13653	-11.5678	-10.1563	-9.06403	-10.9332	-9.45174	-9.28918	-9.58765	-10.0949	-9.01181	-9.24714
586	-10.2465	-10.5269	-10.1698	-8.4847	-8.09965	-9.28414	-9.02424	-9.0934	-9.95682	-9.10905	-11.432	-10.2588	-9.26011	-11.0777	-9.59896	-9.58663	-9.80771	-10.1449	-8.99761	-9.26108
587	-10.2402	-10.6722	-10.0691	-8.60354	-8.08489	-9.4358	-8.82013	-8.8608	-9.85213	-9.07497	-11.2494	-10.3402	-9.45311	-11.1908	-9.73689	-9.88166	-10.019	-10.1737	-8.97711	-9.26573
588	-10.2116	-10.7934	-9.94637	-8.72219	-8.0738	-9.58048	-8.61189	-8.62175	-9.72876	-9.03448	-11.022	-10.3987	-9.64068	-11.2691	-9.86348	-10.1707	-10.2185	-10.1806	-8.95051	-9.26095
589	-10.1605	-10.8876	-9.80309	-8.83965	-8.06653	-9.71618	-8.40206	-8.37954	-9.58822	-8.98789	-10.7533	-10.4328	-9.82031	-11.3097	-9.97668	-10.4496	-10.4029	-10.1649	-8.91809	-9.24668
590	-10.0869	-10.952	-9.64115	-8.95481	-8.06321	-9.84085	-8.19312	-8.13735	-9.43234	-8.93559	-10.4477	-10.4413	-9.98942	-11.3104	-10.0745	-10.7142	-10.5688	-10.1265	-8.88019	-9.223
591	-9.99156	-10.9842	-9.46277	-9.06652	-8.0639	-9.95249	-7.98742	-7.89816	-9.2632	-8.87807	-10.1105	-10.4234	-10.1453	-11.2696	-10.155	-10.9596	-10.7129	-10.0654	-8.83722	-9.19011
592	-9.87541	-10.9825	-9.27041	-9.17357	-8.06865	-10.0491	-7.78716	-7.66474	-9.08308	-8.81588	-9.74758	-10.3787	-10.2853	-11.1867	-10.2165	-11.1812	-10.8321	-9.98216	-8.78965	-9.14832
593	-9.73987	-10.9456	-9.06678	-9.27471	-8.07746	-10.1288	-7.59436	-7.43958	-8.8944	-8.74967	-9.36524	-10.3073	-10.4067	-11.0619	-10.2574	-11.3738	-10.9232	-9.87774	-8.73802	-9.09806
594	-9.5867	-10.8731	-8.85467	-9.36868	-8.0903	-10.19	-7.41083	-7.22488	-8.69966	-8.68012	-8.96989	-10.2099	-10.507	-10.8965	-10.2765	-11.5326	-10.9837	-9.75342	-8.6829	-9.03988
595	-9.41794	-10.7652	-8.63694	-9.45421	-8.10708	-10.231	-7.23815	-7.02257	-8.50137	-8.60798	-8.56786	-10.0874	-10.5838	-10.6927	-10.2728	-11.6531	-11.0111	-9.61084	-8.62491	-8.97445
596	-9.23592	-10.6229	-8.41645	-9.53007	-8.12772	-10.2506	-7.07769	-6.83424	-8.302	-8.53401	-8.1652	-9.9415	-10.635	-10.4534	-10.2457	-11.7309	-11.0039	-9.45196	-8.5647	-8.9025
597	-9.04313	-10.4479	-8.19597	-9.59508	-8.15206	-10.2479	-6.93062	-6.66123	-8.10396	-8.45901	-7.76751	-9.77414	-10.6588	-10.1826	-10.195	-11.7625	-10.9609	-9.27899	-8.50293	-8.82489
598	-8.84221	-10.2427	-7.97812	-9.64814	-8.17993	-10.2223	-6.79786	-6.50458	-7.90948	-8.38378	-7.37978	-9.58773	-10.6538	-9.88476	-10.121	-11.7453	-10.8816	-9.09435	-8.44031	-8.74251
599	-8.63583	-10.0105	-7.76536	-9.68827	-8.21111	-10.1736	-6.68018	-6.3651	-7.72069	-8.3091	-7.00635	-9.38498	-10.6193	-9.56494	-10.0243	-11.6775	-10.7665	-8.90061	-8.3775	-8.65632
600	-8.15254	-7.12502	-11.7569	-7.11467	-6.30516	-8.23412	-7.42218	-6.46579	-8.63918	-7.66943	-9.52297	-5.68299	-6.92277	-9.10875	-6.74876	-5.55824	-9.63426	-7.74291	-9.19726	-9.58804
601	-8.67536	-7.49267	-11.8794	-7.52695	-6.94156	-8.56735	-8.04195	-7.14874	-8.89019	-7.96649	-9.63768	-6.16536	-7.64786	-9.09767	-7.10098	-6.28221	-9.33278	-7.90961	-9.20523	-9.60187
602	-9.14918	-7.83693	-12.0046	-7.90854	-7.52686	-8.89141	-8.62329	-7.78037	-9.15043	-8.24403	-9.75795	-6.61354	-8.30878	-9.12259	-7.44161	-6.94927	-9.06718	-8.05013	-9.19568	-9.63606
603	-9.57647	-8.1604	-12.1224	-8.26266	-8.06748	-9.20566	-9.16971	-8.36712	-9.41678	-8.50359	-9.88006	-7.03311	-8.91175	-9.17766	-7.77277	-7.56801	-8.83412	-8.16732	-9.16975	-9.68578
604	-9.95844	-8.4649	-12.2234	-8.59159	-8.56818	-9.50885	-9.68293	-8.91352	-9.68588	-8.7461	-10.0004	-7.42855	-9.46094	-9.25761	-8.09588	-8.14501	-8.63072	-8.26369	-9.12864	-9.74661
605	-10.2952	-8.75153	-12.2991	-8.8968	-9.03213	-9.79916	-10.163	-9.42227	-9.95408	-8.97202	-10.1156	-7.80332	-9.95859	-9.35755	-8.41166	-8.68499	-8.45447	-8.34145	-9.0736	-9.81448
606	-10.5862	-9.02076	-12.3417	-9.17905	-9.46114	-10.0743	-10.6085	-9.89445	-10.2174	-9.18135	-10.2222	-8.15995	-10.4054	-9.47295	-8.72022	-9.19092	-8.30318	-8.40256	-9.00599	-9.88564
607	-10.8301	-9.27251	-12.3449	-9.43844	-9.85574	-10.3313	-11.0167	-10.3297	-10.4717	-9.37373	-10.3172	-8.50009	-10.8005	-9.59954	-9.02106	-9.66416	-8.17492	-8.44875	-8.92722	-9.95661
608	-11.0252	-9.5062	-12.3034	-9.67457	-10.2154	-10.5673	-11.3837	-10.7262	-10.7125	-9.54848	-10.3977	-8.82459	-11.1422	-9.73323	-9.31311	-10.1047	-8.06798	-8.48161	-8.83877	-10.0242
609	-11.17	-9.72084	-12.2132	-9.88659	-10.5387	-10.7786	-11.7049	-11.0814	-10.9351	-9.70473	-10.4609	-9.13357	-11.4278	-9.87011	-9.59476	-10.5111	-7.98084	-8.50257	-8.74218	-10.0853
610	-11.2628	-9.91513	-12.072	-10.0733	-10.8234	-10.9619	-11.975	-11.3918	-11.1347	-9.84142	-10.5045	-9.4265	-11.6544	-10.0064	-9.86395	-10.8809	-7.91213	-8.51294	-8.639	-10.1374
611	-11.3026	-10.0875	-11.8793	-10.2334	-11.067	-11.1135	-12.1887	-11.6531	-11.3066	-9.95742	-10.5264	-9.70226	-11.8189	-10.1384	-10.1182	-11.2108	-7.86059	-8.51395	-8.53081	-10.1779
612	-11.289	-10.2363	-11.6359	-10.3654	-11.2663	-11.23	-12.3408	-11.8611	-11.4462	-10.0516	-10.525	-9.95919	-11.9186	-10.2625	-10.3545	-11.4968	-7.8251	-8.50673	-8.41919	-10.2047
613	-11.2221	-10.3598	-11.3445	-10.4679	-11.4186	-11.3083	-12.4264	-12.0116	-11.549	-10.1229	-10.4991	-10.1952	-11.9514	-10.3754	-10.5699	-11.7345	-7.80461	-8.49236	-8.30567	-10.216
614	-11.1034	-10.4562	-11.0092	-10.5394	-11.521	-11.3459	-12.4419	-12.1007	-11.6114	-10.1703	-10.448	-10.408	-11.9162	-10.4737	-10.7609	-11.9193	-7.79814	-8.47185	-8.19177	-10.2103
615	-10.9349	-10.5242	-10.6352	-10.5789	-11.5712	-11.3407	-12.385	-12.1255	-11.63	-10.1932	-10.3715	-10.5949	-11.8132	-10.5545	-10.9243	-12.0469	-7.80477	-8.44617	-8.07893	-10.1865
616	-10.7201	-10.5622	-10.2291	-10.5857	-11.5676	-11.2914	-12.2549	-12.0841	-11.6025	-10.191	-10.2698	-10.7531	-11.644	-10.615	-11.0565	-12.1137	-7.82362	-8.41624	-7.96851	-10.1437
617	-10.4631	-10.5695	-9.79789	-10.5595	-11.5096	-11.1979	-12.0527	-11.9759	-11.5276	-10.1637	-10.144	-10.8801	-11.4118	-10.6528	-11.1546	-12.1168	-7.85385	-8.38294	-7.86178	-10.0818
618	-10.169	-10.5456	-9.34896	-10.5004	-11.3974	-11.0607	-11.7816	-11.8019	-11.4049	-10.1114	-9.99531	-10.9732	-11.1214	-10.6658	-11.2157	-12.0547	-7.89462	-8.34712	-7.75993	-10.0007
619	-9.84353	-10.4903	-8.88981	-10.4091	-11.2327	-10.8815	-11.4466	-11.5649	-11.2353	-10.0349	-9.82564	-11.0303	-10.7787	-10.6526	-11.2375	-11.927	-7.94513	-8.30956	-7.66402	-9.90091
620	-9.49294	-10.4042	-8.42768	-10.2869	-11.018	-10.6628	-11.0546	-11.2691	-11.021	-9.93496	-9.63722	-11.0496	-10.3912	-10.612	-11.2185	-11.7352	-8.00456	-8.27103	-7.57503	-9.78332
621	-9.12365	-10.2883	-7.96933	-10.1357	-10.7574	-10.4083	-10.6137	-10.9204	-10.765	-9.81312	-9.43267	-11.0299	-9.96692	-10.5435	-11.1577	-11.4823	-8.07208	-8.23225	-7.4938	-9.64913
622	-8.74216	-10.1443	-7.52085	-9.95793	-10.4556	-10.1223	-10.1332	-10.5259	-10.4716	-9.67109	-9.21484	-10.9706	-9.51457	-10.4473	-11.0551	-11.173	-8.14685	-8.1939	-7.42109	-9.49989
623	-8.35476	-9.97431	-7.08754	-9.75631	-10.1185	-9.80956	-9.62324	-10.0938	-10.1458	-9.51095	-8.98679	-10.8722	-9.04302	-10.3241	-10.9117	-10.8133	-8.22801	-8.15661	-7.35752	-9.33743
624	-7.96738	-9.78093	-6.67384	-9.53415	-9.75241	-9.47558	-9.09383	-9.63261	-9.79336	-9.33508	-8.75164	-10.7355	-8.56095	-10.1752	-10.7292	-10.4105	-8.31466	-8.12096	-7.30363	-9.16381
625	-7.58545	-9.56719	-6.28332	-9.295	-9.3642	-9.12594	-8.55486	-9.15146	-9.42043	-9.14606	-8.51254	-10.5625	-8.07658	-10.0022	-10.5104	-9.97282	-8.40587	-8.0875	-7.25985	-8.98123
626	-7.2138	-9.33641	-5.9187	-9.0426	-8.96081	-8.76632	-8.01558	-8.65913	-9.03328	-8.94662	-8.27255	-10.3557	-7.59739	-9.80773	-10.2587	-9.50891	-8.50067	-8.05672	-7.22653	-8.79205
627	-6.85658	-9.09216	-5.58192	-8.78079	-8.54907	-8.40223	-7.48432	-8.16402	-8.63821	-8.73959	-8.03462	-10.1186	-7.13	-9.59433	-9.97834	-9.02759	-8.59806	-8.02906	-7.20391	-8.59864
628	-6.51724	-8.83809	-5.27421	-8.51341	-8.13549	-8.03892	-6.96833	-7.67383	-8.24122	-8.5278	-7.80149	-9.85498	-6.68001	-9.36513	-9.67409	-8.5375	-8.69698	-8.00493	-7.19218	-8.40338
629	-6.19856	-8.5779	-4.99622	-8.24416	-7.72609	-7.68122	-6.47363	-7.19534	-7.84793	-8.31404	-7.57566	-9.56934	-6.25201	-9.12343	-9.35102	-8.04675	-8.79634	-7.98466	-7.19141	-8.2086
630	-5.90265	-8.3152	-4.74807	-7.97659	-7.32624	-7.33344	-6.00501	-6.73435	-7.46339	-8.10102	-7.35939	-9.26637	-5.84956	-8.87267	-9.01443	-7.56272	-8.89501	-7.96856	-7.20165	-8.0165
631	-5.63104	-8.05342	-4.52946	-7.71397	-6.94059	-6.99931	-5.56606	-6.29558	-7.09203	-7.89126	-7.15463	-8.95093	-5.47526	-8.61633	-8.6696	-7.09188	-8.99182	-7.95686	-7.22285	-7.82918
632	-5.38472	-7.7958	-4.33981	-7.45925	-6.57305	-6.682	-5.15927	-5.88272	-6.73759	-7.68712	-6.96307	-8.62791	-5.13085	-8.35782	-8.32168	-6.63969	-9.08559	-7.94978	-7.25491	-7.64856
633	-5.16424	-7.54527	-4.17828	-7.21506	-6.22675	-6.38405	-4.78615	-5.49847	-6.40313	-7.49073	-6.78611	-8.30204	-4.81731	-8.10042	-7.97552	-6.21055	-9.17511	-7.94746	-7.29766	-7.47636
634	-4.96976	-7.30444	-4.04391	-6.98367	-5.9041	-6.10746	-4.44737	-5.14464	-6.09103	-7.30398	-6.6249	-7.9778	-4.535	-7.84722	-7.63558	-5.80788	-9.25919	-7.95001	-7.35088	-7.31413
635	-4.80113	-7.07562	-3.93563	-6.76699	-5.60683	-5.85369	-4.14288	-4.82226	-5.80308	-7.12852	-6.48032	-7.65932	-4.28372	-7.60104	-7.30583	-5.43412	-9.33663	-7.95747	-7.41429	-7.16319
636	-4.65799	-6.86074	-3.85234	-6.56658	-5.33608	-5.62376	-3.87211	-4.53167	-5.54046	-6.96578	-6.35304	-7.35028	-4.06291	-7.36439	-6.98971	-5.09086	-9.40627	-7.96985	-7.48754	-7.02468
637	-4.53978	-6.66142	-3.79297	-6.38368	-5.09246	-5.41824	-3.63405	-4.2727	-5.30391	-6.81691	-6.24353	-7.05391	-3.87166	-7.13951	-6.69011	-4.77896	-9.467	-7.98713	-7.57024	-6.89954
638	-4.44585	-6.47893	-3.75649	-6.21922	-4.87616	-5.23738	-3.4274	-4.04475	-5.09371	-6.68289	-6.15211	-6.77295	-3.7089	-6.92827	-6.4094	-4.49865	-9.5178	-8.00921	-7.6619	-6.78855
639	-4.37549	-6.3143	-3.74197	-6.07388	-4.68702	-5.08117	-3.25065	-3.84689	-4.90983	-6.56445	-6.07891	-6.50964	-3.57338	-6.73226	-6.14941	-4.24964	-9.55772	-8.03598	-7.76201	-6.69229
640	-9.09892	-9.05766	-9.97281	-8.38989	-9.29612	-9.83502	-12.5206	-9.26747	-13.0098	-8.71685	-10.8387	-10.6382	-10.2726	-8.39034	-9.68698	-7.75614	-7.07655	-7.41651	-6.72504	-4.01245
641	-8.93808	-8.72681	-9.80572	-8.76759	-9.48758	-9.92216	-12.4072	-9.45852	-12.6496	-9.1321	-10.9331	-10.7487	-10.1721	-8.63188	-9.48359	-7.6112	-6.87288	-7.29832	-6.41702	-4.197
642	-8.81948	-8.46427	-9.67875	-9.11833	-9.67934	-10.0391	-12.3325	-9.65864	-12.3815	-9.53971	-11.0282	-10.894	-10.1143	-8.86535	-9.3255	-7.49503	-6.71505	-7.2233	-6.16656	-4.37608
643	-8.73775	-8.26228	-9.58549	-9.44267	-9.86816	-10.1785	-12.2824	-9.86364	-12.1862	-9.93761	-11.1176	-11.0638	-10.0911	-9.09005	-9.20643	-7.40564	-6.59924	-7.18731	-5.9687	-4.55258
644	-8.68814	-8.11399	-9.52033	-9.74042	-10.0507	-10.3335	-12.2448	-10.0693	-12.0469	-10.3228	-11.1953	-11.2484	-10.0951	-9.30495	-9.12088	-7.34122	-6.52201	-7.18668	-5.81891	-4.72909
645	-8.6664	-8.01338	-9.47831	-10.0107	-10.2237	-10.4977	-12.209	-10.2714	-11.949	-10.6915	-11.2563	-11.4385	-10.1198	-9.50866	-9.06403	-7.30011	-6.48028	-7.21814	-5.71314	-4.90792
646	-8.66875	-7.9551	-9.45507	-10.2522	-10.3836	-10.6649	-12.1659	-10.4655	-11.8799	-11.039	-11.2956	-11.6253	-10.1594	-9.69958	-9.03157	-7.2808	-6.47131	-7.27877	-5.64779	-5.0911
647	-8.69177	-7.93444	-9.44671	-10.4632	-10.5272	-10.829	-12.1074	-10.6474	-11.8284	-11.3602	-11.3093	-11.8004	-10.2084	-9.87587	-9.01968	-7.28186	-6.49265	-7.36594	-5.61965	-5.2804
648	-8.73235	-7.94721	-9.44976	-10.6416	-10.6511	-10.9843	-12.0273	-10.8128	-11.7847	-11.6491	-11.2939	-11.9555	-10.2621	-10.0355	-9.02495	-7.30199	-6.54213	-7.47723	-5.62593	-5.47739
649	-8.78762	-7.98962	-9.4611	-10.7853	-10.7522	-11.1252	-11.9204	-10.9573	-11.7407	-11.8996	-11.2469	-12.083	-10.3159	-10.1765	-9.04427	-7.33996	-6.6178	-7.61043	-5.66421	-5.68343
650	-8.85492	-8.05829	-9.47795	-10.8924	-10.8276	-11.2465	-11.7831	-11.0769	-11.6889	-12.1056	-11.1666	-12.176	-10.366	-10.2968	-9.07482	-7.3946	-6.71791	-7.76344	-5.73238	-5.89965
651	-8.93177	-8.15009	-9.49778	-10.961	-10.8748	-11.3432	-11.613	-11.1679	-11.6235	-12.2608	-11.0522	-12.228	-10.4086	-10.3942	-9.11404	-7.4648	-6.84088	-7.93421	-5.82864	-6.12702
652	-9.0158	-8.26214	-9.51833	-10.9898	-10.8918	-11.4109	-11.4093	-11.2269	-11.5395	-12.3599	-10.9038	-12.2339	-10.4405	-10.4671	-9.15954	-7.54947	-6.98524	-8.12074	-5.95142	-6.36628
653	-9.10476	-8.39171	-9.53759	-10.9779	-10.8768	-11.4456	-11.1723	-11.251	-11.4333	-12.3981	-10.7225	-12.1895	-10.4589	-10.5137	-9.20913	-7.64754	-7.1496	-8.32098	-6.09939	-6.61798
654	-9.19647	-8.53618	-9.55374	-10.925	-10.8289	-11.4443	-10.9037	-11.2381	-11.302	-12.3718	-10.5101	-12.092	-10.4613	-10.5327	-9.26077	-7.75794	-7.3326	-8.53285	-6.27137	-6.88246
655	-9.28885	-8.693	-9.56522	-10.8316	-10.7479	-11.4045	-10.6062	-11.1866	-11.1443	-12.279	-10.2693	-11.9403	-10.4459	-10.5232	-9.31256	-7.87955	-7.5329	-8.75411	-6.46633	-7.15981
656	-9.37987	-8.85962	-9.57064	-10.6989	-10.6341	-11.3248	-10.2833	-11.0959	-10.9596	-12.1193	-10.0036	-11.7348	-10.411	-10.4847	-9.36273	-8.01125	-7.74911	-8.98241	-6.68328	-7.44986
657	-9.46758	-9.0335	-9.56885	-10.5289	-10.4886	-11.2046	-9.93947	-10.9663	-10.7485	-11.8941	-9.71676	-11.4773	-10.3557	-10.4173	-9.40965	-8.15185	-7.97973	-9.21519	-6.92129	-7.75216
658	-9.55008	-9.21202	-9.5589	-10.3245	-10.3132	-11.0446	-9.57952	-10.7991	-10.5123	-11.6067	-9.41317	-11.1716	-10.2794	-10.3215	-9.4518	-8.30009	-8.22315	-9.44973	-7.17939	-8.06592
659	-9.62559	-9.39253	-9.54004	-10.0892	-10.1104	-10.8462	-9.20858	-10.5962	-10.2535	-11.2622	-9.09737	-10.8224	-10.1822	-10.1984	-9.48782	-8.45462	-8.47758	-9.68306	-7.45652	-8.38999
660	-9.69241	-9.57227	-9.51177	-9.82687	-9.88307	-10.6121	-8.83185	-10.3607	-9.97477	-10.8672	-8.77395	-10.4359	-10.0646	-10.0495	-9.51648	-8.61401	-8.741	-9.912	-7.75151	-8.72279
661	-9.74895	-9.74841	-9.47376	-9.54215	-9.63479	-10.3457	-8.45441	-10.0962	-9.67975	-10.4296	-8.44748	-10.0189	-9.92742	-9.87709	-9.53669	-8.77672	-9.01116	-10.1332	-8.06296	-9.06232
662	-9.79378	-9.91805	-9.42591	-9.23981	-9.36935	-10.0511	-8.08108	-9.80687	-9.37222	-9.95827	-8.12228	-9.5791	-9.77215	-9.6836	-9.54754	-8.94109	-9.28549	-10.343	-8.3892	-9.40605
663	-9.82563	-10.0782	-9.36833	-8.92479	-9.0908	-9.7331	-7.71627	-9.49752	-9.05624	-9.4624	-7.8024	-9.12404	-9.60054	-9.47195	-9.54828	-9.10535	-9.56114	-10.5378	-8.72822	-9.75094
664	-9.84343	-10.226	-9.30132	-8.60205	-8.80331	-9.39687	-7.3639	-9.17306	-8.73593	-8.95133	-7.49148	-8.66135	-9.41472	-9.24532	-9.53834	-9.26762	-9.83489	-10.7138	-9.07762	-10.0934
665	-9.8463	-10.3584	-9.22536	-8.27637	-8.51098	-9.04776	-7.02736	-8.83858	-8.41535	-8.43408	-7.19274	-8.19824	-9.21704	-9.00707	-9.51734	-9.42593	-10.1032	-10.8672	-9.43453	-10.4292
666	-9.83362	-10.4725	-9.14109	-7.95227	-8.2178	-8.69111	-6.70944	-8.49907	-8.09834	-7.91904	-6.90894	-7.74135	-9.01005	-8.76065	-9.4851	-9.57819	-10.3623	-10.9944	-9.79553	-10.7536
667	-9.80504	-10.5657	-9.04933	-7.6339	-7.92755	-8.33214	-6.41241	-8.15931	-7.7885	-7.41371	-6.64235	-7.29655	-8.79644	-8.50951	-9.44163	-9.72227	-10.6079	-11.092	-10.1566	-11.0614
668	-9.76044	-10.6354	-8.951	-7.32499	-7.64368	-7.97575	-6.13798	-7.82379	-7.48903	-6.92457	-6.39481	-6.86887	-8.5789	-8.25701	-9.38714	-9.85598	-10.8357	-11.1568	-10.5133	-11.3469
669	-9.70002	-10.6794	-8.84715	-7.02878	-7.36928	-7.62643	-5.88736	-7.49653	-7.20277	-6.457	-6.16771	-6.46244	-8.36011	-8.00634	-9.32201	-9.97714	-11.0412	-11.1863	-10.8602	-11.604
670	-9.62422	-10.696	-8.7389	-6.748	-7.10709	-7.28818	-5.66136	-7.18111	-6.93213	-6.01525	-5.96207	-6.08053	-8.14267	-7.7605	-9.24684	-10.0836	-11.2198	-11.1784	-11.1916	-11.8266
671	-9.53378	-10.6838	-8.62744	-6.4849	-6.8594	-6.96443	-5.46039	-6.88058	-6.67909	-5.60248	-5.77856	-5.72554	-7.92904	-7.52218	-9.16237	-10.1733	-11.367	-11.1318	-11.5013	-12.0085
672	-9.42967	-10.6419	-8.514	-6.24127	-6.62814	-6.65807	-5.28455	-6.59748	-6.44523	-5.22088	-5.61755	-5.39912	-7.7215	-7.29381	-9.0695	-10.2443	-11.4786	-11.046	-11.7824	-12.144
673	-9.31311	-10.5701	-8.39982	-6.01844	-6.41482	-6.37141	-5.13369	-6.33382	-6.23175	-4.87174	-5.47918	-5.10225	-7.52211	-7.07748	-8.96925	-10.2949	-11.5507	-10.9215	-12.0279	-12.2275
674	-9.18551	-10.4687	-8.28612	-5.81736	-6.22064	-6.10624	-5.00747	-6.09118	-6.03951	-4.55562	-5.36338	-4.83532	-7.33272	-6.87499	-8.86279	-10.3236	-11.5802	-10.7593	-12.231	-12.2548
675	-9.04845	-10.3387	-8.17411	-5.63862	-6.04644	-5.86388	-4.90543	-5.87066	-5.86906	-4.27244	-5.26993	-4.59826	-7.15494	-6.68782	-8.75132	-10.3293	-11.5646	-10.5617	-12.3849	-12.2225
676	-8.90366	-10.1816	-8.06494	-5.48255	-5.8928	-5.64518	-4.82698	-5.67299	-5.72068	-4.02165	-5.19853	-4.39063	-6.99013	-6.51715	-8.63613	-10.3111	-11.5024	-10.3315	-12.4833	-12.1285
677	-8.75295	-9.99946	-7.95971	-5.34922	-5.76004	-5.45064	-4.77152	-5.4986	-5.59447	-3.80231	-5.14876	-4.21171	-6.83945	-6.36389	-8.51855	-10.2687	-11.3931	-10.0723	-12.521	-11.9726
678	-8.59818	-9.79495	-7.85945	-5.23851	-5.64831	-5.28045	-4.7384	-5.34762	-5.49033	-3.61324	-5.1202	-4.06057	-6.7038	-6.22873	-8.39991	-10.202	-11.2372	-9.78843	-12.494	-11.756
679	-8.44121	-9.57108	-7.76509	-5.15018	-5.55757	-5.13453	-4.727	-5.21996	-5.40804	-3.45307	-5.1124	-3.93617	-6.58392	-6.11212	-8.28153	-10.1116	-11.0367	-9.48446	-12.3996	-11.4816
680	-9.86681	-9.86944	-10.9669	-12.6091	-11.3251	-10.5546	-11.7468	-12.4085	-10.1106	-10.3897	-9.2924	-11.6789	-11.9362	-10.9464	-11.2703	-10.7	-13.2973	-8.8124	-11.7868	-8.98525
681	-9.29728	-9.31233	-10.3523	-12.2035	-10.6608	-9.78743	-11.0493	-11.6901	-9.2639	-9.73826	-8.68038	-10.8075	-11.281	-10.0496	-10.636	-9.85914	-12.5421	-8.39415	-10.9227	-8.39814
682	-8.7181	-8.74606	-9.72095	-11.722	-9.98045	-9.03913	-10.3142	-10.955	-8.45043	-9.07031	-8.07008	-9.94567	-10.5957	-9.17878	-9.97302	-9.0412	-11.7437	-7.96764	-10.0776	-7.84541
683	-8.13917	-8.18014	-9.08357	-11.1756	-9.29529	-8.31808	-9.55718	-10.214	-7.67818	-8.39849	-7.47097	-9.10489	-9.89269	-8.34401	-9.29439	-8.25548	-10.9165	-7.54036	-9.2605	-7.32972
684	-7.56945	-7.62318	-8.45024	-10.5769	-8.61599	-7.63134	-8.79319	-9.47763	-6.95321	-7.7343	-6.89112	-8.29536	-9.18424	-7.55328	-8.61247	-7.50968	-10.0758	-7.11899	-8.47961	-6.8529
685	-7.01667	-7.08265	-7.83007	-9.93959	-7.95222	-6.98442	-8.03605	-8.7559	-6.27974	-7.0877	-6.33717	-7.52549	-8.48189	-6.81263	-7.93859	-6.80962	-9.23647	-6.70933	-7.74147	-6.41602
686	-6.48726	-6.56477	-7.23093	-9.27771	-7.31223	-6.38136	-7.29779	-8.05768	-5.66023	-6.46692	-5.81423	-6.80172	-7.79596	-6.12609	-7.28267	-6.15935	-8.4121	-6.31624	-7.05104	-6.01946
687	-5.98627	-6.07447	-6.65928	-8.60474	-6.7028	-5.82471	-6.58837	-7.39045	-5.0956	-5.87842	-5.32602	-6.12853	-7.13521	-5.49589	-6.65293	-5.56123	-7.61446	-5.94365	-6.41165	-5.66301
688	-5.51745	-5.61543	-6.12016	-7.9332	-6.1291	-5.31574	-5.91557	-6.76013	-4.58549	-5.32695	-4.87491	-5.50861	-6.50671	-4.92266	-6.05587	-5.01615	-6.85316	-5.59456	-5.82513	-5.34594
689	-5.08333	-5.19019	-5.61719	-7.27414	-5.59481	-4.85462	-5.28502	-6.17107	-4.12851	-4.81563	-4.46219	-4.94303	-5.9158	-4.4057	-5.49626	-4.52377	-6.13551	-5.27118	-5.292	-5.06714
690	-4.68536	-4.80023	-5.15273	-6.63692	-5.10222	-4.44059	-4.7004	-5.62614	-3.72248	-4.34618	-4.08815	-4.43154	-5.36619	-3.94331	-4.97728	-4.08274	-5.46663	-4.97495	-4.81165	-4.82524
691	-4.32412	-4.44616	-4.72801	-6.02904	-4.6524	-4.07218	-4.16363	-5.12686	-3.36469	-3.91914	-3.75231	-3.97282	-4.86008	-3.53301	-4.50071	-3.69101	-4.84958	-4.70669	-4.38263	-4.61863
692	-3.99938	-4.12787	-4.34329	-5.45619	-4.24541	-3.74742	-3.6752	-4.67362	-3.05206	-3.53407	-3.45361	-3.56473	-4.39841	-3.17178	-4.06713	-3.34597	-4.28566	-4.46666	-4.00279	-4.44563
693	-3.71036	-3.84468	-3.99809	-4.92231	-3.8805	-3.46395	-3.23438	-4.26587	-2.78134	-3.18978	-3.19054	-3.20458	-3.98104	-2.8563	-3.67612	-3.04469	-3.77473	-4.25471	-3.66955	-4.30452
694	-3.45582	-3.59544	-3.6913	-4.42981	-3.55627	-3.21924	-2.83955	-3.90232	-2.54919	-2.8845	-2.96126	-2.88928	-3.60698	-2.58305	-3.32653	-2.78405	-3.31547	-4.07037	-3.38002	-4.19357
695	-3.23423	-3.37873	-3.42136	-3.97977	-3.2709	-3.01062	-2.48844	-3.58114	-2.35237	-2.61609	-2.76378	-2.61556	-3.27461	-2.34853	-3.0166	-2.56089	-2.90569	-3.91289	-3.13119	-4.11115
696	-3.04382	-3.19291	-3.18644	-3.57216	-3.02223	-2.83547	-2.17829	-3.3001	-2.18772	-2.38217	-2.59601	-2.38008	-2.98184	-2.14928	-2.74421	-2.37207	-2.54259	-3.78138	-2.91999	-4.05571
697	-2.88275	-3.03624	-2.98449	-3.20607	-2.80794	-2.69121	-1.90611	-3.05676	-2.05231	-2.18023	-2.45587	-2.17953	-2.72628	-1.98201	-2.50698	-2.2146	-2.22297	-3.67486	-2.74344	-4.02585
698	-2.74915	-2.90695	-2.81341	-2.87995	-2.62564	-2.57542	-1.66874	-2.84856	-1.94339	-2.00774	-2.34132	-2.01074	-2.50539	-1.84364	-2.30238	-2.08565	-1.94341	-3.59228	-2.59868	-4.02031
699	-2.64119	-2.8033	-2.67107	-2.59176	-2.47296	-2.48582	-1.46303	-2.67293	-1.85849	-1.86222	-2.25042	-1.87071	-2.31655	-1.73131	-2.12789	-1.98263	-1.7004	-3.53261	-2.48305	-4.03798
700	-2.55712	-2.72364	-2.5554	-2.33914	-2.3476	-2.42037	-1.28589	-2.52734	-1.79537	-1.7413	-2.1814	-1.75666	-2.1572	-1.64244	-1.98102	-1.90315	-1.49048	-3.49488	-2.39407	-4.07793
701	-2.49531	-2.66641	-2.46446	-2.11957	-2.24737	-2.37723	-1.13437	-2.40941	-1.75209	-1.64276	-2.13262	-1.66606	-2.02484	-1.57472	-1.85939	-1.8451	-1.31032	-3.47818	-2.32955	-4.13939
702	-2.45428	-2.63022	-2.39644	-1.93045	-2.17029	-2.35478	-1.00569	-2.3169	-1.72694	-1.56455	-2.10264	-1.59664	-1.91714	-1.52612	-1.76076	-1.80661	-1.15674	-3.4817	-2.28752	-4.22176
703	-2.43272	-2.61382	-2.34969	-1.76921	-2.11451	-2.35165	-0.897301	-2.24777	-1.71848	-1.50483	-2.0902	-1.54637	-1.83194	-1.49485	-1.6831	-1.78608	-1.02679	-3.50473	-2.26627	-4.32459
704	-2.42948	-2.61613	-2.32276	-1.63336	-2.07842	-2.36667	-0.806844	-2.20019	-1.7255	-1.46194	-2.09421	-1.5135	-1.76727	-1.47941	-1.62453	-1.78213	-0.917759	-3.5467	-2.26434	-4.4476
705	-2.44361	-2.63626	-2.31438	-1.52054	-2.0606	-2.39893	-0.732205	-2.17255	-1.74703	-1.43443	-2.11381	-1.49652	-1.72137	-1.47852	-1.58341	-1.79363	-0.827189	-3.60717	-2.28053	-4.59062
706	-2.47433	-2.67348	-2.32348	-1.42856	-2.05984	-2.44769	-0.671493	-2.16345	-1.78232	-1.42107	-2.1483	-1.49417	-1.69271	-1.49115	-1.55829	-1.81969	-0.752867	-3.68581	-2.31386	-4.75363
707	-2.52104	-2.72724	-2.34918	-1.35543	-2.07513	-2.51246	-0.623036	-2.17173	-1.83082	-1.4208	-2.19715	-1.5054	-1.67994	-1.51647	-1.54792	-1.85959	-0.692832	-3.78244	-2.3636	-4.93669
708	-2.58331	-2.79718	-2.3908	-1.29933	-2.10568	-2.59292	-0.58537	-2.19642	-1.89217	-1.43277	-2.26003	-1.52938	-1.68196	-1.55388	-1.55128	-1.91287	-0.645355	-3.89702	-2.42922	-5.13996
709	-2.6609	-2.88308	-2.44784	-1.25867	-2.15088	-2.68894	-0.557227	-2.23679	-1.9662	-1.4563	-2.33676	-1.56549	-1.69784	-1.60293	-1.56752	-1.97921	-0.608932	-4.0296	-2.51039	-5.36367
710	-2.75371	-2.98491	-2.51997	-1.23206	-2.21031	-2.80056	-0.537518	-2.29228	-2.05291	-1.49087	-2.42734	-1.6133	-1.72687	-1.6634	-1.59596	-2.05849	-0.582266	-4.18037	-2.60699	-5.60807
711	-2.86182	-3.10277	-2.60707	-1.21828	-2.28371	-2.92801	-0.525326	-2.36255	-2.15246	-1.53614	-2.53189	-1.67253	-1.76851	-1.73518	-1.63613	-2.15077	-0.564253	-4.34963	-2.71908	-5.87342
712	-2.98545	-3.23692	-2.70914	-1.21633	-2.37103	-3.07167	-0.519882	-2.44743	-2.26517	-1.59192	-2.65073	-1.7431	-1.8224	-1.81835	-1.68771	-2.25624	-0.553962	-4.53776	-2.84688	-6.15997
713	-3.12497	-3.38776	-2.82636	-1.22539	-2.47235	-3.23204	-0.520557	-2.54691	-2.39149	-1.65816	-2.78427	-1.82505	-1.88834	-1.91315	-1.75052	-2.37527	-0.550623	-4.74522	-2.99079	-6.46785
714	-3.28088	-3.55583	-2.95906	-1.2448	-2.58791	-3.40981	-0.526848	-2.66117	-2.53204	-1.73494	-2.93308	-1.91861	-1.9663	-2.01992	-1.82456	-2.50837	-0.553609	-4.97255	-3.15134	-6.7971
715	-3.45382	-3.74178	-3.10772	-1.27406	-2.71811	-3.60576	-0.538367	-2.79053	-2.68756	-1.82248	-3.09787	-2.02413	-2.0564	-2.13919	-1.90997	-2.65618	-0.562427	-5.22031	-3.32923	-7.14756
716	-3.64455	-3.94639	-3.27295	-1.31283	-2.86349	-3.82082	-0.554827	-2.93547	-2.85891	-1.92115	-3.27947	-2.14208	-2.15891	-2.27157	-2.00699	-2.81949	-0.576699	-5.48908	-3.52528	-7.5188
717	-3.85393	-4.17051	-3.45548	-1.3609	-3.02472	-4.05601	-0.576038	-3.0966	-3.04712	-2.0314	-3.47881	-2.27309	-2.27421	-2.41784	-2.11605	-2.99922	-0.596158	-5.77944	-3.74044	-7.91009
718	-4.08294	-4.41511	-3.65617	-1.41821	-3.20259	-4.31244	-0.601895	-3.27468	-3.2533	-2.15383	-3.69695	-2.4179	-2.40284	-2.5789	-2.23765	-3.19641	-0.620631	-6.0919	-3.97577	-8.32025
719	-4.33263	-4.68121	-3.876	-1.48482	-3.39804	-4.59131	-0.632373	-3.47059	-3.47871	-2.28916	-3.93506	-2.5774	-2.54548	-2.75576	-2.37247	-3.41223	-0.650039	-6.42685	-4.23243	-8.74758
720	-11.1499	-9.15776	-12.2859	-12.1565	-12.3446	-12.9665	-13.8106	-12.0113	-10.1405	-11.5347	-11.999	-11.3887	-13.4847	-11.489	-12.9988	-12.1609	-13.7839	-11.638	-13.9983	-7.45109
721	-11.4336	-9.90625	-12.6488	-12.5809	-12.9689	-13.3101	-14.075	-12.4972	-10.7634	-12.1095	-12.3686	-12.017	-13.8919	-12.0938	-13.2107	-12.5853	-13.9341	-12.1847	-14.2666	-7.75313
722	-11.7512	-10.6169	-13.003	-13.0188	-13.5715	-13.6318	-14.378	-12.9709	-11.3203	-12.6492	-12.745	-12.5819	-14.2924	-12.6702	-13.4135	-12.9899	-14.1346	-12.7126	-14.5439	-8.08949
723	-12.0892	-11.2883	-13.3337	-13.4529	-14.1355	-13.9152	-14.6931	-13.4177	-11.8083	-13.1428	-13.1133	-13.075	-14.6643	-13.2066	-13.5917	-13.3609	-14.3597	-13.209	-14.8058	-8.45679
724	-12.4342	-11.9162	-13.6263	-13.8657	-14.6419	-14.1443	-14.9942	-13.8225	-12.2231	-13.578	-13.4582	-13.4863	-14.9855	-13.6898	-13.7305	-13.6842	-14.5848	-13.6599	-15.0291	-8.85154
725	-12.7727	-12.4938	-13.8663	-14.239	-15.0706	-14.3041	-15.2565	-14.1691	-12.5594	-13.9414	-13.7644	-13.8051	-15.2343	-14.1049	-13.8168	-13.9457	-14.7866	-14.0503	-15.1918	-9.26995
726	-13.091	-13.0121	-14.0399	-14.5543	-15.4006	-14.381	-15.4559	-14.4414	-12.8112	-14.2192	-14.0164	-14.0208	-15.3905	-14.4366	-13.8387	-14.1317	-14.9435	-14.3645	-15.2739	-9.70776
727	-13.3755	-13.4603	-14.1344	-14.7934	-15.6118	-14.3634	-15.5705	-14.6241	-12.973	-14.3984	-14.1997	-14.1239	-15.436	-14.6696	-13.7869	-14.23	-15.0356	-14.5874	-15.2582	-10.1601
728	-13.6126	-13.8266	-14.1392	-14.9395	-15.6862	-14.2431	-15.5809	-14.7033	-13.0401	-14.4674	-14.3009	-14.1069	-15.3563	-14.79	-13.6542	-14.2301	-15.0453	-14.7048	-15.1311	-10.6213
729	-13.7893	-14.0989	-14.0462	-14.9776	-15.6095	-14.0153	-15.4716	-14.6678	-13.0093	-14.4172	-14.3085	-13.9656	-15.1414	-14.7861	-13.4369	-14.1244	-14.9584	-14.7052	-14.8839	-11.0847
730	-13.8937	-14.2655	-13.8505	-14.896	-15.3727	-13.6792	-15.232	-14.5099	-12.8798	-14.2424	-14.2139	-13.6996	-14.7871	-14.6499	-13.134	-13.9087	-14.7646	-14.58	-14.513	-11.5427
731	-13.9157	-14.3166	-13.551	-14.6872	-14.9733	-13.2387	-14.8575	-14.2264	-12.6531	-13.9418	-14.0119	-13.3126	-14.2955	-14.3779	-12.7483	-13.583	-14.4583	-14.3253	-14.0206	-11.9867
732	-13.8471	-14.245	-13.1507	-14.3487	-14.4165	-12.7016	-14.3498	-13.8189	-12.3335	-13.5191	-13.7011	-12.8131	-13.6752	-13.9718	-12.2856	-13.1515	-14.039	-13.9419	-13.4146	-12.4069
733	-13.6829	-14.0469	-12.6564	-13.8834	-13.7145	-12.0799	-13.717	-13.2943	-11.9283	-12.9828	-13.2848	-12.2134	-12.9405	-13.4391	-11.7546	-12.6225	-13.5114	-13.436	-12.7083	-12.7928
734	-13.4214	-13.723	-12.0785	-13.2998	-12.8863	-11.3882	-12.9732	-12.6644	-11.4472	-12.3458	-12.7701	-11.5294	-12.1105	-12.7922	-11.1663	-12.0078	-12.8852	-12.8188	-11.9187	-13.1331
735	-13.0644	-13.2787	-11.4305	-12.6115	-11.9563	-10.6433	-12.1373	-11.9449	-10.902	-11.6246	-12.1683	-10.7794	-11.2079	-12.0482	-10.5334	-11.3226	-12.1743	-12.1061	-11.0659	-13.4162
736	-12.6173	-12.7239	-10.7276	-11.8362	-10.9517	-9.86269	-11.2315	-11.1546	-10.3061	-10.8382	-11.4935	-9.98285	-10.2565	-11.2273	-9.86936	-10.5835	-11.3956	-11.3166	-10.1712	-13.6306
737	-12.0891	-12.0727	-9.9865	-10.9942	-9.90096	-9.06391	-10.2793	-10.3139	-9.67332	-10.007	-10.7621	-9.1592	-9.28048	-10.3517	-9.18775	-9.80832	-10.5681	-10.4713	-9.25577	-13.7656
738	-11.4913	-11.3424	-9.22361	-10.1074	-8.83154	-8.26325	-9.30423	-9.4434	-9.01792	-9.15099	-9.99166	-8.32692	-8.30198	-9.44366	-8.50153	-9.01448	-9.71116	-9.59143	-8.33942	-13.812
739	-10.8377	-10.5524	-8.45469	-9.19728	-7.76826	-7.47524	-8.32819	-8.56299	-8.35331	-8.2892	-9.19956	-7.50258	-7.34061	-8.52464	-7.82254	-8.21835	-8.84363	-8.69773	-7.43954	-13.7626
740	-10.1434	-9.72284	-7.69396	-8.28406	-6.73219	-6.71214	-7.37034	-7.69045	-7.69181	-7.43851	-8.40236	-6.70027	-6.41256	-7.6138	-7.16106	-7.43447	-7.98268	-7.80892	-6.57064	-13.6128
741	-9.42365	-8.87353	-6.95364	-7.38556	-5.74007	-5.98374	-6.44651	-6.84102	-7.0442	-6.61317	-7.61493	-5.93137	-5.53034	-6.72745	-6.52562	-6.6751	-7.14317	-6.94112	-5.74402	-13.3616
742	-8.6934	-8.02277	-6.24371	-6.51666	-4.80424	-5.29733	-5.56893	-6.02695	-6.41947	-5.82451	-6.84993	-5.20447	-4.70286	-5.87865	-5.92294	-5.95005	-6.3372	-6.10747	-4.96786	-13.0113
743	-7.96634	-7.18665	-5.57181	-5.68899	-3.93285	-4.65789	-4.74628	-5.25752	-5.82477	-5.08095	-6.11762	-4.5255	-3.93573	-5.07714	-5.35793	-5.26663	-5.57407	-5.31795	-4.24742	-12.5679
744	-7.25452	-6.37854	-4.94338	-4.91102	-3.1304	-4.06828	-3.98397	-4.53907	-5.26543	-4.38815	-5.42575	-3.89801	-3.2317	-4.32954	-4.83386	-4.62983	-4.86028	-4.57951	-3.58542	-12.0407
745	-6.568	-5.60892	-4.3618	-4.18824	-2.39836	-3.5296	-3.28463	-3.87539	-4.7451	-3.74935	-4.77971	-3.32356	-2.59116	-3.63967	-4.35253	-4.04253	-4.19986	-3.8964	-2.98244	-11.4419
746	-5.91476	-4.88543	-3.82872	-3.52355	-1.73576	-3.04151	-2.64856	-3.26807	-4.2659	-3.16573	-4.18279	-2.80199	-2.01264	-3.00899	-3.9145	-3.50587	-3.59467	-3.27053	-2.4374	-10.7857
747	-5.3007	-4.21305	-3.34432	-2.9177	-1.13982	-2.60251	-2.07427	-2.71687	-3.82869	-2.63677	-3.63642	-2.33188	-1.49331	-2.43705	-3.51933	-3.0195	-3.04477	-2.70189	-1.94793	-10.0877
748	-4.72978	-3.59445	-2.90761	-2.36969	-0.606476	-2.21028	-1.55889	-2.22017	-3.43328	-2.1607	-3.14052	-1.91082	-1.02936	-1.92192	-3.1658	-2.58198	-2.54884	-2.18895	-1.51075	-9.36355
749	-4.20427	-3.03038	-2.51671	-1.87724	-0.130811	-1.86192	-1.09862	-1.7753	-3.07863	-1.73477	-2.69383	-1.53573	-0.616346	-1.4606	-2.85209	-2.191	-2.10449	-1.7291	-1.12197	-8.62848
750	-3.72497	-2.52001	-2.16914	-1.43711	0.292576	-1.55414	-0.689045	-1.37886	-2.7631	-1.35559	-2.29422	-1.20308	-0.249496	-1.04935	-2.57599	-1.84367	-1.70857	-1.31892	-0.777356	-7.89649
751	-3.29148	-2.06134	-1.86194	-1.04543	0.669302	-1.28345	-0.32541	-1.027	-2.4846	-1.01938	-1.93888	-0.909099	0.0761136	-0.683954	-2.33503	-1.53673	-1.35747	-0.954495	-0.472502	-7.17987
752	-2.9025	-1.6515	-1.59196	-0.697957	1.00499	-1.04634	-0.00283453	-0.71564	-2.24075	-0.722129	-1.62463	-0.649945	0.365372	-0.359987	-2.12661	-1.26672	-1.04728	-0.631628	-0.203014	-6.48881
753	-2.55601	-1.28705	-1.35591	-0.3903	1.30513	-0.8393	0.283529	-0.440589	-2.02904	-0.459783	-1.34805	-0.4218	0.623026	-0.0729494	-1.94812	-1.03013	-0.774007	-0.346032	0.0353992	-5.8314
754	-2.24954	-0.964177	-1.15052	-0.118038	1.57495	-0.658973	0.538384	-0.197724	-1.8469	-0.228353	-1.10563	-0.220971	0.8536	0.181586	-1.79698	-0.823469	-0.53367	-0.0934495	0.246839	-5.21357
755	-1.98028	-0.678921	-0.972613	0.123141	1.8194	-0.50217	0.766212	0.0169454	-1.69177	-0.0239918	-0.893882	-0.0439434	1.06135	0.407887	-1.67075	-0.643397	-0.322409	0.130242	0.435173	-4.63931
756	-1.7453	-0.427294	-0.819144	0.337372	2.04307	-0.365913	0.971223	0.20721	-1.56122	0.156944	-0.709442	0.112579	1.25022	0.609997	-1.56711	-0.486732	-0.136549	0.328969	0.604003	-4.11085
757	-1.5416	-0.20539	-0.687275	0.528552	2.25019	-0.247455	1.15733	0.376625	-1.45293	0.317862	-0.549103	0.251652	1.42388	0.791705	-1.48394	-0.350506	0.0273588	0.506416	0.756653	-3.62894
758	-1.36624	-0.00945953	-0.574373	0.700317	2.44466	-0.144286	1.32815	0.528483	-1.36477	0.461919	-0.409864	0.376086	1.58566	0.956522	-1.4193	-0.231978	0.172517	0.666009	0.896171	-3.19314
759	-1.21638	0.164037	-0.47803	0.856029	2.63002	-0.0541305	1.48698	0.665818	-1.29478	0.592012	-0.288948	0.488446	1.73864	1.10768	-1.37149	-0.128645	0.301868	0.8109	1.02534	-2.80206
760	-0.866266	-3.5376	-0.309162	2.31482	-0.681582	-2.81472	-3.58925	-2.35211	-2.53918	-4.03762	-1.86673	-1.60886	-3.16397	-2.00658	0.60596	0.0866763	-0.609987	0.704853	0.624901	-2.27693
761	-0.694993	-3.214	-0.0181803	2.10861	-0.416612	-2.59608	-3.04368	-1.94012	-2.23845	-3.52227	-1.64937	-1.33324	-2.82999	-1.54483	0.744205	0.128769	-0.661639	0.735263	0.601392	-2.17063
762	-0.548383	-2.94691	0.238842	1.9362	-0.184714	-2.41709	-2.55562	-1.57346	-1.97554	-3.06093	-1.45898	-1.0886	-2.53553	-1.13517	0.869833	0.16641	-0.710058	0.764954	0.584603	-2.08619
763	-0.422953	-2.72997	0.467466	1.79412	0.0190343	-2.27362	-2.12158	-1.24862	-1.74724	-2.65077	-1.29335	-0.872402	-2.27795	-0.772729	0.985263	0.200263	-0.756208	0.794571	0.573965	-2.02198
764	-0.315597	-2.5575	0.672712	1.6792	0.199096	-2.16197	-1.73754	-0.961873	-1.55038	-2.28841	-1.15029	-0.681993	-2.05443	-0.452566	1.09273	0.230955	-0.800982	0.824706	0.56899	-1.9765
765	-0.223569	-2.42449	0.859087	1.58861	0.359493	-2.07886	-1.39918	-0.709418	-1.38191	-1.97016	-1.02766	-0.514736	-1.86216	-0.169794	1.19429	0.259073	-0.845204	0.85591	0.569267	-1.94844
766	-0.144447	-2.32657	1.03063	1.5198	0.50383	-2.02145	-1.10211	-0.487509	-1.23889	-1.6922	-0.9234	-0.368054	-1.69837	0.0802992	1.29182	0.285166	-0.889639	0.888696	0.574461	-1.93663
767	-0.0761081	-2.25995	1.19095	1.47058	0.635333	-1.98728	-0.841948	-0.292525	-1.11861	-1.45071	-0.835601	-0.239479	-1.56039	0.302184	1.38705	0.30974	-0.935003	0.923551	0.584309	-1.94009
768	-0.0166991	-2.22144	1.34328	1.43903	0.75688	-1.97428	-0.614464	-0.121026	-1.01857	-1.24194	-0.76249	-0.126688	-1.44572	0.50004	1.48159	0.333263	-0.981965	0.960937	0.598619	-1.95801
769	0.0353958	-2.20835	1.49054	1.42354	0.871044	-1.98074	-0.415642	0.030204	-0.936497	-1.06234	-0.702453	-0.0275154	-1.35206	0.677741	1.5769	0.356169	-1.03116	1.0013	0.617262	-1.98975
770	0.0815817	-2.21848	1.63534	1.42275	0.980127	-2.00527	-0.241726	0.164146	-0.870356	-0.908571	-0.654038	0.0600328	-1.27731	0.838841	1.67437	0.378858	-1.08321	1.0451	0.640173	-2.03485
771	0.123081	-2.25005	1.78007	1.43555	1.0862	-2.04678	-0.089242	0.283536	-0.818341	-0.777551	-0.615952	0.13778	-1.21957	0.986587	1.77528	0.401702	-1.13871	1.09275	0.667348	-2.09299
772	0.160957	-2.30168	1.92693	1.46109	1.19115	-2.10449	0.0449907	0.390864	-0.778869	-0.666457	-0.58706	0.207381	-1.17717	1.12393	1.88088	0.425049	-1.19824	1.14473	0.69884	-2.16403
773	0.196138	-2.37237	2.07795	1.49871	1.29667	-2.17783	0.163862	0.488392	-0.750568	-0.572739	-0.566377	0.270333	-1.14866	1.25356	1.99234	0.44923	-1.26239	1.20148	0.734756	-2.24795
774	0.229438	-2.46142	2.23502	1.54795	1.40436	-2.26652	0.269982	0.578163	-0.732264	-0.494112	-0.553056	0.327986	-1.13279	1.37791	2.11084	0.474558	-1.33177	1.2635	0.775262	-2.34491
775	0.261575	-2.56844	2.39998	1.60856	1.5157	-2.37048	0.365699	0.662022	-0.722969	-0.428547	-0.546384	0.381552	-1.12851	1.49919	2.23752	0.501341	-1.407	1.3313	0.820575	-2.4552
776	0.293188	-2.69331	2.57457	1.68044	1.63208	-2.48982	0.453115	0.741635	-0.721863	-0.374258	-0.545771	0.432125	-1.13494	1.61944	2.37352	0.529876	-1.48872	1.40542	0.870968	-2.57923
777	0.324853	-2.83615	2.76051	1.76365	1.75488	-2.62487	0.534116	0.81851	-0.728283	-0.329678	-0.550736	0.480692	-1.15141	1.74052	2.52001	0.560464	-1.57761	1.48644	0.92677	-2.71755
778	0.357097	-2.99733	2.95949	1.85843	1.88541	-2.77613	0.610392	0.894019	-0.741708	-0.29345	-0.560905	0.528146	-1.17737	1.86416	2.67819	0.593407	-1.67438	1.57499	0.988365	-2.87085
779	0.390407	-3.17739	3.17322	1.96515	2.02499	-2.94426	0.683459	0.96942	-0.76175	-0.264401	-0.575998	0.575305	-1.21246	1.99199	2.84927	0.629016	-1.77982	1.67175	1.0562	-3.03992
780	0.425245	-3.37709	3.4034	2.08431	2.17496	-3.13009	0.754689	1.04587	-0.788138	-0.241524	-0.595822	0.62292	-1.25644	2.12554	3.03454	0.667615	-1.89473	1.77745	1.13078	-3.2257
781	0.462056	-3.59736	3.65179	2.21655	2.33667	-3.3346	0.825327	1.12446	-0.820716	-0.223966	-0.620266	0.671692	-1.30922	2.26631	3.23533	0.709542	-2.02	1.89291	1.21267	-3.4292
782	0.501278	-3.83928	3.92014	2.36267	2.51153	-3.55891	0.896516	1.20622	-0.859427	-0.211005	-0.649294	0.722284	-1.37083	2.41571	3.45301	0.755159	-2.1566	2.01899	1.30252	-3.65159
783	0.543348	-4.10406	4.21026	2.52356	2.701	-3.80425	0.969317	1.29214	-0.904313	-0.202036	-0.682943	0.775331	-1.44141	2.5752	3.68904	0.804852	-2.30556	2.15664	1.40104	-3.8941
784	0.588713	-4.39305	4.52396	2.70027	2.90659	-4.072	1.04473	1.38317	-0.955505	-0.196559	-0.721316	0.831449	-1.52123	2.74617	3.94492	0.859036	-2.468	2.30689	1.50903	-4.15806
785	0.637835	-4.70767	4.86309	2.89397	3.1299	-4.3636	1.1237	1.48028	-1.01322	-0.194165	-0.76458	0.891253	-1.61068	2.93006	4.22221	0.918161	-2.64512	2.47086	1.62736	-4.44488
786	0.691199	-5.04941	5.22944	3.10594	3.37263	-4.6806	1.20716	1.58444	-1.07777	-0.194525	-0.812968	0.955359	-1.71024	3.12833	4.52251	0.982717	-2.83823	2.64977	1.757	-4.75603
787	0.74932	-5.41978	5.62477	3.33762	3.63654	-5.02457	1.29601	1.69661	-1.14953	-0.197379	-0.866772	1.02439	-1.8205	3.34248	4.84744	1.05324	-3.04872	2.84492	1.89903	-5.093
788	0.812749	-5.82023	6.05072	3.59053	3.92347	-5.39709	1.39118	1.81782	-1.22898	-0.202531	-0.92635	1.09901	-1.94219	3.57403	5.19863	1.1303	-3.27811	3.05774	2.05462	-5.45725
789	0.882081	-6.25214	6.50875	3.86634	4.23536	-5.79972	1.4936	1.94912	-1.31667	-0.209836	-0.992123	1.1799	-2.0761	3.82456	5.57766	1.21456	-3.52799	3.28974	2.22505	-5.8502
790	0.957961	-6.71669	7.00003	4.16678	4.57418	-6.2339	1.60421	2.09162	-1.41323	-0.219201	-1.06458	1.26777	-2.22318	4.0957	5.98601	1.3067	-3.80006	3.54255	2.41174	-6.27316
791	1.04109	-7.21473	7.52535	4.4937	4.94195	-6.70085	1.72402	2.24652	-1.51941	-0.230575	-1.14427	1.3634	-2.38446	4.3891	6.42501	1.40749	-4.09612	3.81789	2.61621	-6.72723
792	1.13224	-7.74672	8.08491	4.849	5.34071	-7.20152	1.85408	2.41505	-1.63602	-0.243944	-1.23182	1.46762	-2.56111	4.70644	6.89575	1.51777	-4.41803	4.11759	2.84015	-7.21317
793	1.23225	-8.31248	8.67817	5.23458	5.77242	-7.7364	1.99551	2.59856	-1.76399	-0.259332	-1.32795	1.58131	-2.75439	5.04941	7.39896	1.63847	-4.76772	4.44353	3.08534	-7.73137
794	1.34205	-8.91103	9.30363	5.65235	6.23893	-8.30538	2.14949	2.79848	-1.90433	-0.276798	-1.43343	1.70544	-2.96572	5.41966	7.93484	1.7706	-5.14715	4.79766	3.35375	-8.28157
795	1.46264	-9.54034	9.95851	6.10412	6.74186	-8.90753	2.3173	3.01634	-2.05818	-0.296429	-1.54914	1.84107	-3.19661	5.81876	8.50296	1.91526	-5.55823	5.18197	3.64744	-8.86276
796	1.59514	-10.197	10.6385	6.5915	7.28252	-9.54085	2.50029	3.25378	-2.22679	-0.318345	-1.67604	1.98933	-3.44871	6.24817	9.10198	2.07368	-6.00283	5.5984	3.96864	-9.47292
797	1.74078	-10.8761	11.3374	7.11582	7.86167	-10.202	2.69995	3.51252	-2.41153	-0.342696	-1.81521	2.15145	-3.72376	6.70911	9.72947	2.24717	-6.48262	6.04881	4.31968	-10.1088
798	1.9009	-11.5706	12.0467	7.67798	8.47941	-10.886	2.91784	3.79441	-2.61389	-0.369664	-1.96781	2.32879	-4.02364	7.20249	10.3816	2.43718	-6.99903	6.53492	4.70299	-10.7655
799	2.07697	-12.2713	12.7555	8.27822	9.13485	-11.5858	3.15564	4.10139	-2.83552	-0.399458	-2.13515	2.5228	-4.35031	7.72878	11.0528	2.64528	-7.55307	7.05811	5.12107	-11.4364
800	-17.3202	-14.4024	-15.9708	-17.3281	-16.0323	-15.9131	-15.6403	-13.5639	-15.0041	-16.2939	-15.8607	-15.9741	-17.7991	-18.2173	-14.906	-16.2125	-14.5558	-16.7777	-17.0502	-9.74052
801	-17.5498	-14.8335	-16.3332	-17.3711	-16.3817	-16.4544	-15.8607	-14.1215	-15.4428	-16.6693	-16.4125	-16.3843	-17.9415	-18.5484	-15.5811	-16.6826	-15.1196	-17.1697	-17.2469	-9.80021
802	-17.8709	-15.2986	-16.7003	-17.5114	-16.7932	-17.0328	-16.113	-14.6867	-15.898	-17.0858	-16.9325	-16.8492	-18.1414	-18.9263	-16.2468	-17.2059	-15.7192	-17.5801	-17.5158	-9.96132
803	-18.2247	-15.7647	-17.0319	-17.6948	-17.22	-17.6009	-16.36	-15.2331	-16.3342	-17.4963	-17.3807	-17.3216	-18.3428	-19.2858	-16.866	-17.7323	-16.3183	-17.9594	-17.804	-10.2077
804	-18.5549	-16.1988	-17.2895	-17.8711	-17.6161	-18.1101	-16.5668	-15.7329	-16.7159	-17.8541	-17.717	-17.755	-18.4931	-19.5641	-17.3998	-18.2111	-16.8788	-18.2595	-18.0613	-10.5248
805	-18.8072	-16.5676	-17.4366	-17.9935	-17.9362	-18.5114	-16.7008	-16.1571	-17.0083	-18.1143	-17.9033	-18.1032	-18.5446	-19.702	-17.8079	-18.5918	-17.3613	-18.4347	-18.2401	-10.8994
806	-18.9313	-16.8387	-17.4412	-18.02	-18.1373	-18.7575	-16.7326	-16.4769	-17.1783	-18.2351	-17.9059	-18.3217	-18.4558	-19.6472	-18.0513	-18.8256	-17.726	-18.4441	-18.2973	-11.3187
807	-18.8825	-16.9817	-17.2774	-17.9143	-18.1803	-18.805	-16.6375	-16.6646	-17.1967	-18.1802	-17.6983	-18.3703	-18.1934	-19.3579	-18.0948	-18.8682	-17.9348	-18.2544	-18.1957	-11.7699
808	-18.6253	-16.9699	-16.9273	-17.648	-18.033	-18.6189	-16.3972	-16.6958	-17.0402	-17.9213	-17.2648	-18.2159	-17.7352	-18.8069	-17.9106	-18.6833	-17.9536	-17.8429	-17.9068	-12.2398
809	-18.1366	-16.783	-16.3837	-17.2024	-17.6727	-18.1761	-16.0007	-16.5514	-16.6936	-17.4417	-16.6022	-17.8353	-17.0716	-17.9853	-17.482	-18.2465	-17.7558	-17.2004	-17.413	-12.7148
810	-17.4083	-16.4087	-15.6505	-16.5703	-17.089	-17.469	-15.4454	-16.2198	-16.1514	-16.7378	-15.7213	-17.2187	-16.2074	-16.904	-16.8056	-17.5489	-17.3252	-16.3326	-16.71	-13.1798
811	-16.4486	-15.8445	-14.7429	-15.7567	-16.2852	-16.5073	-14.7381	-15.6985	-15.4196	-15.8204	-14.6461	-16.3713	-15.1604	-15.5929	-15.8933	-16.5988	-16.6589	-15.2598	-15.8069	-13.6194
812	-15.2818	-15.0983	-13.6861	-14.7782	-15.2789	-15.3177	-13.8935	-14.9949	-14.5148	-14.7139	-13.4119	-15.3129	-13.9602	-14.0974	-14.7718	-15.4215	-15.7681	-14.0151	-14.7259	-14.0167
813	-13.9452	-14.1882	-12.5126	-13.661	-14.1	-13.9414	-12.9336	-14.1263	-13.463	-13.4536	-12.0611	-14.0767	-12.6445	-12.4725	-13.4795	-14.0568	-14.6778	-12.6408	-13.4996	-14.3549
814	-12.4851	-13.1409	-11.2592	-12.4387	-12.7875	-12.4291	-11.8855	-13.1183	-12.2972	-12.0821	-10.639	-12.705	-11.2551	-10.7765	-12.0629	-12.5545	-13.4244	-11.1834	-12.1676	-14.6169
815	-10.9512	-11.9892	-9.96332	-11.1482	-11.3856	-10.8351	-10.7785	-12.0024	-11.0542	-10.6446	-9.18983	-11.245	-9.83366	-9.0646	-10.5716	-10.9684	-12.0517	-9.68934	-10.7723	-14.7864
816	-9.3919	-10.7686	-8.66019	-9.82668	-9.93898	-9.21227	-9.64245	-10.8136	-9.77114	-9.18479	-7.75288	-9.74414	-8.41823	-7.38464	-9.0532	-9.35099	-10.6065	-8.20075	-9.3548	-14.8493
817	-7.85021	-9.51481	-7.38046	-8.50819	-8.48908	-7.60727	-8.50484	-9.5869	-8.48268	-7.74146	-6.36064	-8.24553	-7.04102	-5.77414	-7.55011	-7.749	-9.13416	-6.75299	-7.95198	-14.7939
818	-6.36115	-8.26047	-6.1489	-7.222	-7.07133	-6.05783	-7.38978	-8.35477	-7.21882	-6.34635	-5.03774	-6.78558	-5.72705	-4.25983	-6.09682	-6.20045	-7.67507	-5.37325	-6.59425	-14.6125
819	-4.95082	-7.03371	-4.98396	-5.99122	-5.71362	-4.59186	-6.31683	-7.1455	-6.00371	-5.02331	-3.80106	-5.39244	-4.49402	-2.85835	-4.71913	-4.73362	-6.26237	-4.08051	-5.30469	-14.3024
820	-3.63664	-5.85695	-3.898	-4.83258	-4.436	-3.22774	-5.30079	-5.98189	-4.85522	-3.78849	-2.66053	-4.08587	-3.35285	-1.57782	-3.43435	-3.36729	-4.92111	-2.88622	-4.09916	-13.8659
821	-2.42834	-4.74661	-2.89798	-3.75684	-3.2512	-1.97554	-4.35175	-4.88091	-3.78525	-2.65114	-1.6203	-2.87794	-2.30872	-0.419693	-2.25233	-2.11195	-3.66832	-1.79556	-2.98699	-13.3107
822	-1.32938	-3.7135	-1.98639	-2.76956	-2.16564	-0.838653	-3.47567	-3.85401	-2.80045	-1.61487	-0.68005	-1.77427	-1.3622	0.619366	-1.17681	-0.971316	-2.5139	-0.80878	-1.97206	-12.6495
823	-0.338488	-2.76348	-1.16225	-1.87205	-1.18073	0.184519	-2.67492	-2.90771	-1.90308	-0.678897	0.16384	-0.775392	-0.51046	1.54592	-0.206852	0.0559397	-1.46186	0.0774907	-1.05398	-11.8992
824	0.549006	-1.89837	-0.421998	-1.06239	-0.294092	1.09907	-1.94908	-2.04442	-1.09203	0.160749	0.917212	0.121875	0.251747	2.36845	0.661823	0.974722	-0.51168	0.869096	-0.229218	-11.0796
825	1.33998	-1.1168	0.239703	-0.336304	0.499313	1.91233	-1.29555	-1.26332	-0.363711	0.910172	1.5873	0.923289	0.931211	3.09643	1.4357	1.79223	0.340487	1.57342	0.507895	-10.2119
826	2.04261	-0.41511	0.829299	0.312054	1.20625	2.63288	-0.710224	-0.56122	0.287207	1.57679	2.18206	1.63621	1.5356	3.73961	2.12258	2.51698	1.1007	2.19868	1.16439	-9.31751
827	2.66569	0.21195	1.35384	0.889488	1.83446	3.26984	-0.187938	0.0667517	0.867116	2.16869	2.70971	2.26885	2.07294	4.30754	2.73093	3.15806	1.7764	2.75338	1.74804	-8.41653
828	3.21811	0.770632	1.8206	1.40328	2.39214	3.83239	0.277059	0.626544	1.38299	2.69417	3.17837	2.82977	2.55128	4.80931	3.26933	3.72463	2.3757	3.24596	2.26686	-7.52693
829	3.70854	1.26772	2.2368	1.86082	2.88753	4.32937	0.690807	1.12471	1.84202	3.1614	3.59585	3.32744	2.97841	5.25332	3.74621	4.22557	2.90696	3.68453	2.72881	-6.66388
830	4.1452	1.71018	2.60939	2.2694	3.3286	4.76913	1.05939	1.56803	2.25132	3.57819	3.96947	3.77003	3.36173	5.64725	4.1696	4.66926	3.37841	4.07669	3.14155	-5.83942
831	4.53573	2.1049	2.94497	2.63596	3.72294	5.15936	1.38875	1.96328	2.61776	3.95187	4.30602	4.16519	3.7081	5.99797	4.54696	5.06344	3.79792	4.42948	3.51232	-5.06246
832	4.88711	2.45854	3.24967	2.96706	4.0776	5.50705	1.68459	2.31703	2.94785	4.28922	4.61168	4.52002	4.02385	6.31157	4.88517	5.41515	4.17289	4.74933	3.84781	-4.33892
833	5.20564	2.77739	3.52916	3.26878	4.39905	5.81849	1.95228	2.63553	3.24763	4.5964	4.89205	4.84098	4.31471	6.5934	5.19043	5.73072	4.51012	5.042	4.15418	-3.67217
834	5.49696	3.06733	3.78859	3.5467	4.69317	6.09926	2.19682	2.9246	3.52269	4.87897	5.15211	5.13389	4.58585	6.84812	5.46833	6.01579	4.81583	5.31266	4.43697	-3.06333
835	5.76605	3.33374	4.03261	3.80588	4.96522	6.35425	2.42283	3.18965	3.7781	5.14188	5.3963	5.40393	4.84188	7.07972	5.72382	6.27529	5.09558	5.56585	4.70118	-2.51177
836	6.01725	3.58159	4.26543	4.0509	5.21988	6.58774	2.63453	3.43563	4.01848	5.38953	5.6285	5.65569	5.08687	7.29159	5.96123	6.51354	5.35438	5.80555	4.95126	-2.01549
837	6.25434	3.81534	4.49078	4.28588	5.46129	6.80341	2.83578	3.66702	4.24796	5.62577	5.85208	5.89318	5.32442	7.4866	6.18436	6.73425	5.5966	6.03523	5.19115	-1.57149
838	6.48054	4.03903	4.71201	4.51447	5.69307	7.00439	3.03008	3.8879	4.47025	5.85393	6.06998	6.11986	5.55764	7.66713	6.39648	6.9406	5.82611	6.25784	5.42428	-1.1761
839	6.69857	4.25629	4.93207	4.73994	5.91833	7.19333	3.22063	4.10191	4.68863	6.0769	6.28465	6.33871	5.78925	7.83509	6.60034	7.13525	6.04625	6.47589	5.65364	-0.825244
840	5.45392	9.0178	6.19182	7.82216	6.97843	9.59742	8.96774	7.42028	7.82535	8.92369	7.0823	3.00355	-0.497947	2.07452	1.82173	0.481283	4.73763	1.3	2.733	1.13753
841	5.87727	9.26785	6.5824	8.0911	7.08007	9.57805	9.06169	7.76264	8.00073	9.03853	7.34176	2.83659	-0.0511478	2.17117	2.05557	0.926256	4.48381	1.56606	2.86971	1.27507
842	6.2952	9.54746	6.9688	8.35703	7.23399	9.63713	9.18192	8.10851	8.19081	9.16601	7.6034	2.69092	0.345553	2.26367	2.27088	1.32439	4.27737	1.80711	2.99317	1.40121
843	6.71145	9.85044	7.35347	8.61964	7.43479	9.7621	9.32339	8.45759	8.39355	9.30275	7.86751	2.5659	0.698483	2.35402	2.47171	1.68334	4.11434	2.02769	3.10661	1.51841
844	7.12889	10.1706	7.73805	8.87818	7.67775	9.94177	9.48137	8.80899	8.60685	9.44549	8.13398	2.46073	1.01371	2.44406	2.6618	2.0101	3.99107	2.23197	3.21299	1.62898
845	7.54958	10.5015	8.12344	9.13148	7.95865	10.1659	9.65131	9.16122	8.82849	9.59103	8.40233	2.37453	1.29698	2.53546	2.84454	2.31104	3.9043	2.4238	3.31501	1.73501
846	7.97475	10.8364	8.50982	9.37801	8.27353	10.4251	9.82878	9.51215	9.05609	9.73622	8.67164	2.3064	1.5536	2.62977	3.02303	2.59193	3.85112	2.60669	3.41507	1.83846
847	8.40481	11.1682	8.89656	9.61586	8.61856	10.7101	10.0094	9.85902	9.28706	9.87795	8.94065	2.25545	1.78851	2.72841	3.20007	2.85796	3.82903	2.78384	3.51538	1.94111
848	8.8393	11.4896	9.28232	9.84278	8.98984	11.012	10.189	10.1985	9.51864	10.0131	9.20766	2.22083	2.00622	2.83271	3.37822	3.1138	3.83585	2.95814	3.61791	2.04462
849	9.27691	11.7925	9.66497	10.0563	9.38322	11.3219	10.3631	10.5265	9.74783	10.1388	9.47064	2.20176	2.21084	2.9439	3.55984	3.36362	3.86978	3.13227	3.72443	2.15052
850	9.71538	12.069	10.0416	10.2536	9.79414	11.6306	10.5275	10.8385	9.97145	10.252	9.72716	2.19753	2.4061	3.06318	3.74706	3.6112	3.92933	3.30866	3.83658	2.26026
851	10.1515	12.3107	10.4086	10.4319	10.2175	11.9288	10.6782	11.1296	10.1861	10.3499	9.97444	2.20756	2.59541	3.19168	3.94187	3.8599	4.01331	3.48951	3.9558	2.3752
852	10.5812	12.5094	10.7615	10.5883	10.6475	12.2071	10.811	11.3942	10.3882	10.43	10.2094	2.23137	2.78185	3.33051	4.14609	4.11277	4.12083	3.6769	4.08344	2.49662
853	10.9991	12.6573	11.0954	10.7197	11.0776	12.456	10.922	11.6267	10.5742	10.4898	10.4288	2.26858	2.96823	3.48074	4.36143	4.37256	4.25124	3.87273	4.22074	2.62578
854	11.3993	12.7474	11.4044	10.8235	11.5002	12.666	11.0078	11.8213	10.7403	10.5273	10.6289	2.31894	3.15713	3.64345	4.58947	4.64173	4.40413	4.07877	4.36885	2.7639
855	11.7748	12.7735	11.6827	10.8969	11.9071	12.8282	11.065	11.9726	10.8828	10.5407	10.8064	2.38234	3.35091	3.81971	4.83168	4.92253	4.57929	4.29668	4.52883	2.91218
856	12.1178	12.7311	11.9238	10.938	12.2891	12.9342	11.091	12.0754	10.9983	10.5288	10.9574	2.45876	3.55175	4.01061	5.08943	5.21694	4.77669	4.52803	4.70168	3.07183
857	12.4202	12.6173	12.1213	10.9448	12.6364	12.9767	11.0835	12.1251	11.0834	10.4907	11.0785	2.54834	3.76169	4.21722	5.36397	5.52675	4.99643	4.77427	4.88833	3.24406
858	12.6733	12.4314	12.2692	10.9164	12.9386	12.9501	11.0412	12.1184	11.1354	10.426	11.1666	2.65129	3.98264	4.44064	5.65644	5.85351	5.23873	5.03679	5.08967	3.43009
859	12.8689	12.1747	12.3617	10.8521	13.1853	12.8502	10.9632	12.0529	11.1519	10.335	11.2187	2.76799	4.21639	4.68194	5.96783	6.19852	5.5039	5.31686	5.30652	3.63119
860	12.999	11.8509	12.3942	10.7521	13.3664	12.6754	10.8496	11.9276	11.1311	10.2184	11.2325	2.8989	4.46464	4.94222	6.29898	6.56282	5.79226	5.61565	5.53961	3.84863
861	13.0567	11.4656	12.3631	10.6175	13.4726	12.4261	10.7012	11.7433	11.072	10.0774	11.2064	3.04461	4.72899	5.22251	6.65049	6.94714	6.10414	5.93417	5.78962	4.08372
862	13.0367	11.0263	12.2664	10.4498	13.4961	12.1054	10.5198	11.5022	10.9744	9.91383	11.1396	3.20581	5.01096	5.52384	7.02273	7.35182	6.43978	6.27331	6.05711	4.33779
863	12.9355	10.542	12.1037	10.2516	13.4311	11.7185	10.3078	11.208	10.839	9.72982	11.0321	3.38333	5.31195	5.84712	7.41574	7.77678	6.79932	6.63372	6.34253	4.6122
864	12.7518	10.0226	11.8763	10.0258	13.2743	11.2728	10.0683	10.866	10.6673	9.52799	10.8847	3.57804	5.63327	6.19317	7.82916	8.22142	7.18268	7.0158	6.64616	4.90828
865	12.487	9.47851	11.5877	9.77594	13.0251	10.7774	9.80505	10.4826	10.4616	9.31122	10.6993	3.79098	5.97606	6.56262	8.26214	8.68451	7.58948	7.41963	6.9681	5.22738
866	12.1449	8.92009	11.2428	9.5061	12.6864	10.2426	9.52207	10.0652	10.225	9.08259	10.4785	4.02321	6.34131	6.95591	8.71327	9.16407	8.01898	7.84488	7.30819	5.57076
867	11.7319	8.35729	10.8482	9.22053	12.2641	9.6793	9.22383	9.62165	9.96122	8.84534	10.2259	4.27592	6.72974	7.37313	9.18041	9.65726	8.46995	8.2907	7.66599	5.93962
868	11.2567	7.79926	10.4118	8.92366	11.7667	9.09856	8.9149	9.16019	9.67461	8.60271	9.94567	4.55032	7.14181	7.814	9.66063	10.1603	8.94049	8.75566	8.04067	6.335
869	10.7295	7.25407	9.94226	8.61994	11.2054	8.51108	8.59984	8.68888	9.36977	8.35792	9.64237	4.8477	7.57759	8.27772	10.15	10.6681	9.42801	9.23757	8.43098	6.75773
870	10.1619	6.72856	9.44873	8.31367	10.593	7.92675	8.28306	8.21544	9.05157	8.11405	9.32106	5.16933	8.03666	8.76287	10.6437	11.1746	9.92896	9.73338	8.83514	7.20835
871	9.56578	6.22828	8.94044	8.00899	9.94331	7.35435	7.96875	7.74695	8.7249	7.874	8.98694	5.51649	8.51804	9.26726	11.1354	11.6723	10.4388	10.239	9.25078	7.68697
872	8.95333	5.75748	8.42628	7.70967	9.27044	6.80138	7.66077	7.28973	8.39456	7.64046	8.64518	5.89038	9.01998	9.78774	11.6179	12.1524	10.9518	10.7493	9.67481	8.19319
873	8.33596	5.31922	7.91453	7.41915	8.58794	6.27392	7.36255	6.84917	8.06512	7.41582	8.30083	6.29207	9.5399	10.3201	12.0826	12.6046	11.4608	11.2578	10.1034	8.7259
874	7.72417	4.91544	7.4126	7.14042	7.9083	5.77669	7.0771	6.42973	7.74079	7.20221	7.95863	6.72245	10.0742	10.859	12.5197	13.018	11.9577	11.7568	10.5318	9.28313
875	7.12709	4.54715	6.9269	6.87608	7.24256	5.31306	6.80697	6.03491	7.4254	7.00146	7.62292	7.18212	10.6179	11.3974	12.9184	13.3802	12.4325	12.2371	10.9546	9.86186
876	6.55241	4.21453	6.46272	6.62824	6.59997	4.88521	6.55427	5.66731	7.12227	6.8151	7.29757	7.67127	11.165	11.9271	13.2671	13.6789	12.8744	12.6883	11.3651	10.4577
877	6.00625	3.91716	6.02426	6.39863	5.98792	4.49428	6.32064	5.32874	6.83426	6.64437	6.98594	8.18956	11.7076	12.4383	13.554	13.9017	13.2713	13.099	11.756	11.065
878	5.49317	3.65408	5.61465	6.18856	5.41196	4.14052	6.10736	5.02024	6.56372	6.49028	6.69085	8.73594	12.2367	12.9196	13.7672	14.037	13.6104	13.4568	12.1192	11.6759
879	5.01636	3.42398	5.23603	5.99901	4.87588	3.82348	5.9153	4.74227	6.31252	6.35358	6.4146	9.30846	12.7413	13.3583	13.8958	14.0749	13.879	13.749	12.4458	12.2812
880	15.4276	16.595	19.4679	15.8982	19.7073	16.0297	19.0947	16.1084	19.3072	17.6916	18.5101	17.0617	17.7113	17.2884	17.0293	17.7115	18.2345	18.081	11.0089	9.82102
881	16.1313	17.115	19.6559	16.1919	19.7106	16.3693	19.31	16.7426	19.5464	17.9192	18.5447	17.4657	18.0723	17.3948	17.4976	17.9215	18.3631	18.7871	10.8673	9.89075
882	16.5638	17.318	19.5547	16.2108	19.4916	16.4489	19.2204	17.062	19.4383	17.8152	18.2988	17.56	18.1654	17.196	17.682	17.8357	18.2015	19.1781	10.6507	9.85437
883	16.7071	17.1884	19.1333	15.9504	19.0179	16.2593	18.7994	17.0499	18.958	17.3703	17.7587	17.3295	17.9662	16.6892	17.5617	17.4409	17.735	19.2139	10.3673	9.72241
884	16.5506	16.7231	18.3799	15.4171	18.275	15.8015	18.0396	16.7006	18.1026	16.5921	16.9281	16.7728	17.4638	15.8869	17.1278	16.7393	16.9657	18.8676	10.0263	9.50621
885	16.0945	15.9356	17.3053	14.6301	17.2674	15.0886	16.9561	16.0233	16.8948	15.5079	15.8292	15.9056	16.6637	14.8184	16.387	15.7508	15.9142	18.1326	9.63736	9.21776
886	15.3532	14.8572	15.9435	13.6206	16.0197	14.1467	15.5864	15.0448	15.3822	14.1634	14.5012	14.7616	15.5897	13.5273	15.3637	14.5127	14.6189	17.0269	9.21087	8.86953
887	14.3557	13.5352	14.3483	12.4304	14.573	13.0128	13.9866	13.8078	13.6322	12.6177	12.9963	13.3897	14.2822	12.0679	14.0986	13.0758	13.1317	15.5941	8.75712	8.47405
888	13.1439	12.0283	12.5862	11.1073	12.98	11.7319	12.2247	12.3682	11.7233	10.9373	11.3736	11.8493	12.7941	10.4993	12.6447	11.4992	11.513	13.8993	8.28615	8.04366
889	11.769	10.4008	10.7284	9.70162	11.2988	10.3529	10.3724	10.7887	9.73547	9.18909	9.69247	10.2039	11.1851	8.87945	11.0622	9.84422	9.8242	12.0209	7.80738	7.59009
890	10.2864	8.71581	8.84264	8.26118	9.58601	8.92398	8.49697	9.13298	7.74173	7.43357	8.00751	8.51493	9.51535	7.26035	9.41165	8.16795	8.1223	10.0409	7.32942	7.12421
891	8.7507	7.02983	6.98745	6.82835	7.89191	7.48899	6.65596	7.45939	5.80205	5.72113	6.36428	6.83634	7.83963	5.68503	7.74902	6.51947	6.4556	8.03624	6.85984	6.65577
892	7.21105	5.38947	5.20851	5.43784	6.25724	6.08497	4.89392	5.81738	3.9611	4.08999	4.79764	5.2119	6.20396	4.18603	6.12133	4.9373	4.8615	6.07151	6.40507	6.19325
893	5.70852	3.82983	3.53797	4.11587	4.71192	4.74077	3.24191	4.2453	2.24845	2.56632	3.33162	3.6739	4.64357	2.78562	4.56496	3.44893	3.36621	4.19609	5.97038	5.74376
894	4.27457	2.37476	1.99555	2.88042	3.27546	3.47696	1.71874	2.7702	0.68063	1.16561	1.98055	2.24374	3.18282	1.49696	3.10541	2.07169	1.98578	2.44375	5.55988	5.31306
895	2.93117	1.03829	0.590665	1.7422	1.95831	2.30654	0.33321	1.40893	-0.736008	-0.10528	0.750768	0.933399	1.83635	0.325825	1.75836	0.814356	0.727837	0.834445	5.17662	4.90561
896	1.69177	-0.173512	-0.675039	0.705878	0.763713	1.23611	-0.913442	0.169853	-2.00239	-1.24591	-0.357458	-0.252604	0.610806	-0.72767	0.531318	-0.320906	-0.406472	-0.622894	4.82266	4.52462
897	0.562748	-1.26051	-1.80537	-0.228481	-0.310435	0.267171	-2.02521	-0.945115	-3.1242	-2.26032	-1.34815	-1.31526	-0.493279	-1.66736	-0.574439	-1.33674	-1.42059	-1.92738	4.49921	4.17227
898	-0.454983	-2.22669	-2.80761	-1.06419	-1.26989	-0.602534	-3.00938	-1.93872	-4.1099	-3.1554	-2.22812	-2.25936	-1.47968	-2.49971	-1.56211	-2.239	-2.32098	-3.08347	4.20677	3.84977
899	-1.36444	-3.07875	-3.69098	-1.80685	-2.12267	-1.3779	-3.87512	-2.81678	-4.9693	-3.93967	-3.00584	-3.09207	-2.355	-3.23269	-2.43785	-3.0355	-3.11593	-4.09889	3.94524	3.55757
900	-2.17132	-3.82486	-4.46554	-2.46347	-2.87807	-2.06551	-4.63233	-3.58698	-5.71258	-4.62233	-3.69052	-3.82189	-3.12752	-3.87505	-3.20959	-3.73508	-3.81458	-4.98298	3.71406	3.29548
901	-2.88294	-4.47395	-5.14146	-3.04182	-3.54579	-2.67292	-5.29103	-4.25795	-6.34966	-5.21275	-4.29155	-4.45787	-3.8063	-4.43568	-3.88616	-4.34692	-4.42631	-5.74572	3.51234	3.06283
902	-3.5075	-5.03508	-5.72854	-3.54992	-4.13551	-3.20812	-5.86084	-4.83866	-6.88991	-5.71999	-4.81806	-5.0091	-4.40059	-4.92332	-4.47665	-4.88009	-4.96029	-6.39697	3.33892	2.85858
903	-4.0535	-5.51707	-6.23592	-3.99575	-4.65648	-3.67912	-6.35076	-5.33798	-7.34199	-6.15265	-5.27871	-5.48437	-4.91944	-5.34627	-4.99001	-5.34325	-5.42523	-6.94615	3.19253	2.68145
904	-4.52936	-5.92833	-6.67198	-4.38696	-5.11732	-4.09372	-6.76904	-5.7644	-7.71381	-6.5187	-5.6815	-5.892	-5.37142	-5.71227	-5.43474	-5.74453	-5.82922	-7.40204	3.07178	2.52999
905	-4.9432	-6.27669	-7.04426	-4.73077	-5.52593	-4.45928	-7.12317	-6.12592	-8.01256	-6.82547	-6.0337	-6.23968	-5.76449	-6.02843	-5.81883	-6.09138	-6.17965	-7.77276	2.9753	2.4027
906	-5.30263	-6.56939	-7.35952	-5.03386	-5.88943	-4.78271	-7.41986	-6.42996	-8.24485	-7.07964	-6.3419	-6.53446	-6.10593	-6.30121	-6.14959	-6.39056	-6.4832	-8.06578	2.90173	2.29805
907	-5.6147	-6.81302	-7.62379	-5.30236	-6.21414	-5.0703	-7.66515	-6.68334	-8.41677	-7.28729	-6.61194	-6.78276	-6.4023	-6.53643	-6.43368	-6.64819	-6.74585	-8.28804	2.8498	2.21453
908	-5.88585	-7.01362	-7.84239	-5.5418	-6.50564	-5.32779	-7.86444	-6.89226	-8.53402	-7.45393	-6.84899	-6.99038	-6.65951	-6.7393	-6.6771	-6.86971	-6.97291	-8.44603	2.81834	2.15075
909	-6.12192	-7.17663	-8.02011	-5.75714	-6.76878	-5.56034	-8.02258	-7.06239	-8.60198	-7.58456	-7.05762	-7.16254	-6.88279	-6.91447	-6.88521	-7.05997	-7.16909	-8.54591	2.8063	2.1054
910	-6.32814	-7.30699	-8.16119	-5.95281	-7.00774	-5.77253	-8.14397	-7.19886	-8.62581	-7.68373	-7.24178	-7.30395	-7.07676	-7.06604	-7.06283	-7.22328	-7.33852	-8.59357	2.81277	2.0773
911	-6.50919	-7.40917	-8.26946	-6.1327	-7.2261	-5.96843	-8.2326	-7.30631	-8.61049	-7.75555	-7.40493	-7.4188	-7.24551	-7.19763	-7.2142	-7.36341	-7.48485	-8.59472	2.837	2.06542
912	-6.6692	-7.48721	-8.34841	-6.30022	-7.42685	-6.15159	-8.29215	-7.38894	-8.56085	-7.80382	-7.55005	-7.51088	-7.3926	-7.31242	-7.3431	-7.48372	-7.61124	-8.55491	2.87837	2.06886
913	-6.81183	-7.54476	-8.40122	-6.45835	-7.61252	-6.3251	-8.32598	-7.45054	-8.4816	-7.83196	-7.67969	-7.58356	-7.52115	-7.41321	-7.45286	-7.58714	-7.72047	-8.47956	2.93644	2.08689
914	-6.94027	-7.58511	-8.43081	-6.60964	-7.78516	-6.49162	-8.33726	-7.49456	-8.3773	-7.84313	-7.79603	-7.63987	-7.63387	-7.50243	-7.54641	-7.67621	-7.81497	-8.37396	3.01092	2.11893
915	-7.05729	-7.61124	-8.43993	-6.75625	-7.94641	-6.65342	-8.32892	-7.52407	-8.25238	-7.84022	-7.90094	-7.68254	-7.73311	-7.58217	-7.62633	-7.7532	-7.89683	-8.24325	3.10166	2.16455
916	-7.1653	-7.62585	-8.43114	-6.90001	-8.09756	-6.81239	-8.30374	-7.54188	-8.11111	-7.82587	-7.99596	-7.71398	-7.82089	-7.65426	-7.69489	-7.82005	-7.96786	-8.09236	3.20866	2.22348
917	-7.26636	-7.63134	-8.40685	-7.04243	-8.23958	-6.9701	-8.26432	-7.55047	-7.95752	-7.80249	-8.08242	-7.73636	-7.89896	-7.72026	-7.75405	-7.87846	-8.02966	-7.92602	3.33208	2.2956
918	-7.36222	-7.6299	-8.36935	-7.18472	-8.37316	-7.1278	-8.21312	-7.55211	-7.79544	-7.7723	-8.16137	-7.75163	-7.96881	-7.7815	-7.80557	-7.92991	-8.08358	-7.74869	3.4722	2.38091
919	-7.45434	-7.62348	-8.32081	-7.32781	-8.49875	-7.28646	-8.15248	-7.54881	-7.62845	-7.73729	-8.23372	-7.7615	-8.03171	-7.8391	-7.85092	-7.97567	-8.1308	-7.56452	3.62942	2.47957
920	-0.105213	1.7811	0.558688	-0.650493	-2.32969	0.859921	0.804656	-0.926458	1.44462	0.995527	2.34764	0.856098	-1.53546	0.897789	-1.47886	-0.705574	-1.15519	2.00711	2.19804	0.607638
921	0.015651	1.58567	0.549923	-0.667341	-2.0495	0.693565	0.897451	-0.75063	1.38405	1.13205	2.32983	0.690509	-1.43565	0.929693	-1.47435	-0.710486	-0.860492	1.88266	2.06831	0.837817
922	0.122007	1.4351	0.549518	-0.690991	-1.82776	0.558134	0.990606	-0.606243	1.34789	1.26673	2.34433	0.555822	-1.3652	0.969897	-1.49041	-0.724231	-0.613036	1.79914	1.97984	1.04934
923	0.216851	1.3225	0.556635	-0.721158	-1.65557	0.448015	1.08562	-0.487826	1.33325	1.40198	2.38812	0.446414	-1.32024	1.01824	-1.52521	-0.746157	-0.404183	1.75101	1.92726	1.24712
924	0.302768	1.24215	0.570637	-0.75769	-1.52549	0.358572	1.18389	-0.390804	1.33778	1.53998	2.45889	0.357641	-1.29763	1.07471	-1.57741	-0.775805	-0.226648	1.73379	1.90622	1.43548
925	0.381994	1.18943	0.591057	-0.800555	-1.43133	0.285982	1.28672	-0.311363	1.35967	1.68275	2.55496	0.285678	-1.2948	1.13942	-1.64605	-0.812888	-0.0742914	1.74396	1.91322	1.61827
926	0.456474	1.16055	0.617581	-0.84983	-1.36799	0.227099	1.39539	-0.24633	1.39753	1.83219	2.67521	0.227384	-1.30976	1.21262	-1.73057	-0.857267	0.0580586	1.77878	1.94553	1.79888
927	0.527908	1.15252	0.650029	-0.905696	-1.33134	0.179342	1.51115	-0.19307	1.45036	1.99013	2.819	0.18018	-1.34096	1.29467	-1.83072	-0.908945	0.17476	1.83619	2.00108	1.98039
928	0.597798	1.16298	0.68834	-0.968429	-1.31803	0.140595	1.63522	-0.149405	1.51749	2.15834	2.98612	0.141958	-1.38724	1.38605	-1.94652	-0.968049	0.279496	1.91475	2.07834	2.16561
929	0.667484	1.19012	0.732566	-1.0384	-1.32541	0.109128	1.76887	-0.113533	1.59855	2.33859	3.17672	0.110991	-1.44783	1.48735	-2.07829	-1.03483	0.375387	2.0135	2.17631	2.35711
930	0.73818	1.23261	0.782856	-1.11607	-1.35143	0.0835247	1.91339	-0.0839652	1.69346	2.53264	3.39129	0.0858731	-1.52225	1.59929	-2.22656	-1.10963	0.465099	2.13193	2.2944	2.55731
931	0.811004	1.28953	0.839459	-1.20201	-1.39457	0.0626324	2.07013	-0.0594767	1.80236	2.7423	3.63061	0.0654568	-1.6103	1.72268	-2.39209	-1.19294	0.550922	2.26994	2.43242	2.76852
932	0.887002	1.3603	0.902711	-1.29685	-1.45373	0.0455097	2.24049	-0.0390573	1.92561	2.96942	3.89572	0.0488082	-1.71205	1.85845	-2.57586	-1.28532	0.634847	2.42776	2.59054	2.99295
933	0.967176	1.44467	0.97304	-1.40134	-1.52821	0.0313894	2.42597	-0.0218751	2.06381	3.21592	4.18786	0.035167	-1.82778	2.00767	-2.77905	-1.38746	0.718631	2.60596	2.7692	3.23277
934	1.0525	1.54266	1.05096	-1.51634	-1.61766	0.0196465	2.62815	-0.00724459	2.21773	3.48378	4.50849	0.0239152	-1.95799	2.17152	-3.00303	-1.50015	0.803847	2.80538	2.96915	3.49011
935	1.14396	1.65454	1.13708	-1.64278	-1.72201	0.00977127	2.84873	0.00540018	2.38832	3.77508	4.85918	0.0145497	-2.10338	2.3513	-3.24933	-1.62427	0.891932	3.02712	3.19139	3.76712
936	1.24252	1.78082	1.23209	-1.78173	-1.84148	0.00134727	3.08948	0.0165275	2.57673	4.09197	5.24159	0.00666101	-2.26483	2.54846	-3.51967	-1.76087	0.984226	3.27253	3.43713	4.06592
937	1.3492	1.92219	1.33679	-1.93437	-1.97654	-0.00596636	3.35234	0.0265265	2.78427	4.43666	5.65742	-8.5044e-05	-2.44342	2.76458	-3.81594	-1.91107	1.08201	3.54316	3.70782	4.38864
938	1.46506	2.07959	1.45207	-2.10199	-2.12787	-0.0124499	3.63934	0.0357226	3.01242	4.81142	6.10835	-0.00596174	-2.64038	3.00139	-4.14017	-2.07613	1.18653	3.84079	4.00508	4.73743
939	1.59122	2.25411	1.57892	-2.28604	-2.29639	-0.0183349	3.95261	0.0443902	3.26285	5.21852	6.59586	-0.0111936	-2.85714	3.26075	-4.49449	-2.25747	1.29902	4.16737	4.33068	5.11438
940	1.72884	2.44707	1.71847	-2.48807	-2.48321	-0.0238147	4.29441	0.0527633	3.53735	5.66022	7.12122	-0.0159664	-3.09529	3.54467	-4.88115	-2.45661	1.42076	4.52497	4.68653	5.52154
941	1.87921	2.65994	1.87195	-2.70981	-2.68964	-0.0290518	4.66707	0.0610442	3.8379	6.13865	7.68525	-0.020435	-3.35656	3.8553	-5.30244	-2.67525	1.55303	4.91582	5.07464	5.96085
942	2.04369	2.89439	2.04071	-2.95313	-2.91718	-0.0341853	5.07297	0.0694113	4.16657	6.65575	8.28816	-0.0247301	-3.64288	4.19492	-5.76063	-2.91523	1.69721	5.34217	5.49703	6.43407
943	2.22374	3.15229	2.22626	-3.22004	-3.16753	-0.039336	5.51449	0.0780246	4.52558	7.21314	8.92932	-0.0289636	-3.95629	4.5659	-6.2579	-3.17853	1.85473	5.80629	5.9557	6.94267
944	2.42098	3.43565	2.43024	-3.51273	-3.44254	-0.0446112	5.99397	0.0870316	4.91722	7.81194	9.60694	-0.0332333	-4.29898	4.97071	-6.79622	-3.46732	2.02713	6.31036	6.45252	7.48772
945	2.63711	3.74669	2.65446	-3.83352	-3.74425	-0.0501084	6.51356	0.0965714	5.34383	8.45254	10.3178	-0.0376262	-4.67324	5.41183	-7.3772	-3.7839	2.21605	6.85632	6.98911	8.06969
946	2.87399	4.08777	2.90088	-4.18488	-4.07485	-0.0559187	7.07514	0.106779	5.80772	9.13437	11.0567	-0.042222	-5.08143	5.89171	-8.0019	-4.13072	2.42327	7.44577	7.5667	8.68831
947	3.13364	4.46137	3.17161	-4.56941	-4.43667	-0.0621293	7.68014	0.117787	6.31107	9.85551	11.8163	-0.0470953	-5.52592	6.41267	-8.6706	-4.51035	2.65069	8.07974	8.18591	9.34223
948	3.41821	4.87012	3.46897	-4.98978	-4.83214	-0.068826	8.3293	0.129731	6.85587	10.6124	12.5864	-0.0523184	-6.00904	6.97677	-9.38245	-4.92546	2.90038	8.7584	8.84651	10.0288
949	3.72998	5.31667	3.79539	-5.4487	-5.26375	-0.0760952	9.02243	0.142751	7.44372	11.3992	13.3539	-0.0579626	-6.53296	7.58567	-10.1351	-5.37878	3.17454	9.4808	9.54711	10.7436
950	4.07141	5.8037	4.15351	-5.94886	-5.73398	-0.0840261	9.75804	0.156995	8.07563	12.2074	14.102	-0.0641	-7.09958	8.24036	-10.9244	-5.87299	3.47557	10.2444	10.2848	11.4804
951	4.44506	6.33377	4.54607	-6.49281	-6.24525	-0.0927119	10.5329	0.172619	8.75179	13.0256	14.8106	-0.0708055	-7.71031	8.94093	-11.7437	-6.41067	3.80598	11.0448	11.0548	12.2301
952	4.85358	6.90921	4.97591	-7.08282	-6.79975	-0.102252	11.3417	0.189792	9.47124	13.8385	15.4561	-0.0781577	-8.36591	9.68618	-12.5832	-6.99416	4.16849	11.8748	11.8498	12.981
953	5.29968	7.53198	5.44595	-7.7207	-7.39932	-0.112752	12.1763	0.208697	10.2315	14.6269	16.0122	-0.0862404	-9.06617	10.4732	-13.4298	-7.62535	4.56589	12.7244	12.6597	13.7183
954	5.78607	8.20337	5.95906	-8.40755	-8.04523	-0.124329	13.0253	0.229534	11.028	15.3675	16.4509	-0.0951441	-9.80953	11.297	-14.2663	-8.30545	5.00113	13.5797	13.4708	14.4238
955	6.31535	8.92378	6.51798	-9.14345	-8.73792	-0.137108	13.8734	0.252523	11.8539	16.0332	16.7442	-0.104967	-10.5927	12.1497	-15.0711	-9.03474	5.47715	14.4227	14.2659	15.076
956	6.88989	9.6923	7.12519	-9.92705	-9.47664	-0.151228	14.7013	0.277905	12.699	16.594	16.8662	-0.115817	-11.4102	13.02	-15.8182	-9.81209	5.99692	15.231	15.0235	15.6506
957	7.51166	10.5063	7.78268	-10.7551	-10.2591	-0.166842	15.4848	0.305948	13.5496	17.0183	16.7956	-0.127812	-12.2536	13.8928	-16.4778	-10.6346	6.56321	15.9776	15.7185	16.1213
958	8.18201	11.3608	8.49169	-11.6219	-11.0809	-0.184119	16.1958	0.336946	14.388	17.2748	16.5186	-0.141082	-13.1113	14.7484	-17.0171	-11.4968	7.17855	16.6316	16.3223	16.4613
959	8.90138	12.2479	9.25239	-12.5185	-11.935	-0.203245	16.8024	0.371226	15.1918	17.3356	16.0307	-0.155772	-13.9676	15.5624	-17.4019	-12.3905	7.84493	17.1592	16.804	16.6451
960	15.7794	15.74	15.6188	16.8369	16.2168	14.4551	13.4514	15.588	14.4021	14.6139	13.3817	17.9225	15.9287	15.7386	14.6794	15.4732	16.4627	14.7342	15.2637	6.86523
961	12.8834	12.7861	12.4512	13.8755	13.2977	11.6355	10.895	12.753	11.5301	11.9437	10.8994	14.9393	13.059	12.7759	11.867	12.4456	13.4645	11.8886	12.6677	6.20719
962	9.70437	9.53332	9.02113	10.601	10.0948	8.60858	8.09251	9.63951	8.432	9.00644	8.20611	11.6504	9.89486	9.5649	8.81475	9.19486	10.1491	8.79924	9.77642	5.56584
963	6.43311	6.18221	5.53462	7.21425	6.79907	5.54077	5.20813	6.43288	5.28452	5.97583	5.44993	8.25174	6.62785	6.29051	5.69804	5.90379	6.72296	5.64503	6.76385	4.95037
964	3.2283	2.8996	2.15678	3.88403	3.56934	2.56603	2.37991	3.28803	2.23051	2.99819	2.75398	4.90864	3.41879	3.10325	2.66069	2.71815	3.35914	2.57247	3.77978	4.3677
965	0.205706	-0.192781	-0.996747	0.733827	0.521081	-0.220073	-0.288274	0.31868	-0.627688	0.182762	0.210103	1.74125	0.38591	0.110278	-0.192999	-0.260289	0.183812	-0.312414	0.938322	3.82264
966	-2.55995	-3.01613	-3.85431	-2.15739	-2.27192	-2.75688	-2.72558	-2.40118	-3.22446	-2.39728	-2.11979	-1.17517	-2.39389	-2.6213	-2.7955	-2.96916	-2.72201	-2.94114	-1.68292	3.31812
967	-5.02574	-5.52461	-6.37598	-4.74534	-4.76819	-5.01017	-4.88778	-4.82862	-5.5219	-4.69765	-4.198	-3.80089	-4.87613	-5.05458	-5.10757	-5.37503	-5.31214	-5.27391	-4.03659	2.85549
968	-7.16949	-7.69356	-8.54076	-7.00833	-6.94727	-6.9629	-6.74941	-6.94133	-7.49994	-6.69397	-6.004	-6.11941	-7.03769	-7.17184	-7.10858	-7.46229	-7.56264	-7.28969	-6.09672	2.4348
969	-8.98048	-9.50984	-10.3369	-8.93667	-8.80013	-8.60773	-8.29704	-8.72862	-9.14858	-8.37393	-7.52825	-8.12658	-8.86738	-8.96552	-8.78858	-9.22445	-9.46135	-8.97804	-7.85056	2.05508
970	-10.4533	-10.9657	-11.7561	-10.5256	-10.3227	-9.94215	-9.52474	-10.1855	-10.463	-9.73192	-8.76789	-9.82284	-10.3596	-10.4323	-10.1431	-10.6586	-11.001	-10.334	-9.29268	1.71455
971	-11.5848	-12.056	-12.7919	-11.7717	-11.5125	-10.9662	-10.4318	-11.3095	-11.4414	-10.7664	-9.72427	-11.2089	-11.5112	-11.5704	-11.1707	-11.7628	-12.1763	-11.3555	-10.4216	1.41093
972	-12.374	-12.7787	-13.441	-12.6724	-12.3684	-11.6819	-11.0224	-12.1004	-12.0852	-11.4792	-10.4021	-12.284	-12.3211	-12.3792	-11.8728	-12.5365	-12.9836	-12.0437	-11.2387	1.14153
973	-12.8234	-13.1366	-13.7057	-13.2272	-12.8917	-12.0949	-11.3059	-12.5615	-12.4008	-11.8765	-10.8095	-13.0468	-12.7915	-12.8606	-12.2549	-12.9818	-13.4232	-12.4039	-11.7487	0.90347
974	-12.9413	-13.1403	-13.5976	-13.4404	-13.0884	-12.2153	-11.2985	-12.7015	-12.4009	-11.9701	-10.9591	-13.4975	-12.9303	-13.0216	-12.3281	-13.106	-13.5024	-12.4477	-11.9609	0.693791
975	-12.7443	-12.8106	-13.1406	-13.3242	-12.9716	-12.0597	-11.0235	-12.5363	-12.1067	-11.7792	-10.8683	-13.64	-12.7535	-12.8763	-12.1112	-12.9239	-13.2382	-12.1949	-11.8907	0.509526
976	-12.2583	-12.1796	-12.3717	-12.9004	-12.5637	-11.6521	-10.5113	-12.0911	-11.5483	-11.3306	-10.5597	-13.4853	-12.2865	-12.4477	-11.6313	-12.4597	-12.6593	-11.674	-11.5606	0.347794
977	-11.5191	-11.2905	-11.3401	-12.2019	-11.8966	-11.0238	-9.79892	-11.3999	-10.7639	-10.6588	-10.0611	-13.053	-11.5643	-11.7682	-10.9233	-11.7465	-11.8062	-10.9219	-11.0005	0.205841
978	-10.5708	-10.1946	-10.1037	-11.2709	-11.0107	-10.212	-8.92745	-10.5041	-9.79832	-9.80405	-9.40423	-12.3723	-10.6303	-10.878	-10.0289	-10.826	-10.7291	-9.9822	-10.2465	0.081077
979	-9.46237	-8.94802	-8.72465	-10.1572	-9.95274	-9.25791	-7.93998	-9.45056	-8.6993	-8.8103	-8.62331	-11.4809	-9.53341	-9.82333	-8.99317	-9.74515	-9.4843	-8.9023	-9.33901	-0.0289075
980	-8.24493	-7.60724	-7.26413	-8.9136	-8.77233	-8.20405	-6.87874	-8.28758	-7.51478	-7.72208	-7.75314	-10.4229	-8.32436	-8.65279	-7.86234	-8.55308	-8.12966	-7.73001	-8.32057	-0.12633
981	-6.9675	-6.22479	-5.77781	-7.59269	-7.51834	-7.0915	-5.78273	-7.06208	-6.28946	-6.58178	-6.82729	-9.24553	-7.05231	-7.41389	-6.6802	-7.29752	-6.72031	-6.51051	-7.23277	-0.213218
982	-5.67418	-4.84641	-4.31283	-6.24265	-6.23569	-5.9576	-4.68594	-5.81649	-5.06255	-5.42734	-5.87642	-7.99585	-5.76164	-6.1501	-5.48587	-6.02179	-5.30501	-5.28378	-6.11396	-0.291412
983	-4.40209	-3.5092	-2.9063	-4.90486	-4.96307	-4.83431	-3.61629	-4.58687	-3.86627	-4.2907	-4.92714	-6.71732	-4.48986	-4.89864	-4.3122	-4.7627	-3.92395	-4.08301	-4.9975	-0.362576
984	-3.18045	-2.24115	-1.58519	-3.61249	-3.73159	-3.74734	-2.59534	-3.40186	-2.72538	-3.19714	-4.00127	-5.4476	-3.26662	-3.68938	-3.18501	-3.54949	-2.60798	-2.93404	-3.91067	-0.428212
985	-2.03054	-1.06164	-0.367257	-2.39019	-2.5646	-2.71605	-1.63851	-2.28266	-1.65749	-2.16529	-3.11574	-4.21715	-2.11368	-2.54456	-2.12317	-2.40376	-1.37885	-1.85545	-2.8744	-0.489673
986	-0.966447	0.0174618	0.737454	-1.25469	-1.47808	-1.75378	-0.75576	-1.24356	-0.6738	-1.20765	-2.28273	-3.04892	-1.04556	-1.47936	-1.13924	-1.33999	-0.250281	-0.859338	-1.90353	-0.54818
987	0.00386759	0.990395	1.725	-0.215866	-0.481637	-0.868651	0.0475655	-0.292922	0.219821	-0.33152	-1.51019	-1.9587	-0.0705543	-0.502803	-0.240327	-0.366605	0.770635	0.0477017	-1.0075	-0.60484
988	0.877365	1.85612	2.59597	0.721938	0.420329	-0.0644304	0.769828	0.565724	1.02174	0.460118	-0.802413	-0.956027	0.807988	0.381105	0.570819	0.512936	1.68195	0.86346	-0.191172	-0.660658
989	1.65474	2.61704	3.35414	1.55862	1.22747	0.658524	1.41223	1.33256	1.73353	1.16758	-0.160749	-0.0452821	1.59054	1.17225	1.29483	1.29894	2.4855	1.58906	0.544213	-0.716557
990	2.3394	3.27796	4.00542	2.29717	1.94242	1.30242	1.97806	2.0105	2.35903	1.79364	0.415757	0.773167	2.28034	1.87336	1.93479	1.99449	3.18579	2.22805	1.20019	-0.773393
991	2.93657	3.84523	4.55704	2.94267	2.56986	1.8713	2.47201	2.60434	2.90362	2.34279	0.929784	1.50191	2.8825	2.48917	2.49551	2.60457	3.78903	2.7856	1.7803	-0.831967
992	3.45266	4.32613	5.01699	3.50157	3.11584	2.37041	2.89974	3.1201	3.37366	2.82064	1.38522	2.14562	3.40336	3.02568	2.98287	3.13536	4.30248	3.26791	2.28944	-0.893041
993	3.89471	4.7284	5.39355	3.98107	3.58719	2.80574	3.2674	3.56449	3.776	3.23345	1.78673	2.71027	3.84991	3.48964	3.40341	3.59373	4.73395	3.68179	2.73339	-0.957352
994	4.27005	5.05992	5.69508	4.38871	3.99108	3.18363	3.58134	3.94457	4.11767	3.5878	2.13948	3.20264	4.22944	3.88815	3.7639	3.98686	5.09141	4.03422	3.11836	-1.02562
995	4.58598	5.32849	5.92977	4.73207	4.33475	3.51053	3.84793	4.26738	4.40566	3.8903	2.44879	3.62984	4.54926	4.22833	4.07116	4.32193	5.38277	4.3322	3.45076	-1.09857
996	4.84962	5.54163	6.10556	5.01855	4.62532	3.79277	4.07335	4.53986	4.64674	4.14743	2.72001	3.99903	4.81649	4.51717	4.33181	4.60593	5.61571	4.58249	3.73691	-1.17692
997	5.06778	5.70656	6.23004	5.25524	4.86957	4.03642	4.26348	4.76861	4.84733	4.36537	2.95836	4.31719	5.03796	4.76134	4.55219	4.84555	5.79757	4.79158	3.98295	-1.26143
998	5.24687	5.83005	6.31039	5.44885	5.07393	4.24723	4.42388	4.95987	5.01347	4.54999	3.16883	4.59102	5.22007	4.96714	4.73825	5.04707	5.9353	4.96552	4.1947	-1.35287
999	5.39284	5.91844	6.35337	5.60561	5.24438	4.43055	4.55967	5.11945	5.15074	4.7067	3.3561	4.82676	5.3688	5.14042	4.89553	5.21632	6.03537	5.10996	4.37762	-1.45207
