# Supplementary material for: Data assimilation with an improved particle filter and its application in the TRIGRS landslide model
Source: Copernicus journal article supplement (doi:10.5194/nhess-18-2801-2018), 2018-10-26
Supplement: Supplementary file [file nhess-18-2801-2018-supplement-title-page.pdf › nhess-18-2801-2018-supplement-title-page.pdf]

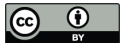

## *Supplement of*

# **Data assimilation with an improved particle filter and its application in the TRIGRS landslide model**

**Changhu Xue et al.**

*Correspondence to:* Guigen Nie ([ggnie@whu.edu.cn](mailto:ggnie@whu.edu.cn))

- [nhess-18-2801-2018-supplement-title-page.pdf](#)
- Data sets
  - Data set of Fig.1 and Fig.2.xlsx
  - Data set of Fig.3.xlsx
  - Data set of Fig.4.txt
  - Data set of Fig.5
    - \* Assimilated-Day00.txt
    - \* Assimilated-Day05.txt
    - \* Assimilated-Day10.txt
    - \* Assimilated-Day15.txt
    - \* Assimilated-Day20.txt
    - \* TRIGRS Model-Day00.txt
    - \* TRIGRS Model-Day05.txt
    - \* TRIGRS Model-Day10.txt
    - \* TRIGRS Model-Day15.txt
    - \* TRIGRS Model-Day20.txt
  - Data set of Fig.6
    - \* -10 days assimiated.txt
    - \* -15 days assimiated.txt
    - \* -20 days assimiated.txt
    - \* -5 days assimiated.txt
  - Data set of Fig.7.txt
  - Data set of Fig.8.txt

The copyright of individual parts of the supplement might differ from the CC BY 4.0 License.
